# Supplementary material
Source: publisher figshare collection journal article supplement (https://acs.figshare.com/ndownloader/files/4016512)
Supplement: Supplementary file 1 [file 4016512]

 
data_1a 
 
_audit_creation_method            SHELXL-97 
_chemical_name_systematic 
; 
 ? 
; 
_chemical_name_common             ? 
_chemical_melting_point           ? 
_chemical_formula_moiety          ? 
_chemical_formula_sum 
 'C6 H19 B11' 
_chemical_formula_weight          210.12 
 
loop_ 
 _atom_type_symbol 
 _atom_type_description 
 _atom_type_scat_dispersion_real 
 _atom_type_scat_dispersion_imag 
 _atom_type_scat_source 
 'C'  'C'   0.0033   0.0016 
 'International Tables Vol C Tables 4.2.6.8 and 6.1.1.4' 
 'H'  'H'   0.0000   0.0000 
 'International Tables Vol C Tables 4.2.6.8 and 6.1.1.4' 
 'B'  'B'   0.0013   0.0007 
 'International Tables Vol C Tables 4.2.6.8 and 6.1.1.4' 
 
_symmetry_cell_setting            Orthorhombic 
_symmetry_space_group_name_H-M    Pbca 
 
loop_ 
 _symmetry_equiv_pos_as_xyz 
 'x, y, z' 
 '-x+1/2, -y, z+1/2' 
 '-x, y+1/2, -z+1/2' 
 'x+1/2, -y+1/2, -z' 
 '-x, -y, -z' 
 'x-1/2, y, -z-1/2' 
 'x, -y-1/2, z-1/2' 
 '-x-1/2, y-1/2, z' 
 
_cell_length_a                    13.051(3) 
_cell_length_b                    12.607(3) 
_cell_length_c                    15.258(3) 
_cell_angle_alpha                 90.00 
_cell_angle_beta                  90.00 
_cell_angle_gamma                 90.00 
_cell_volume                      2510.4(9) 
_cell_formula_units_Z             8 
_cell_measurement_temperature     123(2) 
_cell_measurement_reflns_used     ? 
_cell_measurement_theta_min       ? 
_cell_measurement_theta_max       ? 
 
_exptl_crystal_description        block 
_exptl_crystal_colour             colourless 
_exptl_crystal_size_max           0.50 
_exptl_crystal_size_mid           0.40 
_exptl_crystal_size_min           0.30 
_exptl_crystal_density_meas       ? 
_exptl_crystal_density_diffrn     1.112 
_exptl_crystal_density_method     'not measured' 
_exptl_crystal_F_000              880 
_exptl_absorpt_coefficient_mu     0.049 
_exptl_absorpt_correction_type    Multi-scan 
_exptl_absorpt_correction_T_min   0.4940  
_exptl_absorpt_correction_T_max   0.7456
_exptl_absorpt_process_details    ? 
 
_exptl_special_details 
; 
 ? 
; 
 
_diffrn_ambient_temperature       123(2) 
_diffrn_radiation_wavelength      0.71073 
_diffrn_radiation_type            MoK\a 
_diffrn_radiation_source          'fine-focus sealed tube' 
_diffrn_radiation_monochromator   graphite 
_diffrn_measurement_device_type   'BRUKER KAPPA APEXII DUO DIFFRACTOMETER' 
_diffrn_measurement_method        'OMEGA SCAN' 
_diffrn_detector_area_resol_mean  ? 
_diffrn_reflns_number             18228 
_diffrn_reflns_av_R_equivalents   0.0624 
_diffrn_reflns_av_sigmaI/netI     0.0352 
_diffrn_reflns_limit_h_min        -15 
_diffrn_reflns_limit_h_max        14 
_diffrn_reflns_limit_k_min        -14 
_diffrn_reflns_limit_k_max        13 
_diffrn_reflns_limit_l_min        -18 
_diffrn_reflns_limit_l_max        18 
_diffrn_reflns_theta_min          2.61 
_diffrn_reflns_theta_max          25.00 
_reflns_number_total              2197 
_reflns_number_gt                 1579 
_reflns_threshold_expression      >2sigma(I) 
 
_computing_data_collection        'BRUKER KAPPA APEXII DUO DIFFRACTOMETER'  
_computing_cell_refinement        'BRUKER KAPPA APEXII DUO DIFFRACTOMETER'  
_computing_data_reduction         'BRUKER KAPPA APEXII DUO DIFFRACTOMETER'  
_computing_structure_solution     'SHELXS-97 (Sheldrick, 2008)' 
_computing_structure_refinement   'SHELXL-97 (Sheldrick, 2008)' 
_computing_molecular_graphics     'SIEMENS SHELXTL' 
_computing_publication_material   'SIEMENS SHELXTL' 
 
_refine_special_details 
; 
 Refinement of F^2^ against ALL reflections.  The weighted R-factor wR and 
 goodness of fit S are based on F^2^, conventional R-factors R are based 
 on F, with F set to zero for negative F^2^. The threshold expression of 
 F^2^ > 2sigma(F^2^) is used only for calculating R-factors(gt) etc. and is 
 not relevant to the choice of reflections for refinement.  R-factors based 
 on F^2^ are statistically about twice as large as those based on F, and R- 
 factors based on ALL data will be even larger. 
; 
 
_refine_ls_structure_factor_coef  Fsqd  
_refine_ls_matrix_type            full 
_refine_ls_weighting_scheme       calc  
_refine_ls_weighting_details 
 'calc w=1/[\s^2^(Fo^2^)+(0.0789P)^2^+2.6070P] where P=(Fo^2^+2Fc^2^)/3' 
_atom_sites_solution_primary      direct 
_atom_sites_solution_secondary    difmap 
_atom_sites_solution_hydrogens    geom 
_refine_ls_hydrogen_treatment     riding
_refine_ls_extinction_method      none 
_refine_ls_extinction_coef        ? 
_refine_ls_number_reflns          2197 
_refine_ls_number_parameters      154 
_refine_ls_number_restraints      0 
_refine_ls_R_factor_all           0.0930 
_refine_ls_R_factor_gt            0.0646 
_refine_ls_wR_factor_ref          0.1972 
_refine_ls_wR_factor_gt           0.1708 
_refine_ls_goodness_of_fit_ref    1.148 
_refine_ls_restrained_S_all       1.148 
_refine_ls_shift/su_max           0.001 
_refine_ls_shift/su_mean          0.000 
 
loop_ 
 _atom_site_label 
 _atom_site_type_symbol 
 _atom_site_fract_x 
 _atom_site_fract_y 
 _atom_site_fract_z 
 _atom_site_U_iso_or_equiv 
 _atom_site_adp_type 
 _atom_site_occupancy 
 _atom_site_symmetry_multiplicity 
 _atom_site_calc_flag 
 _atom_site_refinement_flags 
 _atom_site_disorder_assembly 
 _atom_site_disorder_group 
C1 C 0.2363(2) 0.93642(19) 0.40764(16) 0.0259(6) Uani 1 1 d . . . 
C2 C 0.3199(2) 0.8809(2) 0.44650(17) 0.0284(6) Uani 1 1 d . . . 
C11 C 0.1484(2) 0.9622(2) 0.46866(18) 0.0330(7) Uani 1 1 d . . . 
H11A H 0.0901 0.9898 0.4340 0.040 Uiso 1 1 calc R . . 
H11B H 0.1701 1.0185 0.5099 0.040 Uiso 1 1 calc R . . 
C12 C 0.1134(2) 0.8653(3) 0.52079(19) 0.0386(7) Uani 1 1 d . . . 
H12A H 0.0726 0.8893 0.5718 0.046 Uiso 1 1 calc R . . 
H12B H 0.0682 0.8213 0.4833 0.046 Uiso 1 1 calc R . . 
C13 C 0.2023(2) 0.7971(2) 0.55336(18) 0.0372(7) Uani 1 1 d . . . 
H13A H 0.1919 0.7807 0.6162 0.045 Uiso 1 1 calc R . . 
H13B H 0.2029 0.7292 0.5208 0.045 Uiso 1 1 calc R . . 
C14 C 0.3053(2) 0.8519(2) 0.54182(17) 0.0354(7) Uani 1 1 d . . . 
H14A H 0.3078 0.9167 0.5784 0.042 Uiso 1 1 calc R . . 
H14B H 0.3611 0.8040 0.5610 0.042 Uiso 1 1 calc R . . 
B3 B 0.3537(2) 1.0124(2) 0.3874(2) 0.0312(7) Uani 1 1 d . . . 
H3 H 0.3424 1.0841 0.4297 0.037 Uiso 1 1 calc R . . 
B4 B 0.4394(2) 0.8912(3) 0.4130(2) 0.0311(7) Uani 1 1 d . . . 
H4 H 0.4971 0.8879 0.4673 0.037 Uiso 1 1 calc R . . 
B5 B 0.3631(2) 0.7818(2) 0.37557(18) 0.0273(7) Uani 1 1 d . . . 
H5 H 0.3614 0.7006 0.4054 0.033 Uiso 1 1 calc R . . 
B6 B 0.2385(2) 0.8359(2) 0.32103(19) 0.0276(7) Uani 1 1 d . . . 
H6 H 0.1723 0.7800 0.3276 0.033 Uiso 1 1 calc R . . 
B7 B 0.2330(3) 0.9834(2) 0.31296(18) 0.0289(7) Uani 1 1 d . . . 
H7 H 0.1633 1.0333 0.3018 0.035 Uiso 1 1 calc R . . 
B8 B 0.4619(3) 0.9734(3) 0.3209(2) 0.0352(8) Uani 1 1 d . . . 
H8 H 0.5319 1.0247 0.3217 0.042 Uiso 1 1 calc R . . 
B9 B 0.4668(3) 0.8317(3) 0.3132(2) 0.0332(8) Uani 1 1 d . . . 
H9 H 0.5397 0.7859 0.3052 0.040 Uiso 1 1 calc R . . 
B10 B 0.3481(2) 0.7946(2) 0.26227(18) 0.0287(7) Uani 1 1 d . . . 
H10 H 0.3410 0.7194 0.2237 0.034 Uiso 1 1 calc R . . 
B11 B 0.2835(3) 0.9102(2) 0.22525(19) 0.0307(7) Uani 1 1 d . . . 
H11 H 0.2401 0.9117 0.1619 0.037 Uiso 1 1 calc R . . 
B12 B 0.3536(3) 1.0195(2) 0.2651(2) 0.0331(8) Uani 1 1 d . . . 
H12 H 0.3571 1.0976 0.2304 0.040 Uiso 1 1 calc R . . 
B13 B 0.4185(3) 0.9078(3) 0.2244(2) 0.0346(8) Uani 1 1 d . . . 
H13 H 0.4616 0.9095 0.1609 0.042 Uiso 1 1 calc R . . 
 
loop_ 
 _atom_site_aniso_label 
 _atom_site_aniso_U_11 
 _atom_site_aniso_U_22 
 _atom_site_aniso_U_33 
 _atom_site_aniso_U_23 
 _atom_site_aniso_U_13 
 _atom_site_aniso_U_12 
C1 0.0299(14) 0.0182(12) 0.0296(13) -0.0011(10) -0.0034(11) -0.0019(11) 
C2 0.0296(14) 0.0278(14) 0.0277(13) -0.0037(11) -0.0022(11) 0.0035(11) 
C11 0.0303(15) 0.0317(16) 0.0372(15) 0.0010(12) -0.0003(12) 0.0070(12) 
C12 0.0333(16) 0.0440(18) 0.0384(15) 0.0067(14) 0.0024(12) 0.0024(13) 
C13 0.0457(18) 0.0357(17) 0.0303(14) 0.0044(12) 0.0038(12) 0.0043(13) 
C14 0.0393(17) 0.0413(17) 0.0256(13) 0.0009(12) -0.0023(12) 0.0104(13) 
B3 0.0320(18) 0.0229(16) 0.0388(16) -0.0047(13) -0.0019(13) -0.0046(13) 
B4 0.0268(17) 0.0332(18) 0.0333(16) -0.0056(13) -0.0049(13) 0.0023(13) 
B5 0.0329(17) 0.0227(16) 0.0263(14) -0.0012(12) -0.0026(12) 0.0064(13) 
B6 0.0323(17) 0.0189(15) 0.0317(15) -0.0007(12) -0.0065(13) -0.0021(12) 
B7 0.0344(18) 0.0208(15) 0.0314(16) 0.0007(12) -0.0056(13) -0.0012(13) 
B8 0.0322(18) 0.0330(19) 0.0405(17) -0.0041(14) 0.0027(14) -0.0066(14) 
B9 0.0300(17) 0.0352(19) 0.0342(16) -0.0028(13) 0.0009(13) 0.0028(14) 
B10 0.0398(19) 0.0225(16) 0.0237(14) -0.0025(12) -0.0019(13) 0.0012(13) 
B11 0.045(2) 0.0215(15) 0.0262(15) -0.0010(12) -0.0051(13) -0.0004(13) 
B12 0.042(2) 0.0240(16) 0.0331(16) 0.0022(13) 0.0023(14) -0.0059(14) 
B13 0.0427(19) 0.0303(18) 0.0308(16) 0.0003(13) 0.0058(14) -0.0027(14) 
 
_geom_special_details 
; 
 All esds (except the esd in the dihedral angle between two l.s. planes) 
 are estimated using the full covariance matrix.  The cell esds are taken 
 into account individually in the estimation of esds in distances, angles 
 and torsion angles; correlations between esds in cell parameters are only 
 used when they are defined by crystal symmetry.  An approximate (isotropic) 
 treatment of cell esds is used for estimating esds involving l.s. planes. 
; 
 
loop_ 
 _geom_bond_atom_site_label_1 
 _geom_bond_atom_site_label_2 
 _geom_bond_distance 
 _geom_bond_site_symmetry_2 
 _geom_bond_publ_flag 
C1 C2 1.425(4) . ? 
C1 C11 1.512(4) . ? 
C1 B7 1.562(4) . ? 
C1 B6 1.831(4) . ? 
C2 C14 1.512(4) . ? 
C2 B4 1.647(4) . ? 
C2 B5 1.747(4) . ? 
C2 B3 1.938(4) . ? 
C11 C12 1.528(4) . ? 
C12 C13 1.528(4) . ? 
C13 C14 1.521(4) . ? 
B3 B8 1.807(5) . ? 
B3 B12 1.868(4) . ? 
B3 B4 1.934(5) . ? 
B3 B7 1.976(4) . ? 
B4 B9 1.734(4) . ? 
B4 B8 1.769(5) . ? 
B4 B5 1.795(4) . ? 
B5 B10 1.747(4) . ? 
B5 B9 1.770(4) . ? 
B5 B6 1.950(4) . ? 
B6 B10 1.766(4) . ? 
B6 B11 1.833(4) . ? 
B6 B7 1.865(4) . ? 
B7 B11 1.754(4) . ? 
B7 B12 1.793(4) . ? 
B8 B12 1.750(5) . ? 
B8 B13 1.782(5) . ? 
B8 B9 1.791(5) . ? 
B9 B13 1.776(5) . ? 
B9 B10 1.796(4) . ? 
B10 B11 1.776(4) . ? 
B10 B13 1.793(4) . ? 
B11 B12 1.762(4) . ? 
B11 B13 1.762(5) . ? 
B12 B13 1.757(5) . ? 
 
loop_ 
 _geom_angle_atom_site_label_1 
 _geom_angle_atom_site_label_2 
 _geom_angle_atom_site_label_3 
 _geom_angle 
 _geom_angle_site_symmetry_1 
 _geom_angle_site_symmetry_3 
 _geom_angle_publ_flag 
C2 C1 C11 115.5(2) . . ? 
C2 C1 B7 126.3(2) . . ? 
C11 C1 B7 117.9(2) . . ? 
C2 C1 B6 87.03(19) . . ? 
C11 C1 B6 127.2(2) . . ? 
B7 C1 B6 66.14(17) . . ? 
C1 C2 C14 115.0(2) . . ? 
C1 C2 B4 123.9(2) . . ? 
C14 C2 B4 115.9(2) . . ? 
C1 C2 B5 109.9(2) . . ? 
C14 C2 B5 117.6(2) . . ? 
B4 C2 B5 63.77(17) . . ? 
C1 C2 B3 63.94(17) . . ? 
C14 C2 B3 133.1(2) . . ? 
B4 C2 B3 64.69(18) . . ? 
B5 C2 B3 104.49(19) . . ? 
C1 C11 C12 112.1(2) . . ? 
C13 C12 C11 113.0(2) . . ? 
C14 C13 C12 112.2(2) . . ? 
C2 C14 C13 109.4(2) . . ? 
B8 B3 B12 56.85(17) . . ? 
B8 B3 B4 56.34(17) . . ? 
B12 B3 B4 103.9(2) . . ? 
B8 B3 C2 101.9(2) . . ? 
B12 B3 C2 120.4(2) . . ? 
B4 B3 C2 50.34(15) . . ? 
B8 B3 B7 104.5(2) . . ? 
B12 B3 B7 55.52(16) . . ? 
B4 B3 B7 115.5(2) . . ? 
C2 B3 B7 85.85(17) . . ? 
C2 B4 B9 115.7(2) . . ? 
C2 B4 B8 116.7(2) . . ? 
B9 B4 B8 61.46(19) . . ? 
C2 B4 B5 60.83(17) . . ? 
B9 B4 B5 60.19(18) . . ? 
B8 B4 B5 106.8(2) . . ? 
C2 B4 B3 64.98(17) . . ? 
B9 B4 B3 106.5(2) . . ? 
B8 B4 B3 58.21(17) . . ? 
B5 B4 B3 102.8(2) . . ? 
C2 B5 B10 120.7(2) . . ? 
C2 B5 B9 109.0(2) . . ? 
B10 B5 B9 61.39(18) . . ? 
C2 B5 B4 55.40(16) . . ? 
B10 B5 B4 107.8(2) . . ? 
B9 B5 B4 58.22(17) . . ? 
C2 B5 B6 75.22(16) . . ? 
B10 B5 B6 56.75(16) . . ? 
B9 B5 B6 106.5(2) . . ? 
B4 B5 B6 109.2(2) . . ? 
B10 B6 C1 125.7(2) . . ? 
B10 B6 B11 59.11(17) . . ? 
C1 B6 B11 103.08(19) . . ? 
B10 B6 B7 106.9(2) . . ? 
C1 B6 B7 49.97(14) . . ? 
B11 B6 B7 56.60(16) . . ? 
B10 B6 B5 55.83(16) . . ? 
C1 B6 B5 86.98(17) . . ? 
B11 B6 B5 104.6(2) . . ? 
B7 B6 B5 114.1(2) . . ? 
C1 B7 B11 119.8(2) . . ? 
C1 B7 B12 116.7(2) . . ? 
B11 B7 B12 59.56(18) . . ? 
C1 B7 B6 63.89(16) . . ? 
B11 B7 B6 60.76(16) . . ? 
B12 B7 B6 104.3(2) . . ? 
C1 B7 B3 61.11(16) . . ? 
B11 B7 B3 103.7(2) . . ? 
B12 B7 B3 59.19(17) . . ? 
B6 B7 B3 96.67(19) . . ? 
B12 B8 B4 116.5(2) . . ? 
B12 B8 B13 59.66(19) . . ? 
B4 B8 B13 109.4(2) . . ? 
B12 B8 B9 109.2(2) . . ? 
B4 B8 B9 58.30(17) . . ? 
B13 B8 B9 59.61(18) . . ? 
B12 B8 B3 63.33(19) . . ? 
B4 B8 B3 65.45(18) . . ? 
B13 B8 B3 110.0(2) . . ? 
B9 B8 B3 109.7(2) . . ? 
B4 B9 B5 61.59(18) . . ? 
B4 B9 B13 111.3(2) . . ? 
B5 B9 B13 109.3(2) . . ? 
B4 B9 B8 60.24(18) . . ? 
B5 B9 B8 107.0(2) . . ? 
B13 B9 B8 59.96(18) . . ? 
B4 B9 B10 108.3(2) . . ? 
B5 B9 B10 58.67(17) . . ? 
B13 B9 B10 60.25(18) . . ? 
B8 B9 B10 104.9(2) . . ? 
B5 B10 B6 67.41(17) . . ? 
B5 B10 B11 116.4(2) . . ? 
B6 B10 B11 62.32(17) . . ? 
B5 B10 B13 109.6(2) . . ? 
B6 B10 B13 110.1(2) . . ? 
B11 B10 B13 59.18(18) . . ? 
B5 B10 B9 59.93(17) . . ? 
B6 B10 B9 113.7(2) . . ? 
B11 B10 B9 109.5(2) . . ? 
B13 B10 B9 59.33(18) . . ? 
B7 B11 B12 61.33(18) . . ? 
B7 B11 B13 113.0(2) . . ? 
B12 B11 B13 59.83(18) . . ? 
B7 B11 B10 111.5(2) . . ? 
B12 B11 B10 106.6(2) . . ? 
B13 B11 B10 60.88(18) . . ? 
B7 B11 B6 62.63(16) . . ? 
B12 B11 B6 106.9(2) . . ? 
B13 B11 B6 108.5(2) . . ? 
B10 B11 B6 58.57(16) . . ? 
B8 B12 B13 61.08(19) . . ? 
B8 B12 B11 109.1(2) . . ? 
B13 B12 B11 60.10(19) . . ? 
B8 B12 B7 115.2(2) . . ? 
B13 B12 B7 111.3(2) . . ? 
B11 B12 B7 59.11(17) . . ? 
B8 B12 B3 59.82(17) . . ? 
B13 B12 B3 108.3(2) . . ? 
B11 B12 B3 107.9(2) . . ? 
B7 B12 B3 65.29(17) . . ? 
B12 B13 B11 60.07(18) . . ? 
B12 B13 B9 109.5(2) . . ? 
B11 B13 B9 111.0(2) . . ? 
B12 B13 B8 59.26(18) . . ? 
B11 B13 B8 107.7(2) . . ? 
B9 B13 B8 60.43(18) . . ? 
B12 B13 B10 106.1(2) . . ? 
B11 B13 B10 59.95(18) . . ? 
B9 B13 B10 60.42(18) . . ? 
B8 B13 B10 105.4(2) . . ? 
 
_diffrn_measured_fraction_theta_max    0.997 
_diffrn_reflns_theta_full              25.00 
_diffrn_measured_fraction_theta_full   0.997 
_refine_diff_density_max    0.279 
_refine_diff_density_min   -0.212 
_refine_diff_density_rms    0.052 

#===END


data_1b 
 
_audit_creation_method            SHELXL-97 
_chemical_name_systematic 
; 
 ? 
; 
_chemical_name_common             ? 
_chemical_melting_point           ? 
_chemical_formula_moiety          ? 
_chemical_formula_sum 
 'C5 H17 B11' 
_chemical_formula_weight          196.10 
 
loop_ 
 _atom_type_symbol 
 _atom_type_description 
 _atom_type_scat_dispersion_real 
 _atom_type_scat_dispersion_imag 
 _atom_type_scat_source 
 'C'  'C'   0.0033   0.0016 
 'International Tables Vol C Tables 4.2.6.8 and 6.1.1.4' 
 'H'  'H'   0.0000   0.0000 
 'International Tables Vol C Tables 4.2.6.8 and 6.1.1.4' 
 'B'  'B'   0.0013   0.0007 
 'International Tables Vol C Tables 4.2.6.8 and 6.1.1.4' 
 
_symmetry_cell_setting            Monoclinic 
_symmetry_space_group_name_H-M    P2(1)/c 
 
loop_ 
 _symmetry_equiv_pos_as_xyz 
 'x, y, z' 
 '-x, y+1/2, -z+1/2' 
 '-x, -y, -z' 
 'x, -y-1/2, z-1/2' 
 
_cell_length_a                    7.381(6) 
_cell_length_b                    13.807(12) 
_cell_length_c                    12.919(11) 
_cell_angle_alpha                 90.00 
_cell_angle_beta                  105.673(17) 
_cell_angle_gamma                 90.00 
_cell_volume                      1267.5(18) 
_cell_formula_units_Z             4 
_cell_measurement_temperature     296(2) 
_cell_measurement_reflns_used     ? 
_cell_measurement_theta_min       ? 
_cell_measurement_theta_max       ? 
 
_exptl_crystal_description        block 
_exptl_crystal_colour             colourless 
_exptl_crystal_size_max           0.50 
_exptl_crystal_size_mid           0.40 
_exptl_crystal_size_min           0.30 
_exptl_crystal_density_meas       ? 
_exptl_crystal_density_diffrn     1.028 
_exptl_crystal_density_method     'not measured' 
_exptl_crystal_F_000              408 
_exptl_absorpt_coefficient_mu     0.044 
_exptl_absorpt_correction_type    Multi-scan 
_exptl_absorpt_correction_T_min   0.771706
_exptl_absorpt_correction_T_max   1.0000
_exptl_absorpt_process_details    ? 
 
_exptl_special_details 
; 
 ? 
; 
 
_diffrn_ambient_temperature       296(2) 
_diffrn_radiation_wavelength      0.71073 
_diffrn_radiation_type            MoK\a 
_diffrn_radiation_source          'fine-focus sealed tube' 
_diffrn_radiation_monochromator   graphite 
_diffrn_measurement_device_type   'BRUKER APEXII CCD DIFFRACTOMETER' 
_diffrn_measurement_method        'OMEGA SCAN' 
_diffrn_detector_area_resol_mean  ? 
_diffrn_standards_number          ? 
_diffrn_standards_interval_count  ? 
_diffrn_standards_interval_time   ? 
_diffrn_standards_decay_%         ? 
_diffrn_reflns_number             13759 
_diffrn_reflns_av_R_equivalents   0.0281 
_diffrn_reflns_av_sigmaI/netI     0.0247 
_diffrn_reflns_limit_h_min        -9 
_diffrn_reflns_limit_h_max        9 
_diffrn_reflns_limit_k_min        -18 
_diffrn_reflns_limit_k_max        14 
_diffrn_reflns_limit_l_min        -16 
_diffrn_reflns_limit_l_max        14 
_diffrn_reflns_theta_min          2.20 
_diffrn_reflns_theta_max          27.66 
_reflns_number_total              2944 
_reflns_number_gt                 1930 
_reflns_threshold_expression      >2sigma(I) 
 
_computing_data_collection        'BRUKER APEXII CCD DIFFRACTOMETER'  
_computing_cell_refinement        'BRUKER APEXII CCD DIFFRACTOMETER'  
_computing_data_reduction         'BRUKER APEXII CCD DIFFRACTOMETER'  
_computing_structure_solution     'SHELXS-97 (Sheldrick, 1990)' 
_computing_structure_refinement   'SHELXL-97 (Sheldrick, 1997)' 
_computing_molecular_graphics     'SIEMENS SHELXTL' 
_computing_publication_material   'SIEMENS SHELXTL' 
 
_refine_special_details 
; 
 Refinement of F^2^ against ALL reflections.  The weighted R-factor wR and 
 goodness of fit S are based on F^2^, conventional R-factors R are based 
 on F, with F set to zero for negative F^2^. The threshold expression of 
 F^2^ > 2sigma(F^2^) is used only for calculating R-factors(gt) etc. and is 
 not relevant to the choice of reflections for refinement.  R-factors based 
 on F^2^ are statistically about twice as large as those based on F, and R- 
 factors based on ALL data will be even larger. 
; 
 
_refine_ls_structure_factor_coef  Fsqd  
_refine_ls_matrix_type            full 
_refine_ls_weighting_scheme       calc  
_refine_ls_weighting_details 
 'calc w=1/[\s^2^(Fo^2^)+(0.1806P)^2^+0.2975P] where P=(Fo^2^+2Fc^2^)/3' 
_atom_sites_solution_primary      direct 
_atom_sites_solution_secondary    difmap 
_atom_sites_solution_hydrogens    geom 
_refine_ls_hydrogen_treatment     riding
_refine_ls_extinction_method      none 
_refine_ls_extinction_coef        ? 
_refine_ls_number_reflns          2944 
_refine_ls_number_parameters      145 
_refine_ls_number_restraints      0 
_refine_ls_R_factor_all           0.1145 
_refine_ls_R_factor_gt            0.0807 
_refine_ls_wR_factor_ref          0.2901 
_refine_ls_wR_factor_gt           0.2485 
_refine_ls_goodness_of_fit_ref    1.002 
_refine_ls_restrained_S_all       1.002 
_refine_ls_shift/su_max           0.000 
_refine_ls_shift/su_mean          0.000 
 
loop_ 
 _atom_site_label 
 _atom_site_type_symbol 
 _atom_site_fract_x 
 _atom_site_fract_y 
 _atom_site_fract_z 
 _atom_site_U_iso_or_equiv 
 _atom_site_adp_type 
 _atom_site_occupancy 
 _atom_site_symmetry_multiplicity 
 _atom_site_calc_flag 
 _atom_site_refinement_flags 
 _atom_site_disorder_assembly 
 _atom_site_disorder_group 
C1 C 0.3322(3) 0.16181(15) 0.38730(16) 0.0545(6) Uani 1 1 d . . . 
C2 C 0.3133(3) 0.21378(15) 0.28999(16) 0.0544(6) Uani 1 1 d . . . 
C11 C 0.4926(4) 0.2069(2) 0.4757(2) 0.0873(9) Uani 1 1 d . . . 
H11A H 0.4530 0.2181 0.5405 0.105 Uiso 1 1 calc R . . 
H11B H 0.6020 0.1649 0.4930 0.105 Uiso 1 1 calc R . . 
C12 C 0.5355(6) 0.3003(3) 0.4292(3) 0.1189(15) Uani 1 1 d . . . 
H12A H 0.4775 0.3536 0.4573 0.143 Uiso 1 1 calc R . . 
H12B H 0.6704 0.3109 0.4485 0.143 Uiso 1 1 calc R . . 
C13 C 0.4603(5) 0.2954(2) 0.3099(2) 0.0909(10) Uani 1 1 d . . . 
H13A H 0.5599 0.2804 0.2764 0.109 Uiso 1 1 calc R . . 
H13B H 0.4026 0.3564 0.2814 0.109 Uiso 1 1 calc R . . 
B3 B 0.0896(4) 0.20831(18) 0.3331(2) 0.0590(6) Uani 1 1 d . . . 
H3 H 0.0734 0.2811 0.3639 0.071 Uiso 1 1 calc R . . 
B4 B 0.1357(4) 0.21501(18) 0.1873(2) 0.0577(6) Uani 1 1 d . . . 
H4 H 0.1293 0.2793 0.1361 0.069 Uiso 1 1 calc R . . 
B5 B 0.3017(4) 0.1128(2) 0.1994(2) 0.0626(7) Uani 1 1 d . . . 
H5 H 0.4227 0.1089 0.1651 0.075 Uiso 1 1 calc R . . 
B6 B 0.3300(4) 0.04089(19) 0.3335(2) 0.0656(7) Uani 1 1 d . . . 
H6 H 0.4654 0.0031 0.3628 0.079 Uiso 1 1 calc R . . 
B7 B 0.1843(4) 0.09010(19) 0.4172(2) 0.0643(7) Uani 1 1 d . . . 
H7 H 0.2083 0.0787 0.5041 0.077 Uiso 1 1 calc R . . 
B8 B -0.0753(4) 0.1614(2) 0.2086(2) 0.0673(7) Uani 1 1 d . . . 
H8 H -0.2087 0.1999 0.1746 0.081 Uiso 1 1 calc R . . 
B9 B 0.0541(4) 0.1038(2) 0.1276(2) 0.0711(8) Uani 1 1 d . . . 
H9 H 0.0057 0.1008 0.0394 0.085 Uiso 1 1 calc R . . 
B10 B 0.1774(4) 0.0064(2) 0.2095(3) 0.0809(10) Uani 1 1 d . . . 
H10 H 0.2178 -0.0586 0.1719 0.097 Uiso 1 1 calc R . . 
B11 B 0.0959(5) -0.0043(2) 0.3286(3) 0.0836(10) Uani 1 1 d . . . 
H11 H 0.0732 -0.0744 0.3636 0.100 Uiso 1 1 calc R . . 
B12 B -0.0499(4) 0.0963(2) 0.3283(3) 0.0786(9) Uani 1 1 d . . . 
H12 H -0.1675 0.0953 0.3655 0.094 Uiso 1 1 calc R . . 
B13 B -0.0604(4) 0.0339(2) 0.2057(3) 0.0873(10) Uani 1 1 d . . . 
H13 H -0.1797 -0.0123 0.1647 0.105 Uiso 1 1 calc R . . 
 
loop_ 
 _atom_site_aniso_label 
 _atom_site_aniso_U_11 
 _atom_site_aniso_U_22 
 _atom_site_aniso_U_33 
 _atom_site_aniso_U_23 
 _atom_site_aniso_U_13 
 _atom_site_aniso_U_12 
C1 0.0511(11) 0.0557(11) 0.0512(12) 0.0037(9) 0.0043(9) -0.0043(8) 
C2 0.0548(12) 0.0613(12) 0.0474(11) -0.0025(8) 0.0142(9) -0.0116(9) 
C11 0.0859(19) 0.097(2) 0.0599(16) 0.0003(13) -0.0127(14) -0.0214(15) 
C12 0.140(3) 0.120(3) 0.077(2) -0.0067(18) -0.005(2) -0.078(2) 
C13 0.099(2) 0.094(2) 0.0774(19) 0.0008(14) 0.0202(16) -0.0480(16) 
B3 0.0611(14) 0.0604(13) 0.0575(14) -0.0020(10) 0.0193(12) 0.0140(11) 
B4 0.0600(14) 0.0559(12) 0.0520(13) 0.0092(10) 0.0065(11) 0.0094(10) 
B5 0.0553(14) 0.0759(16) 0.0578(15) -0.0113(12) 0.0174(11) 0.0130(12) 
B6 0.0597(15) 0.0543(13) 0.0745(17) 0.0017(12) 0.0039(12) 0.0159(11) 
B7 0.0655(16) 0.0687(15) 0.0603(15) 0.0162(12) 0.0198(12) -0.0054(12) 
B8 0.0425(12) 0.0803(18) 0.0718(17) 0.0020(13) 0.0027(11) 0.0126(11) 
B9 0.0676(17) 0.0783(18) 0.0542(15) -0.0155(12) -0.0061(12) 0.0085(13) 
B10 0.082(2) 0.0545(14) 0.093(2) -0.0243(14) 0.0012(16) 0.0151(13) 
B11 0.083(2) 0.0541(14) 0.106(2) 0.0136(15) 0.0134(18) -0.0167(13) 
B12 0.0504(15) 0.094(2) 0.094(2) 0.0123(17) 0.0239(15) -0.0097(13) 
B13 0.0627(18) 0.0736(18) 0.111(3) -0.0126(17) -0.0018(16) -0.0214(14) 
 
_geom_special_details 
; 
 All esds (except the esd in the dihedral angle between two l.s. planes) 
 are estimated using the full covariance matrix.  The cell esds are taken 
 into account individually in the estimation of esds in distances, angles 
 and torsion angles; correlations between esds in cell parameters are only 
 used when they are defined by crystal symmetry.  An approximate (isotropic) 
 treatment of cell esds is used for estimating esds involving l.s. planes. 
; 
 
loop_ 
 _geom_bond_atom_site_label_1 
 _geom_bond_atom_site_label_2 
 _geom_bond_distance 
 _geom_bond_site_symmetry_2 
 _geom_bond_publ_flag 
C1 C2 1.421(3) . ? 
C1 C11 1.537(3) . ? 
C1 B7 1.597(3) . ? 
C1 B6 1.807(4) . ? 
C1 B3 1.852(3) . ? 
C2 C13 1.537(3) . ? 
C2 B4 1.594(3) . ? 
C2 B5 1.807(3) . ? 
C11 C12 1.493(4) . ? 
C12 C13 1.492(4) . ? 
B3 B12 1.850(4) . ? 
B3 B8 1.852(4) . ? 
B3 B7 1.980(4) . ? 
B3 B4 2.005(4) . ? 
B4 B9 1.750(4) . ? 
B4 B8 1.811(4) . ? 
B4 B5 1.847(4) . ? 
B5 B10 1.756(4) . ? 
B5 B9 1.817(4) . ? 
B5 B6 1.959(4) . ? 
B6 B10 1.756(4) . ? 
B6 B11 1.822(4) . ? 
B6 B7 1.849(4) . ? 
B7 B11 1.741(4) . ? 
B7 B12 1.800(4) . ? 
B8 B12 1.756(5) . ? 
B8 B13 1.766(5) . ? 
B8 B9 1.783(4) . ? 
B9 B13 1.768(5) . ? 
B9 B10 1.798(4) . ? 
B10 B13 1.783(5) . ? 
B10 B11 1.802(6) . ? 
B11 B12 1.756(5) . ? 
B11 B13 1.772(5) . ? 
B12 B13 1.786(5) . ? 
 
loop_ 
 _geom_angle_atom_site_label_1 
 _geom_angle_atom_site_label_2 
 _geom_angle_atom_site_label_3 
 _geom_angle 
 _geom_angle_site_symmetry_1 
 _geom_angle_site_symmetry_3 
 _geom_angle_publ_flag 
C2 C1 C11 109.0(2) . . ? 
C2 C1 B7 128.08(19) . . ? 
C11 C1 B7 120.7(2) . . ? 
C2 C1 B6 97.91(18) . . ? 
C11 C1 B6 125.8(2) . . ? 
B7 C1 B6 65.45(17) . . ? 
C2 C1 B3 68.70(15) . . ? 
C11 C1 B3 127.8(2) . . ? 
B7 C1 B3 69.63(16) . . ? 
B6 C1 B3 105.50(16) . . ? 
C1 C2 C13 109.04(19) . . ? 
C1 C2 B4 127.15(19) . . ? 
C13 C2 B4 121.1(2) . . ? 
C1 C2 B5 99.19(18) . . ? 
C13 C2 B5 125.5(2) . . ? 
B4 C2 B5 65.45(15) . . ? 
C12 C11 C1 104.8(2) . . ? 
C13 C12 C11 108.5(2) . . ? 
C12 C13 C2 104.7(2) . . ? 
B12 B3 B8 56.61(17) . . ? 
B12 B3 C1 101.26(17) . . ? 
B8 B3 C1 123.28(17) . . ? 
B12 B3 B7 55.93(15) . . ? 
B8 B3 B7 103.90(18) . . ? 
C1 B3 B7 49.11(11) . . ? 
B12 B3 B4 103.98(18) . . ? 
B8 B3 B4 55.84(15) . . ? 
C1 B3 B4 88.81(15) . . ? 
B7 B3 B4 115.43(16) . . ? 
C2 B4 B9 117.72(18) . . ? 
C2 B4 B8 114.65(19) . . ? 
B9 B4 B8 60.04(17) . . ? 
C2 B4 B5 62.86(14) . . ? 
B9 B4 B5 60.59(16) . . ? 
B8 B4 B5 104.68(18) . . ? 
C2 B4 B3 61.79(15) . . ? 
B9 B4 B3 104.33(18) . . ? 
B8 B4 B3 57.82(14) . . ? 
B5 B4 B3 99.34(16) . . ? 
B10 B5 C2 122.1(2) . . ? 
B10 B5 B9 60.42(17) . . ? 
C2 B5 B9 104.38(17) . . ? 
B10 B5 B4 107.3(2) . . ? 
C2 B5 B4 51.69(13) . . ? 
B9 B5 B4 57.06(15) . . ? 
B10 B5 B6 56.12(16) . . ? 
C2 B5 B6 80.97(16) . . ? 
B9 B5 B6 105.57(19) . . ? 
B4 B5 B6 111.83(17) . . ? 
B10 B6 C1 122.55(18) . . ? 
B10 B6 B11 60.5(2) . . ? 
C1 B6 B11 103.88(18) . . ? 
B10 B6 B7 107.6(2) . . ? 
C1 B6 B7 51.79(13) . . ? 
B11 B6 B7 56.63(17) . . ? 
B10 B6 B5 56.09(17) . . ? 
C1 B6 B5 81.93(15) . . ? 
B11 B6 B5 105.64(18) . . ? 
B7 B6 B5 113.04(17) . . ? 
C1 B7 B11 117.7(2) . . ? 
C1 B7 B12 114.71(19) . . ? 
B11 B7 B12 59.44(18) . . ? 
C1 B7 B6 62.76(16) . . ? 
B11 B7 B6 60.90(18) . . ? 
B12 B7 B6 104.7(2) . . ? 
C1 B7 B3 61.26(14) . . ? 
B11 B7 B3 104.0(2) . . ? 
B12 B7 B3 58.37(15) . . ? 
B6 B7 B3 99.01(17) . . ? 
B12 B8 B13 61.0(2) . . ? 
B12 B8 B9 110.0(2) . . ? 
B13 B8 B9 59.75(19) . . ? 
B12 B8 B4 116.85(19) . . ? 
B13 B8 B4 110.1(2) . . ? 
B9 B8 B4 58.29(16) . . ? 
B12 B8 B3 61.63(17) . . ? 
B13 B8 B3 109.7(2) . . ? 
B9 B8 B3 109.56(18) . . ? 
B4 B8 B3 66.35(15) . . ? 
B4 B9 B13 112.9(2) . . ? 
B4 B9 B8 61.67(17) . . ? 
B13 B9 B8 59.66(19) . . ? 
B4 B9 B10 109.73(19) . . ? 
B13 B9 B10 60.0(2) . . ? 
B8 B9 B10 104.8(2) . . ? 
B4 B9 B5 62.36(15) . . ? 
B13 B9 B5 108.5(2) . . ? 
B8 B9 B5 107.15(18) . . ? 
B10 B9 B5 58.11(16) . . ? 
B5 B10 B6 67.79(17) . . ? 
B5 B10 B13 110.5(2) . . ? 
B6 B10 B13 110.6(2) . . ? 
B5 B10 B9 61.47(18) . . ? 
B6 B10 B9 115.58(19) . . ? 
B13 B10 B9 59.15(19) . . ? 
B5 B10 B11 115.73(19) . . ? 
B6 B10 B11 61.56(19) . . ? 
B13 B10 B11 59.2(2) . . ? 
B9 B10 B11 109.3(2) . . ? 
B7 B11 B12 61.95(19) . . ? 
B7 B11 B13 113.8(2) . . ? 
B12 B11 B13 60.8(2) . . ? 
B7 B11 B10 110.3(2) . . ? 
B12 B11 B10 106.2(2) . . ? 
B13 B11 B10 59.8(2) . . ? 
B7 B11 B6 62.46(16) . . ? 
B12 B11 B6 107.71(19) . . ? 
B13 B11 B6 108.1(2) . . ? 
B10 B11 B6 57.97(17) . . ? 
B8 B12 B11 109.0(2) . . ? 
B8 B12 B13 59.8(2) . . ? 
B11 B12 B13 60.0(2) . . ? 
B8 B12 B7 116.2(2) . . ? 
B11 B12 B7 58.61(17) . . ? 
B13 B12 B7 110.3(2) . . ? 
B8 B12 B3 61.75(16) . . ? 
B11 B12 B3 109.0(2) . . ? 
B13 B12 B3 108.9(2) . . ? 
B7 B12 B3 65.70(16) . . ? 
B8 B13 B9 60.59(18) . . ? 
B8 B13 B11 107.9(2) . . ? 
B9 B13 B11 112.2(2) . . ? 
B8 B13 B10 106.1(2) . . ? 
B9 B13 B10 60.86(19) . . ? 
B11 B13 B10 60.9(2) . . ? 
B8 B13 B12 59.24(18) . . ? 
B9 B13 B12 109.2(2) . . ? 
B11 B13 B12 59.2(2) . . ? 
B10 B13 B12 105.8(2) . . ? 
 
_diffrn_measured_fraction_theta_max    0.995 
_diffrn_reflns_theta_full              27.66 
_diffrn_measured_fraction_theta_full   0.995 
_refine_diff_density_max    0.323 
_refine_diff_density_min   -0.169 
_refine_diff_density_rms    0.048 
#===END

data_2 
 
_audit_creation_method            SHELXL-97 
_chemical_name_systematic 
; 
 ? 
; 
_chemical_name_common             ? 
_chemical_melting_point           ? 
_chemical_formula_moiety          ? 
_chemical_formula_sum 
 'C10 H30 B11 N' 
_chemical_formula_weight          283.26 
 
loop_ 
 _atom_type_symbol 
 _atom_type_description 
 _atom_type_scat_dispersion_real 
 _atom_type_scat_dispersion_imag 
 _atom_type_scat_source 
 'C'  'C'   0.0033   0.0016 
 'International Tables Vol C Tables 4.2.6.8 and 6.1.1.4' 
 'H'  'H'   0.0000   0.0000 
 'International Tables Vol C Tables 4.2.6.8 and 6.1.1.4' 
 'B'  'B'   0.0013   0.0007 
 'International Tables Vol C Tables 4.2.6.8 and 6.1.1.4' 
 'N'  'N'   0.0061   0.0033 
 'International Tables Vol C Tables 4.2.6.8 and 6.1.1.4' 
 
_symmetry_cell_setting            Monoclinic 
_symmetry_space_group_name_H-M    P2(1)/c 
 
loop_ 
 _symmetry_equiv_pos_as_xyz 
 'x, y, z' 
 '-x, y+1/2, -z+1/2' 
 '-x, -y, -z' 
 'x, -y-1/2, z-1/2' 
 
_cell_length_a                    7.4647(12) 
_cell_length_b                    14.673(2) 
_cell_length_c                    16.269(3) 
_cell_angle_alpha                 90.00 
_cell_angle_beta                  94.198(3) 
_cell_angle_gamma                 90.00 
_cell_volume                      1777.1(5) 
_cell_formula_units_Z             4 
_cell_measurement_temperature     293(2) 
_cell_measurement_reflns_used     76
_cell_measurement_theta_min       -14 
_cell_measurement_theta_max       14 
 
_exptl_crystal_description        block
_exptl_crystal_colour             colourless
_exptl_crystal_size_max           0.50 
_exptl_crystal_size_mid           0.40 
_exptl_crystal_size_min           0.30 
_exptl_crystal_density_meas       ? 
_exptl_crystal_density_diffrn     1.059 
_exptl_crystal_density_method     'not measured' 
_exptl_crystal_F_000              608 
_exptl_absorpt_coefficient_mu     0.051 
_exptl_absorpt_correction_type    multi-scan
_exptl_absorpt_correction_T_min   0.551190 
_exptl_absorpt_correction_T_max   1.0000
_exptl_absorpt_process_details    ? 
 
_exptl_special_details 
; 
 ? 
; 
 
_diffrn_ambient_temperature       293(2) 
_diffrn_radiation_wavelength      0.71073 
_diffrn_radiation_type            MoK\a 
_diffrn_radiation_source          'fine-focus sealed tube' 
_diffrn_radiation_monochromator   graphite 
_diffrn_measurement_device_type   'BRUKER SMART CCD DIFFRACTOMETER'
_diffrn_measurement_method        'PHI & OMEGA SCAN'
_diffrn_detector_area_resol_mean  ? 
_diffrn_reflns_number             11855 
_diffrn_reflns_av_R_equivalents   0.0356 
_diffrn_reflns_av_sigmaI/netI     0.0376 
_diffrn_reflns_limit_h_min        -9 
_diffrn_reflns_limit_h_max        9 
_diffrn_reflns_limit_k_min        -13 
_diffrn_reflns_limit_k_max        19 
_diffrn_reflns_limit_l_min        -21 
_diffrn_reflns_limit_l_max        21 
_diffrn_reflns_theta_min          1.87 
_diffrn_reflns_theta_max          28.02 
_reflns_number_total              4253 
_reflns_number_gt                 3217 
_reflns_threshold_expression      >2sigma(I) 
 
_computing_data_collection        'BRUKER SMART CCD DIFFRACTOMETER' 
_computing_cell_refinement        'BRUKER SMART CCD DIFFRACTOMETER' 
_computing_data_reduction         'BRUKER SMART CCD DIFFRACTOMETER' 
_computing_structure_solution     'SHELXS-97 (Sheldrick, 2008)' 
_computing_structure_refinement   'SHELXL-97 (Sheldrick, 2008)' 
_computing_molecular_graphics     'SIEMENS SHELXTL'
_computing_publication_material   'SIEMENS SHELXTL' 
 
_refine_special_details 
; 
 Refinement of F^2^ against ALL reflections.  The weighted R-factor wR and 
 goodness of fit S are based on F^2^, conventional R-factors R are based 
 on F, with F set to zero for negative F^2^. The threshold expression of 
 F^2^ > 2sigma(F^2^) is used only for calculating R-factors(gt) etc. and is 
 not relevant to the choice of reflections for refinement.  R-factors based 
 on F^2^ are statistically about twice as large as those based on F, and R- 
 factors based on ALL data will be even larger. 
; 
 
_refine_ls_structure_factor_coef  Fsqd  
_refine_ls_matrix_type            full 
_refine_ls_weighting_scheme       calc  
_refine_ls_weighting_details 
 'calc w=1/[\s^2^(Fo^2^)+(0.1209P)^2^+0.3593P] where P=(Fo^2^+2Fc^2^)/3' 
_atom_sites_solution_primary      direct 
_atom_sites_solution_secondary    difmap 
_atom_sites_solution_hydrogens    geom 
_refine_ls_hydrogen_treatment     riding
_refine_ls_extinction_method      none 
_refine_ls_extinction_coef        ? 
_refine_ls_number_reflns          4253 
_refine_ls_number_parameters      207 
_refine_ls_number_restraints      0 
_refine_ls_R_factor_all           0.0775 
_refine_ls_R_factor_gt            0.0592 
_refine_ls_wR_factor_ref          0.1954 
_refine_ls_wR_factor_gt           0.1735 
_refine_ls_goodness_of_fit_ref    1.011 
_refine_ls_restrained_S_all       1.011 
_refine_ls_shift/su_max           0.000 
_refine_ls_shift/su_mean          0.000 
 
loop_ 
 _atom_site_label 
 _atom_site_type_symbol 
 _atom_site_fract_x 
 _atom_site_fract_y 
 _atom_site_fract_z 
 _atom_site_U_iso_or_equiv 
 _atom_site_adp_type 
 _atom_site_occupancy 
 _atom_site_symmetry_multiplicity 
 _atom_site_calc_flag 
 _atom_site_refinement_flags 
 _atom_site_disorder_assembly 
 _atom_site_disorder_group 
N1 N 0.34852(17) 0.13105(8) 0.43509(7) 0.0359(3) Uani 1 1 d . . . 
H1A H 0.4252 0.1040 0.4738 0.043 Uiso 1 1 calc R . . 
C1 C 0.2458(2) 0.01030(10) 0.20083(8) 0.0362(3) Uani 1 1 d . . . 
C3 C 0.07102(19) -0.01527(11) 0.24298(9) 0.0371(3) Uani 1 1 d . . . 
C11 C 0.2308(3) 0.05513(13) 0.11464(10) 0.0527(5) Uani 1 1 d . . . 
H11A H 0.3352 0.0933 0.1088 0.063 Uiso 1 1 calc R . . 
H11B H 0.2300 0.0080 0.0728 0.063 Uiso 1 1 calc R . . 
C12 C 0.0641(4) 0.11178(19) 0.10095(14) 0.0804(7) Uani 1 1 d . . . 
H12A H 0.0520 0.1316 0.0439 0.097 Uiso 1 1 calc R . . 
H12B H 0.0760 0.1657 0.1354 0.097 Uiso 1 1 calc R . . 
C13 C -0.1022(3) 0.0609(2) 0.12014(14) 0.0804(7) Uani 1 1 d . . . 
H13A H -0.1131 0.0063 0.0866 0.097 Uiso 1 1 calc R . . 
H13B H -0.2067 0.0987 0.1062 0.097 Uiso 1 1 calc R . . 
C14 C -0.0980(2) 0.03480(15) 0.21024(11) 0.0552(5) Uani 1 1 d . . . 
H14A H -0.2011 -0.0035 0.2184 0.066 Uiso 1 1 calc R . . 
H14B H -0.1100 0.0897 0.2426 0.066 Uiso 1 1 calc R . . 
C15 C 0.4478(3) 0.21217(12) 0.40374(10) 0.0510(4) Uani 1 1 d . . . 
H15A H 0.5563 0.1907 0.3807 0.061 Uiso 1 1 calc R . . 
H15B H 0.3733 0.2404 0.3595 0.061 Uiso 1 1 calc R . . 
C17 C 0.4986(3) 0.28344(13) 0.46781(12) 0.0620(5) Uani 1 1 d . . . 
H17A H 0.5608 0.3324 0.4430 0.093 Uiso 1 1 calc R . . 
H17B H 0.5753 0.2568 0.5113 0.093 Uiso 1 1 calc R . . 
H17C H 0.3920 0.3066 0.4900 0.093 Uiso 1 1 calc R . . 
C18 C 0.1818(2) 0.15522(12) 0.47829(9) 0.0444(4) Uani 1 1 d . . . 
H18A H 0.1293 0.0997 0.4983 0.053 Uiso 1 1 calc R . . 
H18B H 0.2161 0.1932 0.5257 0.053 Uiso 1 1 calc R . . 
C19 C 0.0428(3) 0.20473(16) 0.42337(12) 0.0660(6) Uani 1 1 d . . . 
H19A H -0.0595 0.2182 0.4538 0.099 Uiso 1 1 calc R . . 
H19B H 0.0061 0.1670 0.3769 0.099 Uiso 1 1 calc R . . 
H19C H 0.0929 0.2605 0.4044 0.099 Uiso 1 1 calc R . . 
B2 B 0.3885(2) 0.05833(12) 0.26351(10) 0.0368(4) Uani 1 1 d . . . 
H2 H 0.4228 0.1260 0.2403 0.044 Uiso 1 1 calc R . . 
B4 B 0.1781(2) -0.09728(13) 0.18959(11) 0.0416(4) Uani 1 1 d . . . 
H4 H 0.1452 -0.1239 0.1271 0.050 Uiso 1 1 calc R . . 
B5 B 0.4113(2) -0.07375(13) 0.23705(11) 0.0398(4) Uani 1 1 d . . . 
B6 B 0.4821(2) -0.01421(12) 0.34038(10) 0.0376(4) Uani 1 1 d . . . 
H6 H 0.6222 0.0013 0.3615 0.045 Uiso 1 1 calc R . . 
B7 B 0.3070(2) 0.05735(11) 0.36549(9) 0.0329(3) Uani 1 1 d . . . 
B8 B 0.0526(3) -0.12496(13) 0.27154(12) 0.0448(4) Uani 1 1 d . . . 
H8 H -0.0737 -0.1635 0.2624 0.054 Uiso 1 1 calc R . . 
B9 B 0.2669(3) -0.17353(13) 0.26354(12) 0.0462(4) Uani 1 1 d . . . 
H9 H 0.2889 -0.2441 0.2437 0.055 Uiso 1 1 calc R . . 
B10 B 0.4188(3) -0.12967(13) 0.33956(11) 0.0441(4) Uani 1 1 d . . . 
H10 H 0.5271 -0.1763 0.3619 0.053 Uiso 1 1 calc R . . 
B11 B 0.3102(2) -0.05274(12) 0.40284(10) 0.0369(4) Uani 1 1 d . . . 
H11 H 0.3244 -0.0537 0.4706 0.044 Uiso 1 1 calc R . . 
B12 B 0.0962(2) -0.02840(12) 0.34608(10) 0.0364(4) Uani 1 1 d . . . 
H12 H -0.0160 0.0086 0.3710 0.044 Uiso 1 1 calc R . . 
B13 B 0.1904(3) -0.14466(13) 0.36096(11) 0.0443(4) Uani 1 1 d . . . 
H13 H 0.1432 -0.1953 0.4043 0.053 Uiso 1 1 calc R . . 
H7 H 0.256(2) 0.1018(12) 0.3072(11) 0.043(5) Uiso 1 1 d . . . 
H5 H 0.515(3) -0.0865(14) 0.1964(13) 0.062(6) Uiso 1 1 d . . . 
 
loop_ 
 _atom_site_aniso_label 
 _atom_site_aniso_U_11 
 _atom_site_aniso_U_22 
 _atom_site_aniso_U_33 
 _atom_site_aniso_U_23 
 _atom_site_aniso_U_13 
 _atom_site_aniso_U_12 
N1 0.0399(7) 0.0383(6) 0.0295(6) 0.0001(5) 0.0033(5) 0.0022(5) 
C1 0.0378(8) 0.0430(8) 0.0280(6) 0.0015(5) 0.0043(5) -0.0044(6) 
C3 0.0299(7) 0.0468(8) 0.0343(7) 0.0008(6) 0.0007(5) -0.0034(6) 
C11 0.0691(12) 0.0611(11) 0.0281(7) 0.0057(7) 0.0041(7) -0.0097(9) 
C12 0.0999(19) 0.0856(16) 0.0554(12) 0.0281(11) 0.0036(12) 0.0172(14) 
C13 0.0718(15) 0.1083(19) 0.0576(12) 0.0139(12) -0.0200(10) 0.0231(13) 
C14 0.0383(9) 0.0741(12) 0.0517(10) 0.0025(9) -0.0074(7) 0.0083(8) 
C15 0.0672(11) 0.0470(9) 0.0400(8) -0.0034(7) 0.0119(8) -0.0134(8) 
C17 0.0922(15) 0.0488(10) 0.0448(9) -0.0036(8) 0.0036(9) -0.0178(10) 
C18 0.0488(9) 0.0544(9) 0.0309(7) -0.0021(6) 0.0088(6) 0.0087(7) 
C19 0.0643(12) 0.0812(15) 0.0522(10) -0.0041(9) 0.0023(9) 0.0339(10) 
B2 0.0363(8) 0.0429(9) 0.0319(8) -0.0011(6) 0.0068(6) -0.0077(6) 
B4 0.0430(9) 0.0454(9) 0.0365(8) -0.0065(7) 0.0026(7) -0.0083(7) 
B5 0.0356(8) 0.0478(10) 0.0367(8) -0.0083(7) 0.0064(6) -0.0012(7) 
B6 0.0281(8) 0.0492(10) 0.0356(8) -0.0055(7) 0.0022(6) 0.0019(6) 
B7 0.0315(8) 0.0389(8) 0.0288(7) -0.0009(6) 0.0047(6) -0.0011(6) 
B8 0.0435(9) 0.0474(10) 0.0438(9) -0.0006(7) 0.0044(7) -0.0139(8) 
B9 0.0528(11) 0.0401(9) 0.0457(10) -0.0048(7) 0.0040(8) -0.0007(8) 
B10 0.0464(10) 0.0438(9) 0.0415(9) -0.0001(7) 0.0002(7) 0.0088(7) 
B11 0.0388(8) 0.0413(9) 0.0304(7) 0.0025(6) 0.0020(6) 0.0041(7) 
B12 0.0311(8) 0.0449(9) 0.0338(8) 0.0036(6) 0.0068(6) -0.0017(6) 
B13 0.0522(10) 0.0398(9) 0.0414(9) 0.0050(7) 0.0061(8) -0.0052(7) 
 
_geom_special_details 
; 
 All esds (except the esd in the dihedral angle between two l.s. planes) 
 are estimated using the full covariance matrix.  The cell esds are taken 
 into account individually in the estimation of esds in distances, angles 
 and torsion angles; correlations between esds in cell parameters are only 
 used when they are defined by crystal symmetry.  An approximate (isotropic) 
 treatment of cell esds is used for estimating esds involving l.s. planes. 
; 
 
loop_ 
 _geom_bond_atom_site_label_1 
 _geom_bond_atom_site_label_2 
 _geom_bond_distance 
 _geom_bond_site_symmetry_2 
 _geom_bond_publ_flag 
N1 C15 1.510(2) . ? 
N1 C18 1.5151(19) . ? 
N1 B7 1.580(2) . ? 
C1 C11 1.545(2) . ? 
C1 C3 1.563(2) . ? 
C1 B2 1.585(2) . ? 
C1 B4 1.663(2) . ? 
C1 B5 1.813(2) . ? 
C3 C14 1.522(2) . ? 
C3 B8 1.684(2) . ? 
C3 B12 1.685(2) . ? 
C3 B4 1.716(2) . ? 
C11 C12 1.499(3) . ? 
C12 C13 1.501(4) . ? 
C13 C14 1.513(3) . ? 
C15 C17 1.505(2) . ? 
C18 C19 1.506(2) . ? 
B2 B6 1.748(2) . ? 
B2 B7 1.808(2) . ? 
B2 B5 1.995(3) . ? 
B4 B8 1.733(3) . ? 
B4 B9 1.738(3) . ? 
B4 B5 1.884(3) . ? 
B5 B10 1.856(3) . ? 
B5 B9 1.887(3) . ? 
B5 B6 1.933(2) . ? 
B6 B7 1.748(2) . ? 
B6 B10 1.759(3) . ? 
B6 B11 1.786(2) . ? 
B7 B11 1.725(2) . ? 
B7 B12 2.022(2) . ? 
B8 B13 1.743(3) . ? 
B8 B9 1.765(3) . ? 
B8 B12 1.878(3) . ? 
B9 B10 1.739(3) . ? 
B9 B13 1.775(3) . ? 
B10 B11 1.764(2) . ? 
B10 B13 1.779(3) . ? 
B11 B13 1.731(3) . ? 
B11 B12 1.822(2) . ? 
B12 B13 1.854(3) . ? 
 
loop_ 
 _geom_angle_atom_site_label_1 
 _geom_angle_atom_site_label_2 
 _geom_angle_atom_site_label_3 
 _geom_angle 
 _geom_angle_site_symmetry_1 
 _geom_angle_site_symmetry_3 
 _geom_angle_publ_flag 
C15 N1 C18 114.34(13) . . ? 
C15 N1 B7 111.88(11) . . ? 
C18 N1 B7 111.60(12) . . ? 
C11 C1 C3 119.54(13) . . ? 
C11 C1 B2 113.26(13) . . ? 
C3 C1 B2 111.57(11) . . ? 
C11 C1 B4 107.64(12) . . ? 
C3 C1 B4 64.15(10) . . ? 
B2 C1 B4 132.61(13) . . ? 
C11 C1 B5 125.91(13) . . ? 
C3 C1 B5 105.37(11) . . ? 
B2 C1 B5 71.53(10) . . ? 
B4 C1 B5 65.46(10) . . ? 
C14 C3 C1 115.31(13) . . ? 
C14 C3 B8 118.40(14) . . ? 
C1 C3 B8 115.99(13) . . ? 
C14 C3 B12 115.63(13) . . ? 
C1 C3 B12 115.36(11) . . ? 
B8 C3 B12 67.76(10) . . ? 
C14 C3 B4 124.50(13) . . ? 
C1 C3 B4 60.75(10) . . ? 
B8 C3 B4 61.30(11) . . ? 
B12 C3 B4 113.69(12) . . ? 
C12 C11 C1 112.01(15) . . ? 
C11 C12 C13 112.6(2) . . ? 
C12 C13 C14 111.61(19) . . ? 
C13 C14 C3 114.80(16) . . ? 
C17 C15 N1 114.75(13) . . ? 
C19 C18 N1 113.05(13) . . ? 
C1 B2 B6 113.84(13) . . ? 
C1 B2 B7 109.35(11) . . ? 
B6 B2 B7 58.84(9) . . ? 
C1 B2 B5 59.56(9) . . ? 
B6 B2 B5 61.78(10) . . ? 
B7 B2 B5 103.30(11) . . ? 
C1 B4 C3 55.09(9) . . ? 
C1 B4 B8 108.35(12) . . ? 
C3 B4 B8 58.44(10) . . ? 
C1 B4 B9 115.94(13) . . ? 
C3 B4 B9 105.61(12) . . ? 
B8 B4 B9 61.12(11) . . ? 
C1 B4 B5 61.12(10) . . ? 
C3 B4 B5 96.59(11) . . ? 
B8 B4 B5 105.26(12) . . ? 
B9 B4 B5 62.63(11) . . ? 
C1 B5 B10 124.59(12) . . ? 
C1 B5 B4 53.42(9) . . ? 
B10 B5 B4 104.68(12) . . ? 
C1 B5 B9 102.39(12) . . ? 
B10 B5 B9 55.37(10) . . ? 
B4 B5 B9 54.91(10) . . ? 
C1 B5 B6 96.41(10) . . ? 
B10 B5 B6 55.26(10) . . ? 
B4 B5 B6 128.66(12) . . ? 
B9 B5 B6 106.04(12) . . ? 
C1 B5 B2 48.90(8) . . ? 
B10 B5 B2 103.48(11) . . ? 
B4 B5 B2 100.10(11) . . ? 
B9 B5 B2 130.18(12) . . ? 
B6 B5 B2 52.83(8) . . ? 
B7 B6 B2 62.29(9) . . ? 
B7 B6 B10 112.05(12) . . ? 
B2 B6 B10 119.20(12) . . ? 
B7 B6 B11 58.44(9) . . ? 
B2 B6 B11 109.48(12) . . ? 
B10 B6 B11 59.71(10) . . ? 
B7 B6 B5 108.25(11) . . ? 
B2 B6 B5 65.39(10) . . ? 
B10 B6 B5 60.13(10) . . ? 
B11 B6 B5 100.93(11) . . ? 
N1 B7 B11 113.05(11) . . ? 
N1 B7 B6 117.89(12) . . ? 
B11 B7 B6 61.88(10) . . ? 
N1 B7 B2 126.20(12) . . ? 
B11 B7 B2 109.48(11) . . ? 
B6 B7 B2 58.86(9) . . ? 
N1 B7 B12 130.35(11) . . ? 
B11 B7 B12 57.52(9) . . ? 
B6 B7 B12 100.17(11) . . ? 
B2 B7 B12 99.90(10) . . ? 
C3 B8 B4 60.26(10) . . ? 
C3 B8 B13 109.49(13) . . ? 
B4 B8 B13 111.20(13) . . ? 
C3 B8 B9 105.83(12) . . ? 
B4 B8 B9 59.59(11) . . ? 
B13 B8 B9 60.78(11) . . ? 
C3 B8 B12 56.16(9) . . ? 
B4 B8 B12 104.01(12) . . ? 
B13 B8 B12 61.47(10) . . ? 
B9 B8 B12 103.71(12) . . ? 
B4 B9 B10 116.73(14) . . ? 
B4 B9 B8 59.29(11) . . ? 
B10 B9 B8 110.22(13) . . ? 
B4 B9 B13 109.46(13) . . ? 
B10 B9 B13 60.82(11) . . ? 
B8 B9 B13 59.01(11) . . ? 
B4 B9 B5 62.47(10) . . ? 
B10 B9 B5 61.41(11) . . ? 
B8 B9 B5 103.87(13) . . ? 
B13 B9 B5 104.21(12) . . ? 
B9 B10 B6 121.52(13) . . ? 
B9 B10 B11 110.37(13) . . ? 
B6 B10 B11 60.91(10) . . ? 
B9 B10 B13 60.58(11) . . ? 
B6 B10 B13 112.24(13) . . ? 
B11 B10 B13 58.46(10) . . ? 
B9 B10 B5 63.22(11) . . ? 
B6 B10 B5 64.61(10) . . ? 
B11 B10 B5 104.86(12) . . ? 
B13 B10 B5 105.32(12) . . ? 
B7 B11 B13 126.70(12) . . ? 
B7 B11 B10 112.87(12) . . ? 
B13 B11 B10 61.19(11) . . ? 
B7 B11 B6 59.69(9) . . ? 
B13 B11 B6 113.27(12) . . ? 
B10 B11 B6 59.38(10) . . ? 
B7 B11 B12 69.44(10) . . ? 
B13 B11 B12 62.88(10) . . ? 
B10 B11 B12 104.66(12) . . ? 
B6 B11 B12 106.84(11) . . ? 
C3 B12 B11 123.83(11) . . ? 
C3 B12 B13 104.40(12) . . ? 
B11 B12 B13 56.16(9) . . ? 
C3 B12 B8 56.08(9) . . ? 
B11 B12 B8 106.47(12) . . ? 
B13 B12 B8 55.69(10) . . ? 
C3 B12 B7 96.49(10) . . ? 
B11 B12 B7 53.04(8) . . ? 
B13 B12 B7 105.58(11) . . ? 
B8 B12 B7 131.80(11) . . ? 
B11 B13 B8 117.11(13) . . ? 
B11 B13 B9 110.28(13) . . ? 
B8 B13 B9 60.21(11) . . ? 
B11 B13 B10 60.35(10) . . ? 
B8 B13 B10 109.37(13) . . ? 
B9 B13 B10 58.59(10) . . ? 
B11 B13 B12 60.96(10) . . ? 
B8 B13 B12 62.84(10) . . ? 
B9 B13 B12 104.28(12) . . ? 
B10 B13 B12 102.74(12) . . ? 
 
_diffrn_measured_fraction_theta_max    0.990 
_diffrn_reflns_theta_full              28.02 
_diffrn_measured_fraction_theta_full   0.990 
_refine_diff_density_max    0.486 
_refine_diff_density_min   -0.366 
_refine_diff_density_rms    0.048 
#===END


data_[3][PPN] 
 
_audit_creation_method            SHELXL-97 
_chemical_name_systematic 
; 
 ? 
; 
_chemical_name_common             ? 
_chemical_melting_point           ? 
_chemical_formula_moiety          ? 
_chemical_formula_sum 
 'C44 H55 B11 N2 P2' 
_chemical_formula_weight          792.75 
 
loop_ 
 _atom_type_symbol 
 _atom_type_description 
 _atom_type_scat_dispersion_real 
 _atom_type_scat_dispersion_imag 
 _atom_type_scat_source 
 'C'  'C'   0.0033   0.0016 
 'International Tables Vol C Tables 4.2.6.8 and 6.1.1.4' 
 'H'  'H'   0.0000   0.0000 
 'International Tables Vol C Tables 4.2.6.8 and 6.1.1.4' 
 'B'  'B'   0.0013   0.0007 
 'International Tables Vol C Tables 4.2.6.8 and 6.1.1.4' 
 'N'  'N'   0.0061   0.0033 
 'International Tables Vol C Tables 4.2.6.8 and 6.1.1.4' 
 'P'  'P'   0.1023   0.0942 
 'International Tables Vol C Tables 4.2.6.8 and 6.1.1.4' 
 
_symmetry_cell_setting            Monoclinic 
_symmetry_space_group_name_H-M    P2(1)/c 
 
loop_ 
 _symmetry_equiv_pos_as_xyz 
 'x, y, z' 
 '-x, y+1/2, -z+1/2' 
 '-x, -y, -z' 
 'x, -y-1/2, z-1/2' 
 
_cell_length_a                    13.3528(12) 
_cell_length_b                    9.1868(9) 
_cell_length_c                    37.516(4) 
_cell_angle_alpha                 90.00 
_cell_angle_beta                  100.747(2) 
_cell_angle_gamma                 90.00 
_cell_volume                      4521.3(8) 
_cell_formula_units_Z             4 
_cell_measurement_temperature     296(2) 
_cell_measurement_reflns_used     2138 
_cell_measurement_theta_min       15 
_cell_measurement_theta_max       15 
 
_exptl_crystal_description        block 
_exptl_crystal_colour             colourless 
_exptl_crystal_size_max           0.50 
_exptl_crystal_size_mid           0.40 
_exptl_crystal_size_min           0.30 
_exptl_crystal_density_meas       ? 
_exptl_crystal_density_diffrn     1.165 
_exptl_crystal_density_method     'not measured' 
_exptl_crystal_F_000              1672 
_exptl_absorpt_coefficient_mu     0.130 
_exptl_absorpt_correction_type    multi-scan 
_exptl_absorpt_correction_T_min   0.6238  
_exptl_absorpt_correction_T_max   0.7456  
_exptl_absorpt_process_details    ? 
 
_exptl_special_details 
; 
 ? 
; 
 
_diffrn_ambient_temperature       296(2) 
_diffrn_radiation_wavelength      0.71073 
_diffrn_radiation_type            MoK\a 
_diffrn_radiation_source          'fine-focus sealed tube' 
_diffrn_radiation_monochromator   graphite 
_diffrn_measurement_device_type   'BRUKER KAPPA APEXII DUO DIFFRACTOMETER'
_diffrn_measurement_method        'PHI & OMEGA SCAN' 
_diffrn_detector_area_resol_mean  ? 
_diffrn_reflns_number             52309 
_diffrn_reflns_av_R_equivalents   0.0470 
_diffrn_reflns_av_sigmaI/netI     0.0351 
_diffrn_reflns_limit_h_min        -16 
_diffrn_reflns_limit_h_max        17 
_diffrn_reflns_limit_k_min        -12 
_diffrn_reflns_limit_k_max        12 
_diffrn_reflns_limit_l_min        -49 
_diffrn_reflns_limit_l_max        49 
_diffrn_reflns_theta_min          1.10 
_diffrn_reflns_theta_max          28.07 
_reflns_number_total              10877 
_reflns_number_gt                 9121 
_reflns_threshold_expression      >2sigma(I) 
 
_computing_data_collection        'BRUKER KAPPA APEXII DUO DIFFRACTOMETER' 
_computing_cell_refinement        'BRUKER KAPPA APEXII DUO DIFFRACTOMETER' 
_computing_data_reduction         'BRUKER KAPPA APEXII DUO DIFFRACTOMETER' 
_computing_structure_solution     'SHELXS-97 (Sheldrick, 2008)' 
_computing_structure_refinement   'SHELXL-97 (Sheldrick, 2008)' 
_computing_molecular_graphics     'SIEMENS SHELXTL' 
_computing_publication_material   'SIEMENS SHELXTL'  
 
_refine_special_details 
; 
 Refinement of F^2^ against ALL reflections.  The weighted R-factor wR and 
 goodness of fit S are based on F^2^, conventional R-factors R are based 
 on F, with F set to zero for negative F^2^. The threshold expression of 
 F^2^ > 2sigma(F^2^) is used only for calculating R-factors(gt) etc. and is 
 not relevant to the choice of reflections for refinement.  R-factors based 
 on F^2^ are statistically about twice as large as those based on F, and R- 
 factors based on ALL data will be even larger. 
; 
 
_refine_ls_structure_factor_coef  Fsqd  
_refine_ls_matrix_type            full 
_refine_ls_weighting_scheme       calc  
_refine_ls_weighting_details 
 'calc w=1/[\s^2^(Fo^2^)+(0.0236P)^2^+9.2466P] where P=(Fo^2^+2Fc^2^)/3' 
_atom_sites_solution_primary      direct 
_atom_sites_solution_secondary    difmap 
_atom_sites_solution_hydrogens    geom 
_refine_ls_hydrogen_treatment     riding
_refine_ls_extinction_method      none 
_refine_ls_extinction_coef        ? 
_refine_ls_number_reflns          10877 
_refine_ls_number_parameters      532 
_refine_ls_number_restraints      0 
_refine_ls_R_factor_all           0.1029 
_refine_ls_R_factor_gt            0.0892 
_refine_ls_wR_factor_ref          0.1996 
_refine_ls_wR_factor_gt           0.1931 
_refine_ls_goodness_of_fit_ref    1.238 
_refine_ls_restrained_S_all       1.238 
_refine_ls_shift/su_max           0.000 
_refine_ls_shift/su_mean          0.000 
 
loop_ 
 _atom_site_label 
 _atom_site_type_symbol 
 _atom_site_fract_x 
 _atom_site_fract_y 
 _atom_site_fract_z 
 _atom_site_U_iso_or_equiv 
 _atom_site_adp_type 
 _atom_site_occupancy 
 _atom_site_symmetry_multiplicity 
 _atom_site_calc_flag 
 _atom_site_refinement_flags 
 _atom_site_disorder_assembly 
 _atom_site_disorder_group 
N1 N 0.7726(3) 0.4034(4) 0.15637(10) 0.0536(8) Uani 1 1 d . . . 
N2 N 0.2041(2) 0.2086(3) 0.12910(7) 0.0338(6) Uani 1 1 d . . . 
P1 P 0.20502(6) 0.27800(9) 0.09020(2) 0.02836(17) Uani 1 1 d . . . 
P2 P 0.24311(7) 0.23925(9) 0.17080(2) 0.03212(19) Uani 1 1 d . . . 
C21 C 0.2179(2) 0.4730(3) 0.08947(8) 0.0332(7) Uani 1 1 d . . . 
C22 C 0.1372(3) 0.5567(4) 0.09668(10) 0.0426(8) Uani 1 1 d . . . 
H22A H 0.0788 0.5112 0.1013 0.051 Uiso 1 1 calc R . . 
C23 C 0.1431(3) 0.7068(4) 0.09710(12) 0.0556(10) Uani 1 1 d . . . 
H23A H 0.0890 0.7620 0.1020 0.067 Uiso 1 1 calc R . . 
C24 C 0.2303(4) 0.7748(4) 0.09008(12) 0.0597(12) Uani 1 1 d . . . 
H24A H 0.2344 0.8759 0.0902 0.072 Uiso 1 1 calc R . . 
C25 C 0.3102(4) 0.6930(5) 0.08297(12) 0.0574(11) Uani 1 1 d . . . 
H25A H 0.3687 0.7391 0.0785 0.069 Uiso 1 1 calc R . . 
C26 C 0.3048(3) 0.5417(4) 0.08241(10) 0.0433(8) Uani 1 1 d . . . 
H26A H 0.3590 0.4870 0.0773 0.052 Uiso 1 1 calc R . . 
C27 C 0.3046(3) 0.1943(4) 0.07049(9) 0.0355(7) Uani 1 1 d . . . 
C28 C 0.4033(3) 0.1896(4) 0.09113(10) 0.0450(8) Uani 1 1 d . . . 
H28A H 0.4177 0.2362 0.1135 0.054 Uiso 1 1 calc R . . 
C29 C 0.4794(3) 0.1159(5) 0.07827(12) 0.0569(11) Uani 1 1 d . . . 
H29A H 0.5448 0.1118 0.0921 0.068 Uiso 1 1 calc R . . 
C30 C 0.4581(4) 0.0484(5) 0.04485(13) 0.0640(13) Uani 1 1 d . . . 
H30A H 0.5089 -0.0034 0.0364 0.077 Uiso 1 1 calc R . . 
C31 C 0.3620(4) 0.0574(5) 0.02396(13) 0.0631(12) Uani 1 1 d . . . 
H31A H 0.3488 0.0138 0.0012 0.076 Uiso 1 1 calc R . . 
C32 C 0.2848(3) 0.1307(5) 0.03645(11) 0.0500(9) Uani 1 1 d . . . 
H32A H 0.2201 0.1371 0.0221 0.060 Uiso 1 1 calc R . . 
C33 C 0.0872(2) 0.2359(3) 0.06037(8) 0.0330(6) Uani 1 1 d . . . 
C34 C 0.0623(3) 0.3083(4) 0.02735(9) 0.0425(8) Uani 1 1 d . . . 
H34A H 0.1036 0.3833 0.0218 0.051 Uiso 1 1 calc R . . 
C35 C -0.0243(3) 0.2690(5) 0.00259(11) 0.0530(10) Uani 1 1 d . . . 
H35A H -0.0404 0.3170 -0.0196 0.064 Uiso 1 1 calc R . . 
C36 C -0.0860(3) 0.1600(5) 0.01070(12) 0.0564(11) Uani 1 1 d . . . 
H36A H -0.1438 0.1339 -0.0060 0.068 Uiso 1 1 calc R . . 
C37 C -0.0629(3) 0.0887(5) 0.04353(12) 0.0584(11) Uani 1 1 d . . . 
H37A H -0.1059 0.0161 0.0492 0.070 Uiso 1 1 calc R . . 
C38 C 0.0244(3) 0.1249(4) 0.06814(10) 0.0438(8) Uani 1 1 d . . . 
H38A H 0.0409 0.0746 0.0899 0.053 Uiso 1 1 calc R . . 
C39 C 0.3708(3) 0.1737(4) 0.18747(9) 0.0390(7) Uani 1 1 d . . . 
C40 C 0.4354(3) 0.2397(6) 0.21615(12) 0.0629(12) Uani 1 1 d . . . 
H40A H 0.4141 0.3228 0.2267 0.075 Uiso 1 1 calc R . . 
C41 C 0.5313(4) 0.1832(7) 0.22917(15) 0.0833(17) Uani 1 1 d . . . 
H41A H 0.5741 0.2290 0.2483 0.100 Uiso 1 1 calc R . . 
C42 C 0.5631(4) 0.0618(7) 0.21422(17) 0.0815(18) Uani 1 1 d . . . 
H42A H 0.6277 0.0245 0.2232 0.098 Uiso 1 1 calc R . . 
C43 C 0.5012(4) -0.0068(6) 0.18602(15) 0.0704(14) Uani 1 1 d . . . 
H43A H 0.5238 -0.0902 0.1759 0.084 Uiso 1 1 calc R . . 
C44 C 0.4039(3) 0.0482(4) 0.17242(11) 0.0490(9) Uani 1 1 d . . . 
H44A H 0.3616 0.0012 0.1534 0.059 Uiso 1 1 calc R . . 
C45 C 0.2402(3) 0.4285(4) 0.18320(9) 0.0407(8) Uani 1 1 d . . . 
C46 C 0.1583(4) 0.4835(5) 0.19658(14) 0.0653(12) Uani 1 1 d . . . 
H46A H 0.1074 0.4216 0.2014 0.078 Uiso 1 1 calc R . . 
C47 C 0.1528(5) 0.6329(6) 0.20272(18) 0.0904(19) Uani 1 1 d . . . 
H47A H 0.0977 0.6707 0.2116 0.108 Uiso 1 1 calc R . . 
C48 C 0.2272(5) 0.7232(5) 0.19587(16) 0.0846(17) Uani 1 1 d . . . 
H48A H 0.2229 0.8225 0.2002 0.101 Uiso 1 1 calc R . . 
C49 C 0.3081(4) 0.6698(5) 0.18269(13) 0.0679(14) Uani 1 1 d . . . 
H49A H 0.3587 0.7328 0.1780 0.082 Uiso 1 1 calc R . . 
C50 C 0.3157(3) 0.5215(4) 0.17610(10) 0.0496(9) Uani 1 1 d . . . 
H50A H 0.3709 0.4853 0.1670 0.060 Uiso 1 1 calc R . . 
C51 C 0.1634(3) 0.1403(4) 0.19603(9) 0.0371(7) Uani 1 1 d . . . 
C52 C 0.1947(4) 0.1188(5) 0.23342(10) 0.0565(11) Uani 1 1 d . . . 
H52A H 0.2565 0.1567 0.2453 0.068 Uiso 1 1 calc R . . 
C53 C 0.1335(4) 0.0411(6) 0.25271(11) 0.0671(13) Uani 1 1 d . . . 
H53A H 0.1532 0.0296 0.2777 0.081 Uiso 1 1 calc R . . 
C54 C 0.0435(4) -0.0193(5) 0.23491(12) 0.0634(12) Uani 1 1 d . . . 
H54A H 0.0039 -0.0743 0.2478 0.076 Uiso 1 1 calc R . . 
C55 C 0.0122(3) 0.0014(5) 0.19843(12) 0.0581(11) Uani 1 1 d . . . 
H55A H -0.0497 -0.0368 0.1867 0.070 Uiso 1 1 calc R . . 
C56 C 0.0726(3) 0.0792(4) 0.17885(10) 0.0448(8) Uani 1 1 d . . . 
H56A H 0.0518 0.0903 0.1539 0.054 Uiso 1 1 calc R . . 
C1 C 0.7577(3) 0.5692(4) 0.07563(10) 0.0430(8) Uani 1 1 d . . . 
C2 C 0.6629(3) 0.4906(4) 0.08361(11) 0.0458(8) Uani 1 1 d . . . 
H2A H 0.6868 0.4018 0.0970 0.055 Uiso 1 1 calc R . . 
C11 C 0.8029(4) 0.4863(5) 0.04731(11) 0.0587(11) Uani 1 1 d . . . 
H11A H 0.8575 0.5436 0.0406 0.070 Uiso 1 1 calc R . . 
H11B H 0.8322 0.3960 0.0579 0.070 Uiso 1 1 calc R . . 
C12 C 0.7254(4) 0.4521(6) 0.01352(12) 0.0722(14) Uani 1 1 d . . . 
H12A H 0.7582 0.3990 -0.0035 0.087 Uiso 1 1 calc R . . 
H12B H 0.6986 0.5421 0.0020 0.087 Uiso 1 1 calc R . . 
C13 C 0.6386(4) 0.3618(6) 0.02277(13) 0.0772(16) Uani 1 1 d . . . 
H13A H 0.6648 0.2697 0.0332 0.093 Uiso 1 1 calc R . . 
H13B H 0.5894 0.3416 0.0008 0.093 Uiso 1 1 calc R . . 
C14 C 0.5866(4) 0.4428(5) 0.04955(13) 0.0641(12) Uani 1 1 d . . . 
H14A H 0.5353 0.3803 0.0568 0.077 Uiso 1 1 calc R . . 
H14B H 0.5524 0.5280 0.0378 0.077 Uiso 1 1 calc R . . 
C15 C 0.8652(4) 0.3193(6) 0.15762(16) 0.0829(16) Uani 1 1 d . . . 
H15A H 0.9156 0.3784 0.1494 0.124 Uiso 1 1 calc R . . 
H15B H 0.8507 0.2355 0.1422 0.124 Uiso 1 1 calc R . . 
H15C H 0.8904 0.2884 0.1821 0.124 Uiso 1 1 calc R . . 
C16 C 0.6918(4) 0.3235(6) 0.16834(15) 0.0805(16) Uani 1 1 d . . . 
H16A H 0.6330 0.3849 0.1669 0.121 Uiso 1 1 calc R . . 
H16B H 0.7141 0.2926 0.1930 0.121 Uiso 1 1 calc R . . 
H16C H 0.6745 0.2398 0.1531 0.121 Uiso 1 1 calc R . . 
B1 B 0.7396(4) 0.8569(5) 0.14103(14) 0.0530(11) Uani 1 1 d . . . 
H1 H 0.7411 0.9504 0.1595 0.064 Uiso 1 1 calc R . . 
B2 B 0.7194(4) 0.8823(5) 0.09349(14) 0.0518(11) Uani 1 1 d . . . 
H2 H 0.7088 0.9921 0.0817 0.062 Uiso 1 1 calc R . . 
B3 B 0.8389(4) 0.8216(5) 0.11678(13) 0.0501(11) Uani 1 1 d . . . 
H3 H 0.9072 0.8906 0.1196 0.060 Uiso 1 1 calc R . . 
B4 B 0.8219(3) 0.7047(5) 0.15224(12) 0.0446(9) Uani 1 1 d . . . 
H4 H 0.8815 0.7028 0.1768 0.054 Uiso 1 1 calc R . . 
B5 B 0.6861(3) 0.6885(5) 0.15168(13) 0.0458(10) Uani 1 1 d . . . 
H5 H 0.6524 0.6761 0.1761 0.055 Uiso 1 1 calc R . . 
B6 B 0.6258(4) 0.7930(5) 0.11370(14) 0.0525(11) Uani 1 1 d . . . 
H6 H 0.5517 0.8457 0.1135 0.063 Uiso 1 1 calc R . . 
B7 B 0.7849(4) 0.7475(5) 0.07391(12) 0.0479(10) Uani 1 1 d . . . 
H7 H 0.8142 0.7750 0.0492 0.057 Uiso 1 1 calc R . . 
B8 B 0.8461(3) 0.6241(5) 0.11109(12) 0.0428(9) Uani 1 1 d . . . 
H8 H 0.9143 0.5574 0.1107 0.051 Uiso 1 1 calc R . . 
B9 B 0.7585(3) 0.5444(5) 0.14177(11) 0.0418(9) Uani 1 1 d . . . 
B10 B 0.6176(3) 0.5967(5) 0.11164(13) 0.0448(9) Uani 1 1 d . . . 
H10 H 0.5467 0.5349 0.1110 0.054 Uiso 1 1 calc R . . 
B11 B 0.6514(4) 0.7336(5) 0.07184(13) 0.0504(11) Uani 1 1 d . . . 
H11 H 0.5938 0.7421 0.0468 0.060 Uiso 1 1 calc R . . 
 
loop_ 
 _atom_site_aniso_label 
 _atom_site_aniso_U_11 
 _atom_site_aniso_U_22 
 _atom_site_aniso_U_33 
 _atom_site_aniso_U_23 
 _atom_site_aniso_U_13 
 _atom_site_aniso_U_12 
N1 0.060(2) 0.0408(18) 0.060(2) 0.0142(15) 0.0107(16) 0.0046(16) 
N2 0.0400(15) 0.0294(14) 0.0318(13) 0.0022(11) 0.0056(11) -0.0025(11) 
P1 0.0287(4) 0.0253(4) 0.0308(4) 0.0019(3) 0.0048(3) 0.0007(3) 
P2 0.0389(4) 0.0258(4) 0.0309(4) -0.0006(3) 0.0045(3) 0.0023(3) 
C21 0.0348(17) 0.0290(15) 0.0338(15) 0.0028(13) 0.0013(12) 0.0001(13) 
C22 0.0359(18) 0.0365(18) 0.054(2) 0.0029(16) 0.0035(15) 0.0058(15) 
C23 0.063(3) 0.035(2) 0.064(3) -0.0016(18) 0.001(2) 0.0118(19) 
C24 0.082(3) 0.0266(18) 0.063(3) 0.0073(18) -0.005(2) -0.001(2) 
C25 0.069(3) 0.043(2) 0.058(2) 0.0070(19) 0.006(2) -0.022(2) 
C26 0.0402(19) 0.0406(19) 0.049(2) 0.0017(16) 0.0074(15) -0.0063(15) 
C27 0.0407(18) 0.0302(16) 0.0381(16) 0.0062(13) 0.0142(14) 0.0026(13) 
C28 0.042(2) 0.047(2) 0.048(2) 0.0093(16) 0.0113(15) 0.0107(16) 
C29 0.044(2) 0.061(3) 0.069(3) 0.020(2) 0.0203(19) 0.020(2) 
C30 0.065(3) 0.058(3) 0.080(3) 0.009(2) 0.042(2) 0.023(2) 
C31 0.073(3) 0.060(3) 0.065(3) -0.013(2) 0.033(2) 0.007(2) 
C32 0.049(2) 0.054(2) 0.049(2) -0.0066(18) 0.0152(17) 0.0016(18) 
C33 0.0337(16) 0.0289(15) 0.0351(15) -0.0021(13) 0.0035(12) -0.0007(13) 
C34 0.0380(19) 0.044(2) 0.0424(18) 0.0065(15) -0.0004(14) -0.0049(15) 
C35 0.057(2) 0.052(2) 0.0426(19) 0.0038(18) -0.0091(17) 0.0001(19) 
C36 0.048(2) 0.054(2) 0.059(2) -0.010(2) -0.0113(19) -0.0066(19) 
C37 0.052(2) 0.055(3) 0.066(3) -0.002(2) 0.003(2) -0.024(2) 
C38 0.049(2) 0.0395(19) 0.0411(18) 0.0046(15) 0.0049(15) -0.0091(16) 
C39 0.0373(18) 0.0407(19) 0.0375(17) 0.0076(14) 0.0033(14) 0.0054(15) 
C40 0.060(3) 0.067(3) 0.055(2) -0.004(2) -0.009(2) 0.006(2) 
C41 0.055(3) 0.102(5) 0.080(3) 0.017(3) -0.021(3) -0.002(3) 
C42 0.043(3) 0.097(4) 0.100(4) 0.054(4) 0.002(3) 0.014(3) 
C43 0.067(3) 0.063(3) 0.089(4) 0.035(3) 0.034(3) 0.028(2) 
C44 0.050(2) 0.045(2) 0.054(2) 0.0093(17) 0.0119(17) 0.0099(17) 
C45 0.052(2) 0.0270(16) 0.0392(17) -0.0028(13) -0.0003(15) 0.0048(15) 
C46 0.073(3) 0.040(2) 0.088(3) -0.008(2) 0.029(3) 0.009(2) 
C47 0.107(5) 0.049(3) 0.122(5) -0.019(3) 0.039(4) 0.022(3) 
C48 0.119(5) 0.035(2) 0.092(4) -0.017(3) 0.001(3) 0.012(3) 
C49 0.093(4) 0.037(2) 0.061(3) 0.004(2) -0.017(3) -0.015(2) 
C50 0.059(2) 0.040(2) 0.045(2) -0.0032(16) -0.0037(17) -0.0040(18) 
C51 0.047(2) 0.0319(17) 0.0338(16) 0.0013(13) 0.0123(14) 0.0002(14) 
C52 0.079(3) 0.058(3) 0.0319(18) -0.0034(17) 0.0089(18) -0.009(2) 
C53 0.100(4) 0.071(3) 0.036(2) 0.004(2) 0.024(2) -0.006(3) 
C54 0.086(3) 0.056(3) 0.059(3) 0.005(2) 0.040(2) -0.008(2) 
C55 0.057(3) 0.059(3) 0.062(3) 0.001(2) 0.020(2) -0.011(2) 
C56 0.045(2) 0.051(2) 0.0394(18) 0.0058(16) 0.0087(15) -0.0021(17) 
C1 0.042(2) 0.043(2) 0.0451(19) 0.0031(16) 0.0104(15) 0.0023(16) 
C2 0.047(2) 0.0364(19) 0.053(2) 0.0053(16) 0.0065(16) -0.0001(16) 
C11 0.066(3) 0.060(3) 0.052(2) -0.004(2) 0.017(2) 0.006(2) 
C12 0.096(4) 0.071(3) 0.047(2) -0.007(2) 0.008(2) 0.008(3) 
C13 0.101(4) 0.058(3) 0.061(3) -0.013(2) -0.016(3) -0.003(3) 
C14 0.060(3) 0.050(2) 0.074(3) -0.004(2) -0.010(2) -0.009(2) 
C15 0.084(4) 0.059(3) 0.102(4) 0.022(3) 0.008(3) 0.027(3) 
C16 0.090(4) 0.064(3) 0.090(4) 0.030(3) 0.023(3) -0.017(3) 
B1 0.061(3) 0.037(2) 0.062(3) -0.004(2) 0.014(2) -0.001(2) 
B2 0.056(3) 0.034(2) 0.065(3) 0.007(2) 0.009(2) 0.002(2) 
B3 0.052(3) 0.043(2) 0.055(3) 0.006(2) 0.011(2) -0.009(2) 
B4 0.049(2) 0.036(2) 0.048(2) -0.0019(18) 0.0073(18) -0.0021(18) 
B5 0.048(2) 0.038(2) 0.055(2) 0.0036(19) 0.0184(19) 0.0041(18) 
B6 0.050(3) 0.035(2) 0.072(3) 0.004(2) 0.009(2) 0.0105(19) 
B7 0.054(3) 0.041(2) 0.050(2) 0.0120(19) 0.0117(19) -0.0026(19) 
B8 0.035(2) 0.045(2) 0.049(2) 0.0041(18) 0.0115(17) 0.0034(17) 
B9 0.038(2) 0.043(2) 0.044(2) 0.0036(18) 0.0094(17) 0.0028(17) 
B10 0.036(2) 0.041(2) 0.059(3) 0.0036(19) 0.0123(18) 0.0001(17) 
B11 0.056(3) 0.033(2) 0.059(3) 0.0107(19) 0.001(2) 0.0024(19) 
 
_geom_special_details 
; 
 All esds (except the esd in the dihedral angle between two l.s. planes) 
 are estimated using the full covariance matrix.  The cell esds are taken 
 into account individually in the estimation of esds in distances, angles 
 and torsion angles; correlations between esds in cell parameters are only 
 used when they are defined by crystal symmetry.  An approximate (isotropic) 
 treatment of cell esds is used for estimating esds involving l.s. planes. 
; 
 
loop_ 
 _geom_bond_atom_site_label_1 
 _geom_bond_atom_site_label_2 
 _geom_bond_distance 
 _geom_bond_site_symmetry_2 
 _geom_bond_publ_flag 
N1 B9 1.405(5) . ? 
N1 C16 1.445(6) . ? 
N1 C15 1.451(6) . ? 
N2 P2 1.579(3) . ? 
N2 P1 1.595(3) . ? 
P1 C33 1.794(3) . ? 
P1 C21 1.800(3) . ? 
P1 C27 1.809(3) . ? 
P2 C51 1.797(3) . ? 
P2 C45 1.802(3) . ? 
P2 C39 1.806(3) . ? 
C21 C26 1.389(5) . ? 
C21 C22 1.390(5) . ? 
C22 C23 1.381(5) . ? 
C23 C24 1.389(6) . ? 
C24 C25 1.372(6) . ? 
C25 C26 1.391(5) . ? 
C27 C32 1.384(5) . ? 
C27 C28 1.400(5) . ? 
C28 C29 1.380(5) . ? 
C29 C30 1.380(7) . ? 
C30 C31 1.376(7) . ? 
C31 C32 1.385(5) . ? 
C33 C38 1.385(5) . ? 
C33 C34 1.391(5) . ? 
C34 C35 1.389(5) . ? 
C35 C36 1.366(6) . ? 
C36 C37 1.378(6) . ? 
C37 C38 1.386(5) . ? 
C39 C40 1.387(5) . ? 
C39 C44 1.391(5) . ? 
C40 C41 1.384(6) . ? 
C41 C42 1.352(8) . ? 
C42 C43 1.369(8) . ? 
C43 C44 1.399(6) . ? 
C45 C46 1.381(6) . ? 
C45 C50 1.384(5) . ? 
C46 C47 1.396(6) . ? 
C47 C48 1.355(8) . ? 
C48 C49 1.361(8) . ? 
C49 C50 1.391(6) . ? 
C51 C56 1.382(5) . ? 
C51 C52 1.401(5) . ? 
C52 C53 1.386(6) . ? 
C53 C54 1.377(7) . ? 
C54 C55 1.368(6) . ? 
C55 C56 1.385(5) . ? 
C1 C11 1.521(5) . ? 
C1 C2 1.535(5) . ? 
C1 B7 1.682(6) . ? 
C1 B8 1.683(6) . ? 
C1 B11 2.059(6) . ? 
C2 C14 1.542(6) . ? 
C2 B10 1.631(6) . ? 
C11 C12 1.513(6) . ? 
C12 C13 1.517(7) . ? 
C13 C14 1.518(7) . ? 
B1 B6 1.768(7) . ? 
B1 B2 1.769(7) . ? 
B1 B3 1.772(7) . ? 
B1 B4 1.780(7) . ? 
B1 B5 1.781(6) . ? 
B2 B11 1.753(7) . ? 
B2 B7 1.754(7) . ? 
B2 B3 1.760(7) . ? 
B2 B6 1.779(7) . ? 
B3 B4 1.756(6) . ? 
B3 B7 1.771(7) . ? 
B3 B8 1.831(7) . ? 
B4 B9 1.708(6) . ? 
B4 B8 1.795(6) . ? 
B4 B5 1.817(6) . ? 
B5 B9 1.721(6) . ? 
B5 B6 1.781(7) . ? 
B5 B10 1.814(7) . ? 
B6 B11 1.755(7) . ? 
B6 B10 1.807(6) . ? 
B7 B11 1.774(7) . ? 
B7 B8 1.864(6) . ? 
B8 B9 1.932(6) . ? 
B9 B10 2.063(6) . ? 
B10 B11 2.066(6) . ? 
 
loop_ 
 _geom_angle_atom_site_label_1 
 _geom_angle_atom_site_label_2 
 _geom_angle_atom_site_label_3 
 _geom_angle 
 _geom_angle_site_symmetry_1 
 _geom_angle_site_symmetry_3 
 _geom_angle_publ_flag 
B9 N1 C16 122.4(4) . . ? 
B9 N1 C15 123.7(4) . . ? 
C16 N1 C15 113.6(4) . . ? 
P2 N2 P1 141.08(19) . . ? 
N2 P1 C33 109.22(15) . . ? 
N2 P1 C21 115.38(15) . . ? 
C33 P1 C21 106.27(15) . . ? 
N2 P1 C27 109.63(15) . . ? 
C33 P1 C27 106.19(16) . . ? 
C21 P1 C27 109.71(16) . . ? 
N2 P2 C51 108.25(15) . . ? 
N2 P2 C45 114.11(15) . . ? 
C51 P2 C45 107.97(17) . . ? 
N2 P2 C39 113.53(16) . . ? 
C51 P2 C39 105.22(16) . . ? 
C45 P2 C39 107.26(17) . . ? 
C26 C21 C22 119.4(3) . . ? 
C26 C21 P1 122.7(3) . . ? 
C22 C21 P1 117.9(3) . . ? 
C23 C22 C21 120.7(4) . . ? 
C22 C23 C24 119.7(4) . . ? 
C25 C24 C23 120.0(4) . . ? 
C24 C25 C26 120.6(4) . . ? 
C21 C26 C25 119.6(4) . . ? 
C32 C27 C28 119.7(3) . . ? 
C32 C27 P1 121.9(3) . . ? 
C28 C27 P1 118.4(3) . . ? 
C29 C28 C27 120.0(4) . . ? 
C28 C29 C30 119.9(4) . . ? 
C31 C30 C29 120.2(4) . . ? 
C30 C31 C32 120.7(4) . . ? 
C27 C32 C31 119.4(4) . . ? 
C38 C33 C34 119.0(3) . . ? 
C38 C33 P1 121.5(3) . . ? 
C34 C33 P1 119.3(3) . . ? 
C35 C34 C33 120.2(3) . . ? 
C36 C35 C34 120.2(4) . . ? 
C35 C36 C37 120.2(4) . . ? 
C36 C37 C38 120.1(4) . . ? 
C33 C38 C37 120.3(3) . . ? 
C40 C39 C44 118.6(4) . . ? 
C40 C39 P2 122.2(3) . . ? 
C44 C39 P2 119.1(3) . . ? 
C41 C40 C39 120.7(5) . . ? 
C42 C41 C40 120.3(5) . . ? 
C41 C42 C43 120.6(5) . . ? 
C42 C43 C44 120.1(5) . . ? 
C39 C44 C43 119.7(4) . . ? 
C46 C45 C50 119.9(4) . . ? 
C46 C45 P2 120.2(3) . . ? 
C50 C45 P2 119.6(3) . . ? 
C45 C46 C47 119.3(5) . . ? 
C48 C47 C46 120.5(5) . . ? 
C47 C48 C49 120.5(5) . . ? 
C48 C49 C50 120.4(5) . . ? 
C45 C50 C49 119.4(4) . . ? 
C56 C51 C52 118.8(3) . . ? 
C56 C51 P2 121.0(3) . . ? 
C52 C51 P2 120.2(3) . . ? 
C53 C52 C51 120.1(4) . . ? 
C54 C53 C52 120.0(4) . . ? 
C55 C54 C53 120.4(4) . . ? 
C54 C55 C56 120.2(4) . . ? 
C51 C56 C55 120.6(4) . . ? 
C11 C1 C2 110.5(3) . . ? 
C11 C1 B7 110.1(3) . . ? 
C2 C1 B7 131.1(3) . . ? 
C11 C1 B8 113.0(3) . . ? 
C2 C1 B8 118.0(3) . . ? 
B7 C1 B8 67.3(3) . . ? 
C11 C1 B11 132.6(3) . . ? 
C2 C1 B11 77.0(2) . . ? 
B7 C1 B11 55.5(2) . . ? 
B8 C1 B11 102.0(3) . . ? 
C1 C2 C14 114.5(3) . . ? 
C1 C2 B10 105.2(3) . . ? 
C14 C2 B10 116.0(3) . . ? 
C12 C11 C1 113.0(4) . . ? 
C11 C12 C13 110.8(4) . . ? 
C12 C13 C14 110.3(4) . . ? 
C13 C14 C2 112.0(4) . . ? 
B6 B1 B2 60.4(3) . . ? 
B6 B1 B3 106.6(3) . . ? 
B2 B1 B3 59.6(3) . . ? 
B6 B1 B4 107.6(3) . . ? 
B2 B1 B4 108.3(3) . . ? 
B3 B1 B4 59.3(3) . . ? 
B6 B1 B5 60.2(3) . . ? 
B2 B1 B5 110.4(3) . . ? 
B3 B1 B5 109.0(3) . . ? 
B4 B1 B5 61.4(3) . . ? 
B11 B2 B7 60.8(3) . . ? 
B11 B2 B3 109.0(3) . . ? 
B7 B2 B3 60.5(3) . . ? 
B11 B2 B1 109.4(3) . . ? 
B7 B2 B1 109.6(3) . . ? 
B3 B2 B1 60.3(3) . . ? 
B11 B2 B6 59.6(3) . . ? 
B7 B2 B6 107.3(3) . . ? 
B3 B2 B6 106.6(3) . . ? 
B1 B2 B6 59.8(3) . . ? 
B4 B3 B2 109.7(3) . . ? 
B4 B3 B7 111.4(3) . . ? 
B2 B3 B7 59.6(3) . . ? 
B4 B3 B1 60.6(3) . . ? 
B2 B3 B1 60.1(3) . . ? 
B7 B3 B1 108.7(3) . . ? 
B4 B3 B8 60.0(2) . . ? 
B2 B3 B8 108.6(3) . . ? 
B7 B3 B8 62.3(3) . . ? 
B1 B3 B8 107.6(3) . . ? 
B9 B4 B3 118.8(3) . . ? 
B9 B4 B1 111.4(3) . . ? 
B3 B4 B1 60.1(3) . . ? 
B9 B4 B8 66.9(3) . . ? 
B3 B4 B8 62.1(3) . . ? 
B1 B4 B8 108.8(3) . . ? 
B9 B4 B5 58.3(2) . . ? 
B3 B4 B5 108.1(3) . . ? 
B1 B4 B5 59.3(3) . . ? 
B8 B4 B5 107.2(3) . . ? 
B9 B5 B6 115.5(3) . . ? 
B9 B5 B1 110.8(3) . . ? 
B6 B5 B1 59.5(3) . . ? 
B9 B5 B10 71.4(3) . . ? 
B6 B5 B10 60.3(3) . . ? 
B1 B5 B10 112.3(3) . . ? 
B9 B5 B4 57.7(2) . . ? 
B6 B5 B4 105.4(3) . . ? 
B1 B5 B4 59.3(3) . . ? 
B10 B5 B4 113.3(3) . . ? 
B11 B6 B1 109.4(4) . . ? 
B11 B6 B2 59.5(3) . . ? 
B1 B6 B2 59.8(3) . . ? 
B11 B6 B5 114.5(3) . . ? 
B1 B6 B5 60.2(3) . . ? 
B2 B6 B5 109.9(3) . . ? 
B11 B6 B10 70.9(3) . . ? 
B1 B6 B10 113.3(3) . . ? 
B2 B6 B10 119.0(3) . . ? 
B5 B6 B10 60.7(3) . . ? 
C1 B7 B2 122.9(3) . . ? 
C1 B7 B3 113.2(3) . . ? 
B2 B7 B3 59.9(3) . . ? 
C1 B7 B11 73.1(3) . . ? 
B2 B7 B11 59.6(3) . . ? 
B3 B7 B11 107.6(3) . . ? 
C1 B7 B8 56.4(2) . . ? 
B2 B7 B8 107.4(3) . . ? 
B3 B7 B8 60.4(2) . . ? 
B11 B7 B8 106.6(3) . . ? 
C1 B8 B4 126.3(3) . . ? 
C1 B8 B3 110.1(3) . . ? 
B4 B8 B3 57.9(2) . . ? 
C1 B8 B7 56.3(2) . . ? 
B4 B8 B7 105.6(3) . . ? 
B3 B8 B7 57.3(2) . . ? 
C1 B8 B9 86.8(3) . . ? 
B4 B8 B9 54.4(2) . . ? 
B3 B8 B9 104.8(3) . . ? 
B7 B8 B9 116.5(3) . . ? 
N1 B9 B4 132.9(4) . . ? 
N1 B9 B5 131.7(4) . . ? 
B4 B9 B5 64.0(3) . . ? 
N1 B9 B8 122.0(3) . . ? 
B4 B9 B8 58.7(2) . . ? 
B5 B9 B8 105.3(3) . . ? 
N1 B9 B10 118.1(3) . . ? 
B4 B9 B10 106.7(3) . . ? 
B5 B9 B10 56.4(2) . . ? 
B8 B9 B10 100.2(3) . . ? 
C2 B10 B6 126.7(3) . . ? 
C2 B10 B5 128.4(3) . . ? 
B6 B10 B5 58.9(3) . . ? 
C2 B10 B9 78.7(2) . . ? 
B6 B10 B9 99.6(3) . . ? 
B5 B10 B9 52.2(2) . . ? 
C2 B10 B11 75.0(3) . . ? 
B6 B10 B11 53.4(2) . . ? 
B5 B10 B11 99.8(3) . . ? 
B9 B10 B11 103.7(3) . . ? 
B2 B11 B6 60.9(3) . . ? 
B2 B11 B7 59.6(3) . . ? 
B6 B11 B7 107.5(3) . . ? 
B2 B11 C1 104.4(3) . . ? 
B6 B11 C1 114.4(3) . . ? 
B7 B11 C1 51.4(2) . . ? 
B2 B11 B10 107.7(3) . . ? 
B6 B11 B10 55.7(2) . . ? 
B7 B11 B10 111.4(3) . . ? 
C1 B11 B10 75.2(2) . . ? 
 
_diffrn_measured_fraction_theta_max    0.989 
_diffrn_reflns_theta_full              28.07 
_diffrn_measured_fraction_theta_full   0.989 
_refine_diff_density_max    0.452 
_refine_diff_density_min   -0.433 
_refine_diff_density_rms    0.063 
#===END


data_[4][PPN]
 
_audit_creation_method            SHELXL-97 
_chemical_name_systematic 
; 
 ? 
; 
_chemical_name_common             ? 
_chemical_melting_point           ? 
_chemical_formula_moiety          ? 
_chemical_formula_sum 
 'C46 H59 B11 N2 P2' 
_chemical_formula_weight          820.80 
 
loop_ 
 _atom_type_symbol 
 _atom_type_description 
 _atom_type_scat_dispersion_real 
 _atom_type_scat_dispersion_imag 
 _atom_type_scat_source 
 'C'  'C'   0.0033   0.0016 
 'International Tables Vol C Tables 4.2.6.8 and 6.1.1.4' 
 'H'  'H'   0.0000   0.0000 
 'International Tables Vol C Tables 4.2.6.8 and 6.1.1.4' 
 'B'  'B'   0.0013   0.0007 
 'International Tables Vol C Tables 4.2.6.8 and 6.1.1.4' 
 'N'  'N'   0.0061   0.0033 
 'International Tables Vol C Tables 4.2.6.8 and 6.1.1.4' 
 'P'  'P'   0.1023   0.0942 
 'International Tables Vol C Tables 4.2.6.8 and 6.1.1.4' 
 
_symmetry_cell_setting            Monoclinic 
_symmetry_space_group_name_H-M    P2(1)/c 
 
loop_ 
 _symmetry_equiv_pos_as_xyz 
 'x, y, z' 
 '-x, y+1/2, -z+1/2' 
 '-x, -y, -z' 
 'x, -y-1/2, z-1/2' 
 
_cell_length_a                    16.747(3) 
_cell_length_b                    10.655(2) 
_cell_length_c                    26.720(5) 
_cell_angle_alpha                 90.00 
_cell_angle_beta                  99.830(3) 
_cell_angle_gamma                 90.00 
_cell_volume                      4698.0(15) 
_cell_formula_units_Z             4 
_cell_measurement_temperature     296(2) 
_cell_measurement_reflns_used     112 
_cell_measurement_theta_min       15 
_cell_measurement_theta_max       15 
 
_exptl_crystal_description        block 
_exptl_crystal_colour             colourless 
_exptl_crystal_size_max           0.50 
_exptl_crystal_size_mid           0.40 
_exptl_crystal_size_min           0.20 
_exptl_crystal_density_meas       ? 
_exptl_crystal_density_diffrn     1.160 
_exptl_crystal_density_method     'not measured' 
_exptl_crystal_F_000              1736 
_exptl_absorpt_coefficient_mu     0.128 
_exptl_absorpt_correction_type    multi-scan 
_exptl_absorpt_correction_T_min   0.6257  
_exptl_absorpt_correction_T_max   0.7456
_exptl_absorpt_process_details    ? 
 
_exptl_special_details 
; 
 ? 
; 
 
_diffrn_ambient_temperature       296(2) 
_diffrn_radiation_wavelength      0.71073 
_diffrn_radiation_type            MoK\a 
_diffrn_radiation_source          'fine-focus sealed tube' 
_diffrn_radiation_monochromator   graphite 
_diffrn_measurement_device_type   'BRUKER KAPPA APEXII DUO DIFFRACTOMETER' 
_diffrn_measurement_method        'PHI & OMEGA SCAN' 
_diffrn_detector_area_resol_mean  ? 
_diffrn_reflns_number             42472 
_diffrn_reflns_av_R_equivalents   0.2000 
_diffrn_reflns_av_sigmaI/netI     0.1933 
_diffrn_reflns_limit_h_min        -20 
_diffrn_reflns_limit_h_max        20 
_diffrn_reflns_limit_k_min        -12 
_diffrn_reflns_limit_k_max        12 
_diffrn_reflns_limit_l_min        -32 
_diffrn_reflns_limit_l_max        32 
_diffrn_reflns_theta_min          1.55 
_diffrn_reflns_theta_max          25.25 
_reflns_number_total              8499 
_reflns_number_gt                 3303 
_reflns_threshold_expression      >2sigma(I) 
 
_computing_data_collection        'BRUKER KAPPA APEXII DUO DIFFRACTOMETER'  
_computing_cell_refinement        'BRUKER KAPPA APEXII DUO DIFFRACTOMETER'  
_computing_data_reduction         'BRUKER KAPPA APEXII DUO DIFFRACTOMETER'  
_computing_structure_solution     'SHELXS-97 (Sheldrick, 2008)' 
_computing_structure_refinement   'SHELXL-97 (Sheldrick, 2008)' 
_computing_molecular_graphics     'SIEMENS SHELXTL'
_computing_publication_material   'SIEMENS SHELXTL' 
 
_refine_special_details 
; 
 Refinement of F^2^ against ALL reflections.  The weighted R-factor wR and 
 goodness of fit S are based on F^2^, conventional R-factors R are based 
 on F, with F set to zero for negative F^2^. The threshold expression of 
 F^2^ > 2sigma(F^2^) is used only for calculating R-factors(gt) etc. and is 
 not relevant to the choice of reflections for refinement.  R-factors based 
 on F^2^ are statistically about twice as large as those based on F, and R- 
 factors based on ALL data will be even larger. 
; 
 
_refine_ls_structure_factor_coef  Fsqd  
_refine_ls_matrix_type            full 
_refine_ls_weighting_scheme       calc  
_refine_ls_weighting_details 
 'calc w=1/[\s^2^(Fo^2^)+(0.0579P)^2^+0.0000P] where P=(Fo^2^+2Fc^2^)/3' 
_atom_sites_solution_primary      direct 
_atom_sites_solution_secondary    difmap 
_atom_sites_solution_hydrogens    geom 
_refine_ls_hydrogen_treatment     riding
_refine_ls_extinction_method      none 
_refine_ls_extinction_coef        ? 
_refine_ls_number_reflns          8499 
_refine_ls_number_parameters      550 
_refine_ls_number_restraints      0 
_refine_ls_R_factor_all           0.2157 
_refine_ls_R_factor_gt            0.0676 
_refine_ls_wR_factor_ref          0.1792 
_refine_ls_wR_factor_gt           0.1191 
_refine_ls_goodness_of_fit_ref    0.989 
_refine_ls_restrained_S_all       0.989 
_refine_ls_shift/su_max           0.000 
_refine_ls_shift/su_mean          0.000 
 
loop_ 
 _atom_site_label 
 _atom_site_type_symbol 
 _atom_site_fract_x 
 _atom_site_fract_y 
 _atom_site_fract_z 
 _atom_site_U_iso_or_equiv 
 _atom_site_adp_type 
 _atom_site_occupancy 
 _atom_site_symmetry_multiplicity 
 _atom_site_calc_flag 
 _atom_site_refinement_flags 
 _atom_site_disorder_assembly 
 _atom_site_disorder_group 
N2 N 0.5654(2) 0.1827(4) 0.40617(16) 0.0533(12) Uani 1 1 d . . . 
N1 N 0.1756(2) 1.0339(3) 0.33970(13) 0.0388(10) Uani 1 1 d . . . 
P1 P 0.18153(7) 0.94443(11) 0.38726(5) 0.0370(3) Uani 1 1 d . . . 
P2 P 0.14091(7) 1.16872(11) 0.32298(5) 0.0375(3) Uani 1 1 d . . . 
C1 C 0.6550(3) 0.4514(4) 0.37333(19) 0.0467(13) Uani 1 1 d . . . 
C2 C 0.6035(3) 0.3727(4) 0.33131(19) 0.0488(14) Uani 1 1 d . . . 
H2A H 0.5563 0.3425 0.3450 0.059 Uiso 1 1 calc R . . 
C11 C 0.6129(3) 0.5749(5) 0.3799(2) 0.0679(17) Uani 1 1 d . . . 
H11A H 0.6488 0.6275 0.4034 0.082 Uiso 1 1 calc R . . 
H11B H 0.5648 0.5588 0.3946 0.082 Uiso 1 1 calc R . . 
C12 C 0.5884(4) 0.6458(5) 0.3294(3) 0.085(2) Uani 1 1 d . . . 
H12A H 0.5609 0.7231 0.3355 0.102 Uiso 1 1 calc R . . 
H12B H 0.6365 0.6673 0.3156 0.102 Uiso 1 1 calc R . . 
C13 C 0.5336(4) 0.5669(6) 0.2921(3) 0.088(2) Uani 1 1 d . . . 
H13A H 0.5196 0.6130 0.2605 0.106 Uiso 1 1 calc R . . 
H13B H 0.4839 0.5511 0.3051 0.106 Uiso 1 1 calc R . . 
C14 C 0.5709(3) 0.4435(5) 0.2815(2) 0.0652(16) Uani 1 1 d . . . 
H14A H 0.6150 0.4582 0.2629 0.078 Uiso 1 1 calc R . . 
H14B H 0.5306 0.3922 0.2604 0.078 Uiso 1 1 calc R . . 
C15 C 0.5366(3) 0.2139(5) 0.4533(2) 0.0734(18) Uani 1 1 d . . . 
H15A H 0.5829 0.2349 0.4790 0.088 Uiso 1 1 calc R . . 
H15B H 0.5112 0.1401 0.4650 0.088 Uiso 1 1 calc R . . 
C16 C 0.4766(4) 0.3220(7) 0.4488(3) 0.123(3) Uani 1 1 d . . . 
H16A H 0.4606 0.3367 0.4811 0.184 Uiso 1 1 calc R . . 
H16B H 0.4298 0.3013 0.4241 0.184 Uiso 1 1 calc R . . 
H16C H 0.5016 0.3963 0.4382 0.184 Uiso 1 1 calc R . . 
C17 C 0.5103(3) 0.1057(5) 0.3702(2) 0.0736(18) Uani 1 1 d . . . 
H17A H 0.5265 0.1117 0.3371 0.088 Uiso 1 1 calc R . . 
H17B H 0.4561 0.1405 0.3672 0.088 Uiso 1 1 calc R . . 
C18 C 0.5071(4) -0.0294(6) 0.3841(3) 0.120(3) Uani 1 1 d . . . 
H18A H 0.4697 -0.0726 0.3586 0.180 Uiso 1 1 calc R . . 
H18B H 0.4895 -0.0370 0.4163 0.180 Uiso 1 1 calc R . . 
H18C H 0.5600 -0.0658 0.3862 0.180 Uiso 1 1 calc R . . 
C21 C 0.2152(3) 1.0179(4) 0.44713(18) 0.0424(13) Uani 1 1 d . . . 
C22 C 0.2944(4) 1.0610(5) 0.4589(2) 0.0699(17) Uani 1 1 d . . . 
H22A H 0.3295 1.0500 0.4357 0.084 Uiso 1 1 calc R . . 
C23 C 0.3218(5) 1.1200(6) 0.5046(3) 0.091(2) Uani 1 1 d . . . 
H23A H 0.3751 1.1479 0.5122 0.110 Uiso 1 1 calc R . . 
C24 C 0.2711(5) 1.1372(5) 0.5381(3) 0.089(2) Uani 1 1 d . . . 
H24A H 0.2899 1.1772 0.5688 0.107 Uiso 1 1 calc R . . 
C25 C 0.1937(5) 1.0974(5) 0.5280(2) 0.0738(19) Uani 1 1 d . . . 
H25A H 0.1598 1.1095 0.5517 0.089 Uiso 1 1 calc R . . 
C26 C 0.1639(3) 1.0372(4) 0.4814(2) 0.0582(15) Uani 1 1 d . . . 
H26A H 0.1102 1.0110 0.4741 0.070 Uiso 1 1 calc R . . 
C31 C 0.2538(3) 0.8253(4) 0.38011(18) 0.0355(11) Uani 1 1 d . . . 
C32 C 0.2773(3) 0.8056(4) 0.33336(19) 0.0453(13) Uani 1 1 d . . . 
H32A H 0.2581 0.8583 0.3062 0.054 Uiso 1 1 calc R . . 
C33 C 0.3288(3) 0.7082(5) 0.3269(2) 0.0614(16) Uani 1 1 d . . . 
H33A H 0.3452 0.6968 0.2957 0.074 Uiso 1 1 calc R . . 
C34 C 0.3559(3) 0.6284(5) 0.3662(2) 0.0674(17) Uani 1 1 d . . . 
H34A H 0.3888 0.5608 0.3612 0.081 Uiso 1 1 calc R . . 
C35 C 0.3347(3) 0.6481(5) 0.4130(2) 0.0615(16) Uani 1 1 d . . . 
H35A H 0.3545 0.5954 0.4400 0.074 Uiso 1 1 calc R . . 
C36 C 0.2844(3) 0.7454(4) 0.41988(19) 0.0524(14) Uani 1 1 d . . . 
H36A H 0.2703 0.7582 0.4517 0.063 Uiso 1 1 calc R . . 
C41 C 0.0868(3) 0.8664(4) 0.39096(18) 0.0375(12) Uani 1 1 d . . . 
C42 C 0.0841(3) 0.7714(5) 0.4266(2) 0.0576(15) Uani 1 1 d . . . 
H42A H 0.1306 0.7507 0.4495 0.069 Uiso 1 1 calc R . . 
C43 C 0.0130(4) 0.7086(5) 0.4280(2) 0.0705(18) Uani 1 1 d . . . 
H43A H 0.0120 0.6428 0.4508 0.085 Uiso 1 1 calc R . . 
C44 C -0.0569(4) 0.7427(5) 0.3958(2) 0.0650(17) Uani 1 1 d . . . 
H44A H -0.1054 0.7013 0.3972 0.078 Uiso 1 1 calc R . . 
C45 C -0.0544(3) 0.8377(5) 0.3617(2) 0.0627(15) Uani 1 1 d . . . 
H45A H -0.1017 0.8616 0.3403 0.075 Uiso 1 1 calc R . . 
C46 C 0.0171(3) 0.8983(4) 0.35859(19) 0.0498(14) Uani 1 1 d . . . 
H46A H 0.0181 0.9610 0.3345 0.060 Uiso 1 1 calc R . . 
C51 C 0.1185(3) 1.2627(4) 0.37441(17) 0.0375(12) Uani 1 1 d . . . 
C52 C 0.0505(3) 1.2404(4) 0.39668(19) 0.0460(13) Uani 1 1 d . . . 
H52A H 0.0121 1.1820 0.3821 0.055 Uiso 1 1 calc R . . 
C53 C 0.0391(3) 1.3035(4) 0.4399(2) 0.0534(14) Uani 1 1 d . . . 
H53A H -0.0076 1.2902 0.4536 0.064 Uiso 1 1 calc R . . 
C54 C 0.0968(4) 1.3861(5) 0.4626(2) 0.0617(16) Uani 1 1 d . . . 
H54A H 0.0900 1.4266 0.4924 0.074 Uiso 1 1 calc R . . 
C55 C 0.1636(4) 1.4092(5) 0.4420(2) 0.0708(18) Uani 1 1 d . . . 
H55A H 0.2019 1.4665 0.4574 0.085 Uiso 1 1 calc R . . 
C56 C 0.1754(3) 1.3489(5) 0.3984(2) 0.0556(15) Uani 1 1 d . . . 
H56A H 0.2218 1.3656 0.3847 0.067 Uiso 1 1 calc R . . 
C61 C 0.2137(3) 1.2533(4) 0.29483(17) 0.0340(11) Uani 1 1 d . . . 
C62 C 0.2936(3) 1.2189(5) 0.3023(2) 0.0568(15) Uani 1 1 d . . . 
H62A H 0.3105 1.1478 0.3214 0.068 Uiso 1 1 calc R . . 
C63 C 0.3503(3) 1.2902(5) 0.2813(2) 0.0636(16) Uani 1 1 d . . . 
H63A H 0.4047 1.2675 0.2871 0.076 Uiso 1 1 calc R . . 
C64 C 0.3249(4) 1.3933(5) 0.2525(2) 0.0619(16) Uani 1 1 d . . . 
H64A H 0.3620 1.4399 0.2380 0.074 Uiso 1 1 calc R . . 
C65 C 0.2458(4) 1.4278(5) 0.2449(2) 0.0644(16) Uani 1 1 d . . . 
H65A H 0.2290 1.4983 0.2254 0.077 Uiso 1 1 calc R . . 
C66 C 0.1905(3) 1.3592(4) 0.26584(19) 0.0536(14) Uani 1 1 d . . . 
H66A H 0.1365 1.3842 0.2605 0.064 Uiso 1 1 calc R . . 
C71 C 0.0529(3) 1.1540(4) 0.27433(17) 0.0340(11) Uani 1 1 d . . . 
C72 C -0.0179(3) 1.2197(4) 0.2736(2) 0.0510(14) Uani 1 1 d . . . 
H72A H -0.0225 1.2762 0.2995 0.061 Uiso 1 1 calc R . . 
C73 C -0.0825(3) 1.2020(5) 0.2345(2) 0.0574(15) Uani 1 1 d . . . 
H73A H -0.1303 1.2462 0.2344 0.069 Uiso 1 1 calc R . . 
C74 C -0.0767(3) 1.1201(5) 0.1958(2) 0.0529(14) Uani 1 1 d . . . 
H74A H -0.1207 1.1080 0.1699 0.063 Uiso 1 1 calc R . . 
C75 C -0.0059(3) 1.0562(5) 0.1954(2) 0.0568(15) Uani 1 1 d . . . 
H75A H -0.0012 1.0017 0.1689 0.068 Uiso 1 1 calc R . . 
C76 C 0.0587(3) 1.0729(4) 0.2345(2) 0.0483(14) Uani 1 1 d . . . 
H76A H 0.1067 1.0292 0.2342 0.058 Uiso 1 1 calc R . . 
B1 B 0.8122(4) 0.2174(5) 0.3962(2) 0.0558(18) Uani 1 1 d . . . 
H1 H 0.8651 0.1555 0.4060 0.067 Uiso 1 1 calc R . . 
B2 B 0.8239(4) 0.3655(5) 0.3710(2) 0.0550(18) Uani 1 1 d . . . 
H2 H 0.8839 0.3965 0.3645 0.066 Uiso 1 1 calc R . . 
B3 B 0.7998(3) 0.3499(5) 0.4325(2) 0.0507(16) Uani 1 1 d . . . 
H3 H 0.8426 0.3745 0.4670 0.061 Uiso 1 1 calc R . . 
B4 B 0.7349(3) 0.2206(5) 0.4330(2) 0.0461(16) Uani 1 1 d . . . 
H4 H 0.7386 0.1675 0.4686 0.055 Uiso 1 1 calc R . . 
B5 B 0.7166(3) 0.1517(5) 0.3705(2) 0.0476(16) Uani 1 1 d . . . 
H5 H 0.7095 0.0505 0.3630 0.057 Uiso 1 1 calc R . . 
B6 B 0.7666(4) 0.2517(6) 0.3322(2) 0.0562(17) Uani 1 1 d . . . 
H6 H 0.7885 0.2155 0.2984 0.067 Uiso 1 1 calc R . . 
B7 B 0.7555(3) 0.4704(5) 0.3916(2) 0.0515(17) Uani 1 1 d . . . 
H7 H 0.7734 0.5692 0.3983 0.062 Uiso 1 1 calc R . . 
B8 B 0.6916(3) 0.3763(5) 0.4275(2) 0.0478(16) Uani 1 1 d . . . 
H8 H 0.6586 0.4153 0.4561 0.057 Uiso 1 1 calc R . . 
B9 B 0.6418(4) 0.2216(5) 0.3964(2) 0.0452(15) Uani 1 1 d . . . 
B10 B 0.6587(4) 0.2507(5) 0.3241(2) 0.0502(16) Uani 1 1 d . . . 
H10 H 0.6186 0.2139 0.2904 0.060 Uiso 1 1 calc R . . 
B11 B 0.7369(3) 0.4090(6) 0.3299(3) 0.0555(18) Uani 1 1 d . . . 
H11 H 0.7368 0.4665 0.2957 0.067 Uiso 1 1 calc R . . 
 
loop_ 
 _atom_site_aniso_label 
 _atom_site_aniso_U_11 
 _atom_site_aniso_U_22 
 _atom_site_aniso_U_33 
 _atom_site_aniso_U_23 
 _atom_site_aniso_U_13 
 _atom_site_aniso_U_12 
N2 0.048(3) 0.067(3) 0.045(3) 0.003(2) 0.007(2) -0.017(2) 
N1 0.046(3) 0.036(2) 0.035(2) 0.0081(17) 0.008(2) 0.0072(17) 
P1 0.0385(8) 0.0366(7) 0.0357(8) 0.0015(6) 0.0058(6) 0.0026(6) 
P2 0.0360(8) 0.0369(7) 0.0399(8) 0.0038(6) 0.0076(6) 0.0031(6) 
C1 0.039(3) 0.045(3) 0.059(4) 0.000(3) 0.017(3) 0.001(2) 
C2 0.036(3) 0.065(3) 0.046(4) 0.009(3) 0.006(3) -0.009(3) 
C11 0.063(4) 0.055(4) 0.087(5) 0.002(3) 0.016(4) 0.010(3) 
C12 0.092(5) 0.057(4) 0.106(6) 0.025(4) 0.017(5) 0.015(4) 
C13 0.068(5) 0.101(5) 0.092(6) 0.033(4) 0.006(4) 0.017(4) 
C14 0.047(4) 0.088(4) 0.057(4) 0.021(3) -0.002(3) -0.007(3) 
C15 0.068(4) 0.090(5) 0.070(5) 0.003(3) 0.033(4) -0.012(3) 
C16 0.111(6) 0.121(6) 0.157(8) 0.016(5) 0.080(6) 0.019(5) 
C17 0.051(4) 0.093(5) 0.072(5) 0.005(4) -0.002(3) -0.019(3) 
C18 0.119(6) 0.072(5) 0.154(8) -0.006(5) -0.018(5) -0.024(4) 
C21 0.055(4) 0.031(3) 0.041(3) 0.001(2) 0.008(3) 0.004(2) 
C22 0.081(5) 0.075(4) 0.054(4) 0.004(3) 0.012(4) -0.023(4) 
C23 0.104(6) 0.092(5) 0.072(6) -0.005(4) -0.001(5) -0.042(4) 
C24 0.133(7) 0.068(4) 0.061(5) -0.021(4) 0.001(5) -0.023(5) 
C25 0.107(6) 0.062(4) 0.053(5) -0.012(3) 0.016(4) 0.023(4) 
C26 0.067(4) 0.051(3) 0.055(4) -0.001(3) 0.007(3) 0.014(3) 
C31 0.035(3) 0.038(3) 0.032(3) 0.003(2) 0.004(2) 0.005(2) 
C32 0.040(3) 0.051(3) 0.046(4) 0.008(2) 0.009(3) 0.005(2) 
C33 0.067(4) 0.077(4) 0.044(4) -0.002(3) 0.020(3) 0.021(3) 
C34 0.077(4) 0.068(4) 0.061(4) 0.000(3) 0.024(4) 0.034(3) 
C35 0.070(4) 0.063(4) 0.055(4) 0.016(3) 0.019(3) 0.026(3) 
C36 0.058(4) 0.059(3) 0.041(3) 0.010(3) 0.012(3) 0.022(3) 
C41 0.041(3) 0.037(3) 0.036(3) -0.003(2) 0.010(3) -0.006(2) 
C42 0.053(4) 0.060(4) 0.062(4) 0.016(3) 0.017(3) 0.002(3) 
C43 0.074(5) 0.066(4) 0.080(5) 0.013(3) 0.039(4) -0.005(4) 
C44 0.057(4) 0.060(4) 0.087(5) -0.011(3) 0.037(4) -0.018(3) 
C45 0.048(4) 0.074(4) 0.066(4) -0.002(3) 0.010(3) -0.003(3) 
C46 0.053(4) 0.053(3) 0.044(4) 0.002(3) 0.011(3) -0.002(3) 
C51 0.038(3) 0.037(3) 0.036(3) 0.004(2) 0.001(3) 0.004(2) 
C52 0.040(3) 0.050(3) 0.048(4) -0.001(3) 0.010(3) 0.000(2) 
C53 0.051(4) 0.053(3) 0.060(4) -0.006(3) 0.021(3) 0.008(3) 
C54 0.073(5) 0.055(4) 0.060(4) -0.013(3) 0.020(4) 0.006(3) 
C55 0.079(5) 0.066(4) 0.073(5) -0.023(3) 0.029(4) -0.022(3) 
C56 0.049(4) 0.064(4) 0.058(4) -0.013(3) 0.020(3) -0.010(3) 
C61 0.030(3) 0.035(3) 0.036(3) 0.002(2) 0.005(2) 0.004(2) 
C62 0.046(4) 0.061(3) 0.064(4) 0.019(3) 0.012(3) 0.000(3) 
C63 0.042(4) 0.078(4) 0.074(5) 0.011(3) 0.018(3) 0.005(3) 
C64 0.055(4) 0.067(4) 0.066(4) 0.008(3) 0.014(3) -0.013(3) 
C65 0.069(4) 0.057(4) 0.068(4) 0.023(3) 0.016(4) -0.005(3) 
C66 0.044(3) 0.059(3) 0.060(4) 0.011(3) 0.015(3) 0.003(3) 
C71 0.034(3) 0.037(3) 0.032(3) 0.006(2) 0.008(2) 0.004(2) 
C72 0.051(4) 0.057(3) 0.045(4) 0.000(3) 0.010(3) 0.007(3) 
C73 0.041(4) 0.078(4) 0.053(4) 0.010(3) 0.007(3) 0.009(3) 
C74 0.046(4) 0.062(4) 0.047(4) 0.009(3) 0.000(3) -0.012(3) 
C75 0.066(4) 0.045(3) 0.056(4) -0.001(3) 0.001(3) -0.003(3) 
C76 0.048(4) 0.044(3) 0.052(4) -0.004(3) 0.006(3) 0.009(2) 
B1 0.051(4) 0.056(4) 0.062(5) 0.008(3) 0.013(4) 0.005(3) 
B2 0.035(4) 0.066(4) 0.066(5) 0.007(3) 0.014(3) -0.006(3) 
B3 0.043(4) 0.055(4) 0.051(4) 0.003(3) -0.004(3) -0.006(3) 
B4 0.047(4) 0.042(3) 0.050(4) 0.002(3) 0.010(3) 0.006(3) 
B5 0.057(4) 0.047(4) 0.040(4) -0.007(3) 0.010(3) -0.004(3) 
B6 0.059(4) 0.062(4) 0.052(5) -0.007(3) 0.025(4) 0.000(3) 
B7 0.043(4) 0.045(4) 0.066(5) -0.002(3) 0.008(3) -0.008(3) 
B8 0.047(4) 0.043(3) 0.055(5) -0.010(3) 0.015(3) -0.003(3) 
B9 0.054(4) 0.045(3) 0.036(4) 0.002(3) 0.005(3) -0.006(3) 
B10 0.050(4) 0.063(4) 0.038(4) -0.006(3) 0.009(3) -0.013(3) 
B11 0.041(4) 0.073(4) 0.055(5) 0.005(3) 0.013(4) -0.015(3) 
 
_geom_special_details 
; 
 All esds (except the esd in the dihedral angle between two l.s. planes) 
 are estimated using the full covariance matrix.  The cell esds are taken 
 into account individually in the estimation of esds in distances, angles 
 and torsion angles; correlations between esds in cell parameters are only 
 used when they are defined by crystal symmetry.  An approximate (isotropic) 
 treatment of cell esds is used for estimating esds involving l.s. planes. 
; 
 
loop_ 
 _geom_bond_atom_site_label_1 
 _geom_bond_atom_site_label_2 
 _geom_bond_distance 
 _geom_bond_site_symmetry_2 
 _geom_bond_publ_flag 
N2 B9 1.411(6) . ? 
N2 C15 1.463(6) . ? 
N2 C17 1.465(6) . ? 
N1 P1 1.578(3) . ? 
N1 P2 1.585(3) . ? 
P1 C21 1.784(5) . ? 
P1 C31 1.787(4) . ? 
P1 C41 1.809(5) . ? 
P2 C61 1.782(4) . ? 
P2 C51 1.791(5) . ? 
P2 C71 1.798(5) . ? 
C1 C11 1.518(6) . ? 
C1 C2 1.542(6) . ? 
C1 B8 1.674(7) . ? 
C1 B7 1.683(7) . ? 
C1 B11 1.993(7) . ? 
C2 C14 1.547(6) . ? 
C2 B10 1.625(7) . ? 
C11 C12 1.538(7) . ? 
C12 C13 1.494(8) . ? 
C13 C14 1.503(7) . ? 
C15 C16 1.519(7) . ? 
C17 C18 1.490(7) . ? 
C21 C26 1.375(6) . ? 
C21 C22 1.388(7) . ? 
C22 C23 1.379(8) . ? 
C23 C24 1.349(8) . ? 
C24 C25 1.346(8) . ? 
C25 C26 1.412(7) . ? 
C31 C32 1.388(6) . ? 
C31 C36 1.390(6) . ? 
C32 C33 1.379(6) . ? 
C33 C34 1.366(7) . ? 
C34 C35 1.373(6) . ? 
C35 C36 1.368(6) . ? 
C41 C46 1.372(6) . ? 
C41 C42 1.396(6) . ? 
C42 C43 1.372(7) . ? 
C43 C44 1.378(7) . ? 
C44 C45 1.367(7) . ? 
C45 C46 1.375(6) . ? 
C51 C52 1.394(6) . ? 
C51 C56 1.398(6) . ? 
C52 C53 1.377(6) . ? 
C53 C54 1.370(6) . ? 
C54 C55 1.350(7) . ? 
C55 C56 1.374(6) . ? 
C61 C62 1.370(6) . ? 
C61 C66 1.386(6) . ? 
C62 C63 1.404(6) . ? 
C63 C64 1.368(7) . ? 
C64 C65 1.356(7) . ? 
C65 C66 1.373(6) . ? 
C71 C72 1.375(6) . ? 
C71 C76 1.386(6) . ? 
C72 C73 1.383(6) . ? 
C73 C74 1.368(7) . ? 
C74 C75 1.370(6) . ? 
C75 C76 1.382(6) . ? 
B1 B2 1.739(8) . ? 
B1 B3 1.745(8) . ? 
B1 B4 1.755(8) . ? 
B1 B5 1.776(8) . ? 
B1 B6 1.787(9) . ? 
B2 B11 1.732(8) . ? 
B2 B7 1.755(8) . ? 
B2 B3 1.766(8) . ? 
B2 B6 1.768(8) . ? 
B3 B4 1.755(8) . ? 
B3 B7 1.765(8) . ? 
B3 B8 1.816(8) . ? 
B4 B9 1.693(8) . ? 
B4 B5 1.803(8) . ? 
B4 B8 1.807(7) . ? 
B5 B9 1.703(8) . ? 
B5 B10 1.782(8) . ? 
B5 B6 1.782(8) . ? 
B6 B11 1.747(8) . ? 
B6 B10 1.783(8) . ? 
B7 B11 1.751(9) . ? 
B7 B8 1.849(8) . ? 
B8 B9 1.966(8) . ? 
B9 B10 2.024(8) . ? 
B10 B11 2.124(8) . ? 
 
loop_ 
 _geom_angle_atom_site_label_1 
 _geom_angle_atom_site_label_2 
 _geom_angle_atom_site_label_3 
 _geom_angle 
 _geom_angle_site_symmetry_1 
 _geom_angle_site_symmetry_3 
 _geom_angle_publ_flag 
B9 N2 C15 122.3(4) . . ? 
B9 N2 C17 122.3(4) . . ? 
C15 N2 C17 115.4(4) . . ? 
P1 N1 P2 138.0(2) . . ? 
N1 P1 C21 115.1(2) . . ? 
N1 P1 C31 107.1(2) . . ? 
C21 P1 C31 106.9(2) . . ? 
N1 P1 C41 112.8(2) . . ? 
C21 P1 C41 107.4(2) . . ? 
C31 P1 C41 107.2(2) . . ? 
N1 P2 C61 109.4(2) . . ? 
N1 P2 C51 113.9(2) . . ? 
C61 P2 C51 106.8(2) . . ? 
N1 P2 C71 109.9(2) . . ? 
C61 P2 C71 105.9(2) . . ? 
C51 P2 C71 110.5(2) . . ? 
C11 C1 C2 110.0(4) . . ? 
C11 C1 B8 115.1(4) . . ? 
C2 C1 B8 116.5(4) . . ? 
C11 C1 B7 108.9(4) . . ? 
C2 C1 B7 133.2(4) . . ? 
B8 C1 B7 66.8(3) . . ? 
C11 C1 B11 130.0(4) . . ? 
C2 C1 B11 78.9(3) . . ? 
B8 C1 B11 102.0(4) . . ? 
B7 C1 B11 56.1(3) . . ? 
C1 C2 C14 115.6(4) . . ? 
C1 C2 B10 105.2(4) . . ? 
C14 C2 B10 114.4(4) . . ? 
C1 C11 C12 112.6(5) . . ? 
C13 C12 C11 110.5(5) . . ? 
C12 C13 C14 113.0(5) . . ? 
C13 C14 C2 111.2(5) . . ? 
N2 C15 C16 114.4(5) . . ? 
N2 C17 C18 115.0(5) . . ? 
C26 C21 C22 118.8(5) . . ? 
C26 C21 P1 121.7(4) . . ? 
C22 C21 P1 119.5(4) . . ? 
C23 C22 C21 120.7(6) . . ? 
C24 C23 C22 119.9(7) . . ? 
C25 C24 C23 121.1(7) . . ? 
C24 C25 C26 120.3(6) . . ? 
C21 C26 C25 119.2(6) . . ? 
C32 C31 C36 118.2(4) . . ? 
C32 C31 P1 120.3(3) . . ? 
C36 C31 P1 121.4(4) . . ? 
C33 C32 C31 120.3(5) . . ? 
C34 C33 C32 120.3(5) . . ? 
C33 C34 C35 120.0(5) . . ? 
C36 C35 C34 120.0(5) . . ? 
C35 C36 C31 121.1(5) . . ? 
C46 C41 C42 119.2(4) . . ? 
C46 C41 P1 120.8(4) . . ? 
C42 C41 P1 120.1(4) . . ? 
C43 C42 C41 120.1(5) . . ? 
C42 C43 C44 120.2(5) . . ? 
C45 C44 C43 119.5(5) . . ? 
C44 C45 C46 120.9(5) . . ? 
C41 C46 C45 120.1(5) . . ? 
C52 C51 C56 117.4(4) . . ? 
C52 C51 P2 121.7(4) . . ? 
C56 C51 P2 120.2(4) . . ? 
C53 C52 C51 121.0(5) . . ? 
C54 C53 C52 119.8(5) . . ? 
C55 C54 C53 120.5(5) . . ? 
C54 C55 C56 120.6(5) . . ? 
C55 C56 C51 120.7(5) . . ? 
C62 C61 C66 118.3(4) . . ? 
C62 C61 P2 121.7(4) . . ? 
C66 C61 P2 120.0(3) . . ? 
C61 C62 C63 120.5(5) . . ? 
C64 C63 C62 119.6(5) . . ? 
C65 C64 C63 120.2(5) . . ? 
C64 C65 C66 120.3(5) . . ? 
C65 C66 C61 121.1(5) . . ? 
C72 C71 C76 118.7(4) . . ? 
C72 C71 P2 124.4(4) . . ? 
C76 C71 P2 116.9(4) . . ? 
C71 C72 C73 120.1(5) . . ? 
C74 C73 C72 120.8(5) . . ? 
C73 C74 C75 119.6(5) . . ? 
C74 C75 C76 119.9(5) . . ? 
C75 C76 C71 120.8(5) . . ? 
B2 B1 B3 60.9(3) . . ? 
B2 B1 B4 110.0(4) . . ? 
B3 B1 B4 60.2(3) . . ? 
B2 B1 B5 111.2(4) . . ? 
B3 B1 B5 110.4(4) . . ? 
B4 B1 B5 61.4(3) . . ? 
B2 B1 B6 60.1(3) . . ? 
B3 B1 B6 107.1(4) . . ? 
B4 B1 B6 107.3(4) . . ? 
B5 B1 B6 60.0(3) . . ? 
B11 B2 B1 110.5(4) . . ? 
B11 B2 B7 60.3(3) . . ? 
B1 B2 B7 109.5(4) . . ? 
B11 B2 B3 108.3(4) . . ? 
B1 B2 B3 59.7(3) . . ? 
B7 B2 B3 60.2(3) . . ? 
B11 B2 B6 59.9(3) . . ? 
B1 B2 B6 61.3(3) . . ? 
B7 B2 B6 107.6(4) . . ? 
B3 B2 B6 107.1(4) . . ? 
B1 B3 B4 60.2(3) . . ? 
B1 B3 B7 108.8(4) . . ? 
B4 B3 B7 112.4(4) . . ? 
B1 B3 B2 59.4(3) . . ? 
B4 B3 B2 108.7(4) . . ? 
B7 B3 B2 59.6(3) . . ? 
B1 B3 B8 107.3(4) . . ? 
B4 B3 B8 60.8(3) . . ? 
B7 B3 B8 62.2(3) . . ? 
B2 B3 B8 107.5(4) . . ? 
B9 B4 B1 111.8(4) . . ? 
B9 B4 B3 120.1(4) . . ? 
B1 B4 B3 59.6(3) . . ? 
B9 B4 B5 58.2(3) . . ? 
B1 B4 B5 59.9(3) . . ? 
B3 B4 B5 108.7(4) . . ? 
B9 B4 B8 68.3(3) . . ? 
B1 B4 B8 107.2(4) . . ? 
B3 B4 B8 61.3(3) . . ? 
B5 B4 B8 107.2(4) . . ? 
B9 B5 B1 110.3(4) . . ? 
B9 B5 B10 71.0(3) . . ? 
B1 B5 B10 112.5(4) . . ? 
B9 B5 B6 115.0(4) . . ? 
B1 B5 B6 60.3(3) . . ? 
B10 B5 B6 60.0(3) . . ? 
B9 B5 B4 57.7(3) . . ? 
B1 B5 B4 58.7(3) . . ? 
B10 B5 B4 112.9(4) . . ? 
B6 B5 B4 105.4(4) . . ? 
B11 B6 B2 59.0(3) . . ? 
B11 B6 B5 115.7(4) . . ? 
B2 B6 B5 109.6(4) . . ? 
B11 B6 B10 74.0(3) . . ? 
B2 B6 B10 120.8(4) . . ? 
B5 B6 B10 60.0(3) . . ? 
B11 B6 B1 107.6(4) . . ? 
B2 B6 B1 58.6(3) . . ? 
B5 B6 B1 59.7(3) . . ? 
B10 B6 B1 111.9(4) . . ? 
C1 B7 B11 70.9(3) . . ? 
C1 B7 B2 120.4(4) . . ? 
B11 B7 B2 59.2(3) . . ? 
C1 B7 B3 112.6(4) . . ? 
B11 B7 B3 107.4(4) . . ? 
B2 B7 B3 60.2(3) . . ? 
C1 B7 B8 56.4(3) . . ? 
B11 B7 B8 105.0(4) . . ? 
B2 B7 B8 106.5(4) . . ? 
B3 B7 B8 60.3(3) . . ? 
C1 B8 B4 126.3(4) . . ? 
C1 B8 B3 110.6(4) . . ? 
B4 B8 B3 58.0(3) . . ? 
C1 B8 B7 56.8(3) . . ? 
B4 B8 B7 106.3(4) . . ? 
B3 B8 B7 57.6(3) . . ? 
C1 B8 B9 88.3(4) . . ? 
B4 B8 B9 53.1(3) . . ? 
B3 B8 B9 104.3(4) . . ? 
B7 B8 B9 118.5(4) . . ? 
N2 B9 B4 131.8(5) . . ? 
N2 B9 B5 134.4(5) . . ? 
B4 B9 B5 64.1(3) . . ? 
N2 B9 B8 120.1(4) . . ? 
B4 B9 B8 58.6(3) . . ? 
B5 B9 B8 104.5(4) . . ? 
N2 B9 B10 120.0(4) . . ? 
B4 B9 B10 106.6(4) . . ? 
B5 B9 B10 56.3(3) . . ? 
B8 B9 B10 98.9(3) . . ? 
C2 B10 B5 130.1(4) . . ? 
C2 B10 B6 124.5(4) . . ? 
B5 B10 B6 60.0(3) . . ? 
C2 B10 B9 80.5(3) . . ? 
B5 B10 B9 52.7(3) . . ? 
B6 B10 B9 100.9(4) . . ? 
C2 B10 B11 73.3(3) . . ? 
B5 B10 B11 99.5(4) . . ? 
B6 B10 B11 52.2(3) . . ? 
B9 B10 B11 103.7(3) . . ? 
B2 B11 B6 61.1(4) . . ? 
B2 B11 B7 60.5(3) . . ? 
B6 B11 B7 108.8(5) . . ? 
B2 B11 C1 106.3(4) . . ? 
B6 B11 C1 114.7(4) . . ? 
B7 B11 C1 53.0(3) . . ? 
B2 B11 B10 105.9(4) . . ? 
B6 B11 B10 53.8(3) . . ? 
B7 B11 B10 112.0(4) . . ? 
C1 B11 B10 75.3(3) . . ? 
 
_diffrn_measured_fraction_theta_max    1.000 
_diffrn_reflns_theta_full              25.25 
_diffrn_measured_fraction_theta_full   1.000 
_refine_diff_density_max    0.233 
_refine_diff_density_min   -0.302 
_refine_diff_density_rms    0.053 
#===END

data_[5][PSH] 
 
_audit_creation_method            SHELXL-97 
_chemical_name_systematic 
; 
 ? 
; 
_chemical_name_common             ? 
_chemical_melting_point           ? 
_chemical_formula_moiety          ? 
_chemical_formula_sum 
 'C21 H41 B11 N2 O' 
_chemical_formula_weight          456.47 
 
loop_ 
 _atom_type_symbol 
 _atom_type_description 
 _atom_type_scat_dispersion_real 
 _atom_type_scat_dispersion_imag 
 _atom_type_scat_source 
 'C'  'C'   0.0033   0.0016 
 'International Tables Vol C Tables 4.2.6.8 and 6.1.1.4' 
 'H'  'H'   0.0000   0.0000 
 'International Tables Vol C Tables 4.2.6.8 and 6.1.1.4' 
 'B'  'B'   0.0013   0.0007 
 'International Tables Vol C Tables 4.2.6.8 and 6.1.1.4' 
 'N'  'N'   0.0061   0.0033 
 'International Tables Vol C Tables 4.2.6.8 and 6.1.1.4' 
 'O'  'O'   0.0106   0.0060 
 'International Tables Vol C Tables 4.2.6.8 and 6.1.1.4' 
 
_symmetry_cell_setting            Triclinic 
_symmetry_space_group_name_H-M    P-1 
 
loop_ 
 _symmetry_equiv_pos_as_xyz 
 'x, y, z' 
 '-x, -y, -z' 
 
_cell_length_a                    8.3906(15) 
_cell_length_b                    10.904(2) 
_cell_length_c                    15.541(3) 
_cell_angle_alpha                 99.131(3) 
_cell_angle_beta                  94.715(3) 
_cell_angle_gamma                 102.261(3) 
_cell_volume                      1361.8(4) 
_cell_formula_units_Z             2 
_cell_measurement_temperature     293(2) 
_cell_measurement_reflns_used     ? 
_cell_measurement_theta_min       ? 
_cell_measurement_theta_max       ? 
 
_exptl_crystal_description        block 
_exptl_crystal_colour             colourless 
_exptl_crystal_size_max           0.50 
_exptl_crystal_size_mid           0.40 
_exptl_crystal_size_min           0.30 
_exptl_crystal_density_meas       ? 
_exptl_crystal_density_diffrn     1.113 
_exptl_crystal_density_method     'not measured' 
_exptl_crystal_F_000              488 
_exptl_absorpt_coefficient_mu     0.060 
_exptl_absorpt_correction_type    multi-scan  
_exptl_absorpt_correction_T_min   0.5384 
_exptl_absorpt_correction_T_max   0.7456  
_exptl_absorpt_process_details    ? 
 
_exptl_special_details 
; 
 ? 
; 
 
_diffrn_ambient_temperature       293(2) 
_diffrn_radiation_wavelength      0.71073 
_diffrn_radiation_type            MoK\a 
_diffrn_radiation_source          'fine-focus sealed tube' 
_diffrn_radiation_monochromator   graphite 
_diffrn_measurement_device_type   'BRUKER SMART CCD DIFFRACTOMETER' 
_diffrn_measurement_method        'OMEGA SCAN' 
_diffrn_detector_area_resol_mean  ? 
_diffrn_reflns_number             7419 
_diffrn_reflns_av_R_equivalents   0.0362 
_diffrn_reflns_av_sigmaI/netI     0.0661 
_diffrn_reflns_limit_h_min        -9 
_diffrn_reflns_limit_h_max        6 
_diffrn_reflns_limit_k_min        -12 
_diffrn_reflns_limit_k_max        12 
_diffrn_reflns_limit_l_min        -18 
_diffrn_reflns_limit_l_max        18 
_diffrn_reflns_theta_min          1.34 
_diffrn_reflns_theta_max          25.00 
_reflns_number_total              4751 
_reflns_number_gt                 2965 
_reflns_threshold_expression      >2sigma(I) 
 
_computing_data_collection        'BRUKER SMART CCD DIFFRACTOMETER' 
_computing_cell_refinement        'BRUKER SMART CCD DIFFRACTOMETER' 
_computing_data_reduction         'BRUKER SMART CCD DIFFRACTOMETER' 
_computing_structure_solution     'SHELXS-97 (Sheldrick, 2008)' 
_computing_structure_refinement   'SHELXL-97 (Sheldrick, 2008)' 
_computing_molecular_graphics     'SIEMENS SHELXTL' 
_computing_publication_material   'SIEMENS SHELXTL'  
 
_refine_special_details 
; 
 Refinement of F^2^ against ALL reflections.  The weighted R-factor wR and 
 goodness of fit S are based on F^2^, conventional R-factors R are based 
 on F, with F set to zero for negative F^2^. The threshold expression of 
 F^2^ > 2sigma(F^2^) is used only for calculating R-factors(gt) etc. and is 
 not relevant to the choice of reflections for refinement.  R-factors based 
 on F^2^ are statistically about twice as large as those based on F, and R- 
 factors based on ALL data will be even larger. 
; 
 
_refine_ls_structure_factor_coef  Fsqd  
_refine_ls_matrix_type            full 
_refine_ls_weighting_scheme       calc  
_refine_ls_weighting_details 
 'calc w=1/[\s^2^(Fo^2^)+(0.1085P)^2^+0.7977P] where P=(Fo^2^+2Fc^2^)/3' 
_atom_sites_solution_primary      direct 
_atom_sites_solution_secondary    difmap 
_atom_sites_solution_hydrogens    geom 
_refine_ls_hydrogen_treatment     riding
_refine_ls_extinction_method      none 
_refine_ls_extinction_coef        ? 
_refine_ls_number_reflns          4751 
_refine_ls_number_parameters      320 
_refine_ls_number_restraints      2 
_refine_ls_R_factor_all           0.1147 
_refine_ls_R_factor_gt            0.0762 
_refine_ls_wR_factor_ref          0.2367 
_refine_ls_wR_factor_gt           0.2048 
_refine_ls_goodness_of_fit_ref    1.063 
_refine_ls_restrained_S_all       1.261 
_refine_ls_shift/su_max           0.010 
_refine_ls_shift/su_mean          0.001 
 
loop_ 
 _atom_site_label 
 _atom_site_type_symbol 
 _atom_site_fract_x 
 _atom_site_fract_y 
 _atom_site_fract_z 
 _atom_site_U_iso_or_equiv 
 _atom_site_adp_type 
 _atom_site_occupancy 
 _atom_site_symmetry_multiplicity 
 _atom_site_calc_flag 
 _atom_site_refinement_flags 
 _atom_site_disorder_assembly 
 _atom_site_disorder_group 
O1 O 0.6136(4) 0.4072(3) 0.40296(17) 0.0622(9) Uani 1 1 d . . . 
N1 N 0.2750(4) 0.6954(3) 0.15267(19) 0.0427(8) Uani 1 1 d . . . 
H1A H 0.2056 0.7356 0.1260 0.051 Uiso 1 1 calc R . . 
N2 N 0.0421(4) 0.8162(3) 0.12575(19) 0.0438(8) Uani 1 1 d . . . 
C21 C 0.2318(5) 0.6948(4) 0.2425(2) 0.0434(9) Uani 1 1 d . . . 
C22 C 0.3162(6) 0.6385(5) 0.2971(3) 0.0669(13) Uani 1 1 d . . . 
H22A H 0.3969 0.5985 0.2768 0.080 Uiso 1 1 calc R . . 
C23 C 0.2819(7) 0.6406(6) 0.3840(3) 0.0814(16) Uani 1 1 d . . . 
H23A H 0.3401 0.6022 0.4212 0.098 Uiso 1 1 calc R . . 
C24 C 0.1657(7) 0.6976(5) 0.4136(3) 0.0696(14) Uani 1 1 d . . . 
H24A H 0.1449 0.6988 0.4716 0.083 Uiso 1 1 calc R . . 
C25 C 0.0733(5) 0.7563(4) 0.3585(3) 0.0523(10) Uani 1 1 d . . . 
C26 C -0.0485(6) 0.8166(4) 0.3901(3) 0.0678(13) Uani 1 1 d . . . 
H26A H -0.0696 0.8173 0.4479 0.081 Uiso 1 1 calc R . . 
C27 C -0.1356(7) 0.8735(5) 0.3376(4) 0.0774(15) Uani 1 1 d . . . 
H27A H -0.2152 0.9132 0.3597 0.093 Uiso 1 1 calc R . . 
C28 C -0.1056(6) 0.8726(4) 0.2504(3) 0.0638(12) Uani 1 1 d . . . 
H28A H -0.1662 0.9116 0.2149 0.077 Uiso 1 1 calc R . . 
C29 C 0.0107(5) 0.8155(3) 0.2166(2) 0.0424(9) Uani 1 1 d . . . 
C30 C 0.1059(4) 0.7549(3) 0.2698(2) 0.0399(8) Uani 1 1 d . . . 
C31 C 0.2473(6) 0.5643(4) 0.0992(3) 0.0597(12) Uani 1 1 d . . . 
H31A H 0.1366 0.5186 0.1008 0.089 Uiso 1 1 calc R . . 
H31B H 0.3227 0.5198 0.1229 0.089 Uiso 1 1 calc R . . 
H31C H 0.2646 0.5705 0.0396 0.089 Uiso 1 1 calc R . . 
C32 C 0.4434(5) 0.7709(5) 0.1517(3) 0.0730(14) Uani 1 1 d . . . 
H32A H 0.4562 0.8546 0.1859 0.109 Uiso 1 1 calc R . . 
H32B H 0.4618 0.7779 0.0923 0.109 Uiso 1 1 calc R . . 
H32C H 0.5215 0.7292 0.1762 0.109 Uiso 1 1 calc R . . 
C33 C -0.1020(6) 0.7471(5) 0.0623(3) 0.0748(14) Uani 1 1 d . . . 
H33A H -0.1390 0.6626 0.0742 0.112 Uiso 1 1 calc R . . 
H33B H -0.0720 0.7420 0.0038 0.112 Uiso 1 1 calc R . . 
H33C H -0.1886 0.7919 0.0678 0.112 Uiso 1 1 calc R . . 
C34 C 0.1035(7) 0.9472(4) 0.1093(3) 0.0690(13) Uani 1 1 d . . . 
H34A H 0.1975 0.9897 0.1510 0.104 Uiso 1 1 calc R . . 
H34B H 0.0187 0.9937 0.1154 0.104 Uiso 1 1 calc R . . 
H34C H 0.1342 0.9431 0.0509 0.104 Uiso 1 1 calc R . . 
C1 C 0.4360(4) 0.2296(3) 0.2734(2) 0.0388(8) Uani 1 1 d . . . 
C2 C 0.5594(5) 0.1760(3) 0.3060(2) 0.0411(9) Uani 1 1 d . . . 
C11 C 0.2789(5) 0.2240(4) 0.3169(3) 0.0543(11) Uani 1 1 d . . . 
H11A H 0.2799 0.3089 0.3477 0.065 Uiso 1 1 calc R . . 
H11B H 0.1858 0.1994 0.2714 0.065 Uiso 1 1 calc R . . 
C12 C 0.2547(7) 0.1341(6) 0.3798(4) 0.0934(19) Uani 1 1 d . . . 
H12A H 0.1801 0.1605 0.4196 0.112 Uiso 1 1 calc R . . 
H12B H 0.2004 0.0503 0.3468 0.112 Uiso 1 1 calc R . . 
C13 C 0.3933(9) 0.1217(8) 0.4301(5) 0.123(3) Uani 1 1 d . . . 
H13A H 0.3623 0.0476 0.4576 0.147 Uiso 1 1 calc R . . 
H13B H 0.4265 0.1958 0.4767 0.147 Uiso 1 1 calc R . . 
C14 C 0.5384(6) 0.1085(4) 0.3838(3) 0.0601(12) Uani 1 1 d . . . 
H14A H 0.5310 0.0184 0.3636 0.072 Uiso 1 1 calc R . . 
H14B H 0.6363 0.1409 0.4257 0.072 Uiso 1 1 calc R . . 
C15 C 0.7076(7) 0.5329(4) 0.4358(3) 0.0800(16) Uani 1 1 d . . . 
H15A H 0.6870 0.5593 0.4950 0.120 Uiso 1 1 calc R . . 
H15B H 0.6771 0.5900 0.3998 0.120 Uiso 1 1 calc R . . 
H15C H 0.8223 0.5345 0.4349 0.120 Uiso 1 1 calc R . . 
B3 B 0.6194(6) 0.3421(4) 0.3157(3) 0.0468(11) Uani 1 1 d D . . 
B4 B 0.7310(6) 0.1929(4) 0.2713(3) 0.0503(12) Uani 1 1 d D . . 
H4 H 0.7751 0.1230 0.3052 0.060 Uiso 1 1 calc R . . 
B5 B 0.6709(6) 0.1202(4) 0.1426(3) 0.0474(11) Uani 1 1 d . . . 
H5 H 0.6419 0.0153 0.1275 0.057 Uiso 1 1 calc R . . 
B6 B 0.5091(6) 0.1881(5) 0.1004(3) 0.0498(11) Uani 1 1 d . . . 
H6 H 0.4022 0.1160 0.0647 0.060 Uiso 1 1 calc R . . 
B7 B 0.4558(6) 0.3091(5) 0.1983(3) 0.0474(11) Uani 1 1 d D . . 
H7 H 0.3258 0.3123 0.1863 0.057 Uiso 1 1 calc R . . 
B8 B 0.8092(6) 0.3657(5) 0.2684(3) 0.0537(12) Uani 1 1 d . . . 
H8 H 0.9135 0.4209 0.3163 0.064 Uiso 1 1 calc R . . 
B9 B 0.8360(6) 0.2464(5) 0.1834(3) 0.0538(12) Uani 1 1 d . . . 
H9 H 0.9581 0.2249 0.1813 0.065 Uiso 1 1 calc R . . 
B10 B 0.7140(6) 0.2465(5) 0.0857(3) 0.0505(12) Uani 1 1 d . . . 
H10 H 0.7552 0.2319 0.0202 0.061 Uiso 1 1 calc R . . 
B11 B 0.5851(6) 0.3515(5) 0.1186(3) 0.0502(12) Uani 1 1 d . . . 
H11 H 0.5329 0.4025 0.0718 0.060 Uiso 1 1 calc R . . 
B12 B 0.6528(6) 0.4309(5) 0.2277(3) 0.0508(12) Uani 1 1 d . . . 
H12 H 0.6488 0.5314 0.2480 0.061 Uiso 1 1 calc R . . 
B13 B 0.7951(6) 0.3904(5) 0.1596(3) 0.0544(12) Uani 1 1 d . . . 
H13 H 0.8863 0.4648 0.1387 0.065 Uiso 1 1 calc R . . 
H5A H 0.527(4) 0.115(3) 0.152(2) 0.040(9) Uiso 1 1 d . . . 
 
loop_ 
 _atom_site_aniso_label 
 _atom_site_aniso_U_11 
 _atom_site_aniso_U_22 
 _atom_site_aniso_U_33 
 _atom_site_aniso_U_23 
 _atom_site_aniso_U_13 
 _atom_site_aniso_U_12 
O1 0.086(2) 0.0435(16) 0.0466(16) -0.0027(12) 0.0137(15) -0.0016(15) 
N1 0.0388(17) 0.0528(19) 0.0443(17) 0.0169(14) 0.0108(14) 0.0197(14) 
N2 0.0507(19) 0.0388(17) 0.0449(18) 0.0080(13) 0.0041(15) 0.0174(14) 
C21 0.043(2) 0.050(2) 0.039(2) 0.0092(17) 0.0051(16) 0.0145(18) 
C22 0.065(3) 0.094(4) 0.057(3) 0.029(2) 0.009(2) 0.040(3) 
C23 0.083(4) 0.119(5) 0.055(3) 0.038(3) 0.004(3) 0.038(3) 
C24 0.085(4) 0.085(3) 0.036(2) 0.014(2) 0.007(2) 0.010(3) 
C25 0.061(3) 0.050(2) 0.043(2) 0.0062(18) 0.016(2) 0.005(2) 
C26 0.087(4) 0.058(3) 0.059(3) 0.007(2) 0.039(3) 0.010(3) 
C27 0.084(4) 0.069(3) 0.098(4) 0.021(3) 0.056(3) 0.037(3) 
C28 0.061(3) 0.062(3) 0.081(3) 0.017(2) 0.026(2) 0.031(2) 
C29 0.043(2) 0.038(2) 0.048(2) 0.0067(16) 0.0109(17) 0.0121(17) 
C30 0.042(2) 0.0354(19) 0.041(2) 0.0048(15) 0.0074(16) 0.0051(16) 
C31 0.076(3) 0.056(3) 0.059(3) 0.014(2) 0.025(2) 0.032(2) 
C32 0.046(3) 0.102(4) 0.069(3) 0.031(3) 0.009(2) 0.000(3) 
C33 0.063(3) 0.089(4) 0.065(3) -0.002(3) -0.012(2) 0.021(3) 
C34 0.097(4) 0.050(3) 0.072(3) 0.023(2) 0.032(3) 0.026(3) 
C1 0.042(2) 0.039(2) 0.0343(18) 0.0052(15) 0.0068(16) 0.0074(16) 
C2 0.056(2) 0.0287(18) 0.0376(19) 0.0071(15) 0.0017(17) 0.0090(17) 
C11 0.053(2) 0.067(3) 0.043(2) 0.0080(19) 0.0146(19) 0.010(2) 
C12 0.090(4) 0.123(5) 0.080(4) 0.049(4) 0.045(3) 0.018(4) 
C13 0.126(6) 0.175(7) 0.108(5) 0.102(5) 0.051(5) 0.052(5) 
C14 0.094(4) 0.051(2) 0.040(2) 0.0183(18) 0.008(2) 0.021(2) 
C15 0.111(4) 0.045(3) 0.068(3) -0.010(2) 0.013(3) -0.004(3) 
B3 0.056(3) 0.037(2) 0.048(2) 0.0081(19) 0.008(2) 0.009(2) 
B4 0.058(3) 0.048(3) 0.050(3) 0.013(2) 0.000(2) 0.024(2) 
B5 0.057(3) 0.044(2) 0.046(2) 0.0077(19) 0.013(2) 0.021(2) 
B6 0.050(3) 0.065(3) 0.037(2) 0.014(2) 0.007(2) 0.015(2) 
B7 0.044(3) 0.061(3) 0.048(2) 0.018(2) 0.015(2) 0.024(2) 
B8 0.045(3) 0.051(3) 0.061(3) 0.005(2) 0.004(2) 0.008(2) 
B9 0.043(3) 0.065(3) 0.063(3) 0.016(2) 0.015(2) 0.026(2) 
B10 0.054(3) 0.061(3) 0.049(3) 0.018(2) 0.024(2) 0.029(2) 
B11 0.056(3) 0.062(3) 0.050(3) 0.028(2) 0.025(2) 0.032(2) 
B12 0.060(3) 0.042(2) 0.060(3) 0.019(2) 0.024(2) 0.020(2) 
B13 0.053(3) 0.050(3) 0.067(3) 0.020(2) 0.028(2) 0.013(2) 
 
_geom_special_details 
; 
 All esds (except the esd in the dihedral angle between two l.s. planes) 
 are estimated using the full covariance matrix.  The cell esds are taken 
 into account individually in the estimation of esds in distances, angles 
 and torsion angles; correlations between esds in cell parameters are only 
 used when they are defined by crystal symmetry.  An approximate (isotropic) 
 treatment of cell esds is used for estimating esds involving l.s. planes. 
; 
 
loop_ 
 _geom_bond_atom_site_label_1 
 _geom_bond_atom_site_label_2 
 _geom_bond_distance 
 _geom_bond_site_symmetry_2 
 _geom_bond_publ_flag 
O1 C15 1.419(5) . ? 
O1 B3 1.437(5) . ? 
N1 C21 1.471(4) . ? 
N1 C32 1.480(5) . ? 
N1 C31 1.495(5) . ? 
N2 C29 1.458(5) . ? 
N2 C33 1.477(5) . ? 
N2 C34 1.482(5) . ? 
C21 C22 1.361(5) . ? 
C21 C30 1.416(5) . ? 
C22 C23 1.401(6) . ? 
C23 C24 1.338(7) . ? 
C24 C25 1.422(6) . ? 
C25 C26 1.408(6) . ? 
C25 C30 1.425(5) . ? 
C26 C27 1.356(7) . ? 
C27 C28 1.397(7) . ? 
C28 C29 1.363(5) . ? 
C29 C30 1.431(5) . ? 
C1 C2 1.390(5) . ? 
C1 C11 1.524(5) . ? 
C1 B7 1.560(5) . ? 
C1 B3 1.755(6) . ? 
C2 C14 1.516(5) . ? 
C2 B4 1.564(6) . ? 
C2 B3 1.752(5) . ? 
C11 C12 1.486(6) . ? 
C12 C13 1.390(8) . ? 
C13 C14 1.485(8) . ? 
B3 B8 1.795(7) . ? 
B3 B12 1.805(6) . ? 
B3 B4 2.098(6) . ? 
B3 B7 2.124(6) . ? 
B4 B9 1.793(7) . ? 
B4 B8 1.868(7) . ? 
B4 B5 2.010(6) . ? 
B5 B9 1.728(7) . ? 
B5 B10 1.743(6) . ? 
B5 B6 1.805(7) . ? 
B6 B11 1.728(7) . ? 
B6 B10 1.749(7) . ? 
B6 B7 1.996(7) . ? 
B7 B11 1.764(6) . ? 
B7 B12 1.859(7) . ? 
B8 B12 1.741(7) . ? 
B8 B13 1.752(7) . ? 
B8 B9 1.765(7) . ? 
B9 B10 1.760(7) . ? 
B9 B13 1.763(7) . ? 
B10 B13 1.757(7) . ? 
B10 B11 1.781(6) . ? 
B11 B13 1.762(7) . ? 
B11 B12 1.764(7) . ? 
B12 B13 1.739(6) . ? 
 
loop_ 
 _geom_angle_atom_site_label_1 
 _geom_angle_atom_site_label_2 
 _geom_angle_atom_site_label_3 
 _geom_angle 
 _geom_angle_site_symmetry_1 
 _geom_angle_site_symmetry_3 
 _geom_angle_publ_flag 
C15 O1 B3 122.1(3) . . ? 
C21 N1 C32 112.1(3) . . ? 
C21 N1 C31 113.0(3) . . ? 
C32 N1 C31 111.8(3) . . ? 
C29 N2 C33 112.5(3) . . ? 
C29 N2 C34 112.1(3) . . ? 
C33 N2 C34 111.1(4) . . ? 
C22 C21 C30 122.1(4) . . ? 
C22 C21 N1 118.9(4) . . ? 
C30 C21 N1 119.0(3) . . ? 
C21 C22 C23 120.1(4) . . ? 
C24 C23 C22 120.2(4) . . ? 
C23 C24 C25 121.4(4) . . ? 
C26 C25 C24 121.2(4) . . ? 
C26 C25 C30 119.5(4) . . ? 
C24 C25 C30 119.3(4) . . ? 
C27 C26 C25 121.2(4) . . ? 
C26 C27 C28 120.0(4) . . ? 
C29 C28 C27 121.1(4) . . ? 
C28 C29 C30 120.6(4) . . ? 
C28 C29 N2 120.7(4) . . ? 
C30 C29 N2 118.7(3) . . ? 
C21 C30 C25 116.8(3) . . ? 
C21 C30 C29 125.7(3) . . ? 
C25 C30 C29 117.5(3) . . ? 
C2 C1 C11 120.4(3) . . ? 
C2 C1 B7 123.0(3) . . ? 
C11 C1 B7 116.3(3) . . ? 
C2 C1 B3 66.5(2) . . ? 
C11 C1 B3 122.4(3) . . ? 
B7 C1 B3 79.5(3) . . ? 
C1 C2 C14 120.6(4) . . ? 
C1 C2 B4 122.6(3) . . ? 
C14 C2 B4 116.5(3) . . ? 
C1 C2 B3 66.8(2) . . ? 
C14 C2 B3 123.6(3) . . ? 
B4 C2 B3 78.3(3) . . ? 
C12 C11 C1 114.5(4) . . ? 
C13 C12 C11 117.7(5) . . ? 
C12 C13 C14 116.9(5) . . ? 
C13 C14 C2 115.9(4) . . ? 
O1 B3 C2 112.1(3) . . ? 
O1 B3 C1 112.4(3) . . ? 
C2 B3 C1 46.7(2) . . ? 
O1 B3 B8 119.8(3) . . ? 
C2 B3 B8 103.5(3) . . ? 
C1 B3 B8 127.2(3) . . ? 
O1 B3 B12 120.2(3) . . ? 
C2 B3 B12 126.9(3) . . ? 
C1 B3 B12 101.9(3) . . ? 
B8 B3 B12 57.8(3) . . ? 
O1 B3 B4 130.9(3) . . ? 
C2 B3 B4 46.9(2) . . ? 
C1 B3 B4 84.1(2) . . ? 
B8 B3 B4 56.7(2) . . ? 
B12 B3 B4 98.9(3) . . ? 
O1 B3 B7 131.7(3) . . ? 
C2 B3 B7 83.4(2) . . ? 
C1 B3 B7 46.23(19) . . ? 
B8 B3 B7 98.3(3) . . ? 
B12 B3 B7 55.8(2) . . ? 
B4 B3 B7 93.7(2) . . ? 
C2 B4 B9 141.4(3) . . ? 
C2 B4 B8 108.1(3) . . ? 
B9 B4 B8 57.6(3) . . ? 
C2 B4 B5 102.4(3) . . ? 
B9 B4 B5 53.7(2) . . ? 
B8 B4 B5 101.1(3) . . ? 
C2 B4 B3 54.9(2) . . ? 
B9 B4 B3 103.4(3) . . ? 
B8 B4 B3 53.4(2) . . ? 
B5 B4 B3 113.8(3) . . ? 
B9 B5 B10 60.9(3) . . ? 
B9 B5 B6 106.5(3) . . ? 
B10 B5 B6 59.0(3) . . ? 
B9 B5 B4 56.7(3) . . ? 
B10 B5 B4 107.5(3) . . ? 
B6 B5 B4 108.7(3) . . ? 
B11 B6 B10 61.6(3) . . ? 
B11 B6 B5 106.8(3) . . ? 
B10 B6 B5 58.7(3) . . ? 
B11 B6 B7 56.0(2) . . ? 
B10 B6 B7 107.1(3) . . ? 
B5 B6 B7 108.5(3) . . ? 
C1 B7 B11 142.6(3) . . ? 
C1 B7 B12 107.6(3) . . ? 
B11 B7 B12 58.2(3) . . ? 
C1 B7 B6 103.0(3) . . ? 
B11 B7 B6 54.3(2) . . ? 
B12 B7 B6 101.9(3) . . ? 
C1 B7 B3 54.3(2) . . ? 
B11 B7 B3 104.0(3) . . ? 
B12 B7 B3 53.4(2) . . ? 
B6 B7 B3 113.8(3) . . ? 
B12 B8 B13 59.7(3) . . ? 
B12 B8 B9 106.9(3) . . ? 
B13 B8 B9 60.2(3) . . ? 
B12 B8 B3 61.4(3) . . ? 
B13 B8 B3 115.5(3) . . ? 
B9 B8 B3 118.5(3) . . ? 
B12 B8 B4 110.8(3) . . ? 
B13 B8 B4 109.9(3) . . ? 
B9 B8 B4 59.1(3) . . ? 
B3 B8 B4 69.8(3) . . ? 
B5 B9 B10 60.0(3) . . ? 
B5 B9 B13 110.6(3) . . ? 
B10 B9 B13 59.8(3) . . ? 
B5 B9 B8 118.2(3) . . ? 
B10 B9 B8 110.6(3) . . ? 
B13 B9 B8 59.6(3) . . ? 
B5 B9 B4 69.6(3) . . ? 
B10 B9 B4 117.0(3) . . ? 
B13 B9 B4 112.9(3) . . ? 
B8 B9 B4 63.3(3) . . ? 
B5 B10 B6 62.2(3) . . ? 
B5 B10 B13 110.2(3) . . ? 
B6 B10 B13 109.7(3) . . ? 
B5 B10 B9 59.1(3) . . ? 
B6 B10 B9 107.5(3) . . ? 
B13 B10 B9 60.2(3) . . ? 
B5 B10 B11 107.2(3) . . ? 
B6 B10 B11 58.6(3) . . ? 
B13 B10 B11 59.7(3) . . ? 
B9 B10 B11 104.1(3) . . ? 
B6 B11 B13 110.4(3) . . ? 
B6 B11 B12 118.0(3) . . ? 
B13 B11 B12 59.1(3) . . ? 
B6 B11 B7 69.7(3) . . ? 
B13 B11 B7 112.9(3) . . ? 
B12 B11 B7 63.6(3) . . ? 
B6 B11 B10 59.7(3) . . ? 
B13 B11 B10 59.5(3) . . ? 
B12 B11 B10 109.6(3) . . ? 
B7 B11 B10 116.5(3) . . ? 
B13 B12 B8 60.5(3) . . ? 
B13 B12 B11 60.4(3) . . ? 
B8 B12 B11 107.8(3) . . ? 
B13 B12 B3 115.7(3) . . ? 
B8 B12 B3 60.8(3) . . ? 
B11 B12 B3 118.9(3) . . ? 
B13 B12 B7 109.5(3) . . ? 
B8 B12 B7 111.3(3) . . ? 
B11 B12 B7 58.2(3) . . ? 
B3 B12 B7 70.9(2) . . ? 
B12 B13 B8 59.8(3) . . ? 
B12 B13 B10 111.9(3) . . ? 
B8 B13 B10 111.4(3) . . ? 
B12 B13 B11 60.5(3) . . ? 
B8 B13 B11 107.4(3) . . ? 
B10 B13 B11 60.8(3) . . ? 
B12 B13 B9 107.0(3) . . ? 
B8 B13 B9 60.3(3) . . ? 
B10 B13 B9 60.0(3) . . ? 
B11 B13 B9 104.8(3) . . ? 
 
_diffrn_measured_fraction_theta_max    0.993 
_diffrn_reflns_theta_full              25.00 
_diffrn_measured_fraction_theta_full   0.993 
_refine_diff_density_max    0.492 
_refine_diff_density_min   -0.421 
_refine_diff_density_rms    0.048 
#===END


data_[6][PSH] 
 
_audit_creation_method            SHELXL-97 
_chemical_name_systematic 
; 
 ? 
; 
_chemical_name_common             ? 
_chemical_melting_point           ? 
_chemical_formula_moiety          ? 
_chemical_formula_sum 
 'C22 H45 B11 N2 O2' 
_chemical_formula_weight          488.51 
 
loop_ 
 _atom_type_symbol 
 _atom_type_description 
 _atom_type_scat_dispersion_real 
 _atom_type_scat_dispersion_imag 
 _atom_type_scat_source 
 'C'  'C'   0.0033   0.0016 
 'International Tables Vol C Tables 4.2.6.8 and 6.1.1.4' 
 'H'  'H'   0.0000   0.0000 
 'International Tables Vol C Tables 4.2.6.8 and 6.1.1.4' 
 'B'  'B'   0.0013   0.0007 
 'International Tables Vol C Tables 4.2.6.8 and 6.1.1.4' 
 'N'  'N'   0.0061   0.0033 
 'International Tables Vol C Tables 4.2.6.8 and 6.1.1.4' 
 'O'  'O'   0.0106   0.0060 
 'International Tables Vol C Tables 4.2.6.8 and 6.1.1.4' 
 
_symmetry_cell_setting            Triclinic 
_symmetry_space_group_name_H-M    P-1 
 
loop_ 
 _symmetry_equiv_pos_as_xyz 
 'x, y, z' 
 '-x, -y, -z' 
 
_cell_length_a                    9.4687(7) 
_cell_length_b                    9.6287(8) 
_cell_length_c                    17.0590(13) 
_cell_angle_alpha                 102.413(2) 
_cell_angle_beta                  97.696(2) 
_cell_angle_gamma                 97.792(2) 
_cell_volume                      1483.4(2) 
_cell_formula_units_Z             2 
_cell_measurement_temperature     296(2) 
_cell_measurement_reflns_used     41 
_cell_measurement_theta_min       15 
_cell_measurement_theta_max       15 
 
_exptl_crystal_description        block 
_exptl_crystal_colour             colourless 
_exptl_crystal_size_max           0.40 
_exptl_crystal_size_mid           0.30 
_exptl_crystal_size_min           0.20 
_exptl_crystal_density_meas       ? 
_exptl_crystal_density_diffrn     1.094 
_exptl_crystal_density_method     'not measured' 
_exptl_crystal_F_000              524 
_exptl_absorpt_coefficient_mu     0.062 
_exptl_absorpt_correction_type    multi-scan 
_exptl_absorpt_correction_T_min   0.6374  
_exptl_absorpt_correction_T_max   0.7456
_exptl_absorpt_process_details    ? 
 
_exptl_special_details 
; 
 ? 
; 
 
_diffrn_ambient_temperature       296(2) 
_diffrn_radiation_wavelength      0.71073 
_diffrn_radiation_type            MoK\a 
_diffrn_radiation_source          'fine-focus sealed tube' 
_diffrn_radiation_monochromator   graphite 
_diffrn_measurement_device_type   'BRUKER KAPPA APEXII DUO DIFFRACTOMETER'
_diffrn_measurement_method        'PHI & OMEGA SCAN'
_diffrn_detector_area_resol_mean  ? 
_diffrn_reflns_number             23605 
_diffrn_reflns_av_R_equivalents   0.0800 
_diffrn_reflns_av_sigmaI/netI     0.1007 
_diffrn_reflns_limit_h_min        -12 
_diffrn_reflns_limit_h_max        11 
_diffrn_reflns_limit_k_min        -9 
_diffrn_reflns_limit_k_max        12 
_diffrn_reflns_limit_l_min        -22 
_diffrn_reflns_limit_l_max        22 
_diffrn_reflns_theta_min          2.20 
_diffrn_reflns_theta_max          27.68 
_reflns_number_total              6800 
_reflns_number_gt                 2127 
_reflns_threshold_expression      >2sigma(I) 
 
_computing_data_collection        'BRUKER KAPPA APEXII DUO DIFFRACTOMETER' 
_computing_cell_refinement        'BRUKER KAPPA APEXII DUO DIFFRACTOMETER'
_computing_data_reduction         'BRUKER KAPPA APEXII DUO DIFFRACTOMETER' 
_computing_structure_solution     'SHELXS-97 (Sheldrick, 2008)' 
_computing_structure_refinement   'SHELXL-97 (Sheldrick, 2008)' 
_computing_molecular_graphics     'SIEMENS SHELXTL' 
_computing_publication_material   'SIEMENS SHELXTL'  
 
_refine_special_details 
; 
 Refinement of F^2^ against ALL reflections.  The weighted R-factor wR and 
 goodness of fit S are based on F^2^, conventional R-factors R are based 
 on F, with F set to zero for negative F^2^. The threshold expression of 
 F^2^ > 2sigma(F^2^) is used only for calculating R-factors(gt) etc. and is 
 not relevant to the choice of reflections for refinement.  R-factors based 
 on F^2^ are statistically about twice as large as those based on F, and R- 
 factors based on ALL data will be even larger. 
; 
 
_refine_ls_structure_factor_coef  Fsqd  
_refine_ls_matrix_type            full 
_refine_ls_weighting_scheme       calc  
_refine_ls_weighting_details 
 'calc w=1/[\s^2^(Fo^2^)+(0.2000P)^2^+0.0000P] where P=(Fo^2^+2Fc^2^)/3' 
_atom_sites_solution_primary      direct 
_atom_sites_solution_secondary    difmap 
_atom_sites_solution_hydrogens    geom 
_refine_ls_hydrogen_treatment     riding 
_refine_ls_extinction_method      SHELXL 
_refine_ls_extinction_coef        0.019(8) 
_refine_ls_extinction_expression 
 'Fc^*^=kFc[1+0.001xFc^2^\l^3^/sin(2\q)]^-1/4^' 
_refine_ls_number_reflns          6800 
_refine_ls_number_parameters      347 
_refine_ls_number_restraints      0 
_refine_ls_R_factor_all           0.2579 
_refine_ls_R_factor_gt            0.1146 
_refine_ls_wR_factor_ref          0.4289 
_refine_ls_wR_factor_gt           0.3374 
_refine_ls_goodness_of_fit_ref    1.124 
_refine_ls_restrained_S_all       1.124 
_refine_ls_shift/su_max           0.000 
_refine_ls_shift/su_mean          0.000 
 
loop_ 
 _atom_site_label 
 _atom_site_type_symbol 
 _atom_site_fract_x 
 _atom_site_fract_y 
 _atom_site_fract_z 
 _atom_site_U_iso_or_equiv 
 _atom_site_adp_type 
 _atom_site_occupancy 
 _atom_site_symmetry_multiplicity 
 _atom_site_calc_flag 
 _atom_site_refinement_flags 
 _atom_site_disorder_assembly 
 _atom_site_disorder_group 
N1 N 0.8071(4) 0.7404(4) 0.4316(2) 0.0735(11) Uani 1 1 d . . . 
N2 N 0.8009(4) 0.8297(4) 0.2991(2) 0.0728(11) Uani 1 1 d . . . 
C7 C 0.2547(7) 0.4543(6) 0.1599(3) 0.0996(18) Uani 1 1 d . . . 
C11 C 0.3302(8) 0.4969(7) 0.0933(4) 0.130(2) Uani 1 1 d . . . 
H11A H 0.4081 0.4422 0.0855 0.156 Uiso 1 1 calc R . . 
H11B H 0.3726 0.5984 0.1106 0.156 Uiso 1 1 calc R . . 
C12 C 0.2278(10) 0.4703(10) 0.0119(4) 0.150(3) Uani 1 1 d . . . 
H12A H 0.1572 0.5343 0.0183 0.180 Uiso 1 1 calc R . . 
H12B H 0.2832 0.4951 -0.0285 0.180 Uiso 1 1 calc R . . 
C13 C 0.1491(13) 0.3179(10) -0.0193(5) 0.206(5) Uani 1 1 d . . . 
H13A H 0.0616 0.3132 0.0045 0.248 Uiso 1 1 calc R . . 
H13B H 0.1186 0.3054 -0.0773 0.248 Uiso 1 1 calc R . . 
C14 C 0.2059(9) 0.1978(8) -0.0104(3) 0.149(3) Uani 1 1 d . . . 
H14A H 0.2927 0.2005 -0.0348 0.179 Uiso 1 1 calc R . . 
H14B H 0.1375 0.1150 -0.0434 0.179 Uiso 1 1 calc R . . 
C15 C 0.2464(8) 0.1655(7) 0.0744(3) 0.123(2) Uani 1 1 d . . . 
H15A H 0.1797 0.0766 0.0715 0.148 Uiso 1 1 calc R . . 
C16 C 0.6576(9) 0.1916(10) 0.0913(5) 0.160(3) Uani 1 1 d . . . 
H16A H 0.7194 0.2551 0.0692 0.240 Uiso 1 1 calc R . . 
H16B H 0.6689 0.0937 0.0702 0.240 Uiso 1 1 calc R . . 
H16C H 0.6832 0.2158 0.1496 0.240 Uiso 1 1 calc R . . 
C17 C 0.3378(10) -0.0830(8) 0.1509(5) 0.170(4) Uani 1 1 d . . . 
H17A H 0.3910 -0.1418 0.1784 0.255 Uiso 1 1 calc R . . 
H17B H 0.2794 -0.1422 0.1016 0.255 Uiso 1 1 calc R . . 
H17C H 0.2766 -0.0382 0.1857 0.255 Uiso 1 1 calc R . . 
C21 C 0.9476(7) 0.7280(8) 0.4745(3) 0.127(2) Uani 1 1 d . . . 
H21A H 1.0156 0.8140 0.4789 0.190 Uiso 1 1 calc R . . 
H21B H 0.9816 0.6462 0.4448 0.190 Uiso 1 1 calc R . . 
H21C H 0.9379 0.7156 0.5280 0.190 Uiso 1 1 calc R . . 
C22 C 0.6961(8) 0.6107(6) 0.4221(4) 0.128(2) Uani 1 1 d . . . 
H22A H 0.6058 0.6247 0.3944 0.191 Uiso 1 1 calc R . . 
H22B H 0.6841 0.5957 0.4748 0.191 Uiso 1 1 calc R . . 
H22C H 0.7265 0.5280 0.3909 0.191 Uiso 1 1 calc R . . 
C23 C 0.7583(5) 0.8709(5) 0.4696(3) 0.0696(13) Uani 1 1 d . . . 
C24 C 0.7389(5) 0.8976(6) 0.5494(3) 0.0863(15) Uani 1 1 d . . . 
H24A H 0.7584 0.8310 0.5799 0.104 Uiso 1 1 calc R . . 
C25 C 0.6912(6) 1.0208(7) 0.5853(3) 0.0990(18) Uani 1 1 d . . . 
H25A H 0.6791 1.0368 0.6395 0.119 Uiso 1 1 calc R . . 
C26 C 0.6624(5) 1.1169(6) 0.5427(4) 0.0983(18) Uani 1 1 d . . . 
H26A H 0.6340 1.2011 0.5689 0.118 Uiso 1 1 calc R . . 
C27 C 0.6732(5) 1.0965(5) 0.4582(3) 0.0810(14) Uani 1 1 d . . . 
C28 C 0.6357(6) 1.1920(6) 0.4119(5) 0.1056(19) Uani 1 1 d . . . 
H28A H 0.6004 1.2730 0.4366 0.127 Uiso 1 1 calc R . . 
C29 C 0.6478(7) 1.1732(7) 0.3347(5) 0.120(2) Uani 1 1 d . . . 
H29A H 0.6229 1.2408 0.3061 0.144 Uiso 1 1 calc R . . 
C30 C 0.6989(6) 1.0499(6) 0.2953(4) 0.1030(18) Uani 1 1 d . . . 
H30A H 0.7054 1.0353 0.2403 0.124 Uiso 1 1 calc R . . 
C31 C 0.7390(5) 0.9518(5) 0.3378(3) 0.0725(13) Uani 1 1 d . . . 
C32 C 0.7242(4) 0.9700(5) 0.4207(3) 0.0669(12) Uani 1 1 d . . . 
C33 C 0.7039(7) 0.7322(6) 0.2281(3) 0.115(2) Uani 1 1 d . . . 
H33A H 0.6120 0.7040 0.2430 0.173 Uiso 1 1 calc R . . 
H33B H 0.7458 0.6480 0.2101 0.173 Uiso 1 1 calc R . . 
H33C H 0.6909 0.7811 0.1848 0.173 Uiso 1 1 calc R . . 
C34 C 0.9448(6) 0.8748(7) 0.2790(4) 0.111(2) Uani 1 1 d . . . 
H34A H 1.0059 0.9371 0.3265 0.166 Uiso 1 1 calc R . . 
H34B H 0.9343 0.9255 0.2364 0.166 Uiso 1 1 calc R . . 
H34C H 0.9874 0.7912 0.2611 0.166 Uiso 1 1 calc R . . 
O1 O 0.5061(7) 0.2072(5) 0.0684(3) 0.1326(16) Uani 1 1 d . . . 
O2 O 0.4385(6) 0.0281(5) 0.1313(3) 0.1477(19) Uani 1 1 d . . . 
B1 B 0.2778(8) 0.4391(8) 0.3174(4) 0.103(2) Uani 1 1 d . . . 
H1 H 0.3404 0.4584 0.3790 0.123 Uiso 1 1 calc R . . 
B2 B 0.2995(9) 0.5583(7) 0.2571(4) 0.102(2) Uani 1 1 d . . . 
H2 H 0.3797 0.6582 0.2779 0.123 Uiso 1 1 calc R . . 
B3 B 0.3526(8) 0.3937(7) 0.2324(3) 0.0895(19) Uani 1 1 d . . . 
H3 H 0.4677 0.3843 0.2367 0.107 Uiso 1 1 calc R . . 
B4 B 0.2270(8) 0.2638(7) 0.2514(4) 0.098(2) Uani 1 1 d . . . 
H4 H 0.2634 0.1676 0.2667 0.118 Uiso 1 1 calc R . . 
B5 B 0.0959(9) 0.3529(9) 0.2934(4) 0.118(3) Uani 1 1 d . . . 
H5 H 0.0440 0.3141 0.3405 0.142 Uiso 1 1 calc R . . 
B6 B 0.1401(8) 0.5430(7) 0.2937(4) 0.098(2) Uani 1 1 d . . . 
H6 H 0.1167 0.6350 0.3378 0.117 Uiso 1 1 calc R . . 
B8 B 0.2071(8) 0.2839(7) 0.1526(4) 0.099(2) Uani 1 1 d . . . 
B9 B 0.0459(9) 0.2470(8) 0.1996(5) 0.117(3) Uani 1 1 d . . . 
H9 H -0.0417 0.1600 0.1648 0.140 Uiso 1 1 calc R . . 
B10 B -0.0042(10) 0.4316(9) 0.2310(6) 0.131(3) Uani 1 1 d . . . 
H10 H -0.1184 0.4397 0.2139 0.158 Uiso 1 1 calc R . . 
B11 B 0.1318(10) 0.5443(9) 0.1934(5) 0.114(3) Uani 1 1 d . . . 
H11 H 0.0833 0.5968 0.1477 0.136 Uiso 1 1 calc R . . 
B12 B 0.3959(10) 0.1248(7) 0.0931(4) 0.096(2) Uani 1 1 d . . . 
H8 H 0.047(5) 0.229(5) 0.131(3) 0.087(13) Uiso 1 1 d . . . 
H2A H 0.822(5) 0.775(5) 0.348(3) 0.097(15) Uiso 1 1 d . . . 
H10A H 0.024(5) 0.469(5) 0.172(3) 0.069(13) Uiso 1 1 d . . . 
 
loop_ 
 _atom_site_aniso_label 
 _atom_site_aniso_U_11 
 _atom_site_aniso_U_22 
 _atom_site_aniso_U_33 
 _atom_site_aniso_U_23 
 _atom_site_aniso_U_13 
 _atom_site_aniso_U_12 
N1 0.088(3) 0.074(3) 0.069(2) 0.0264(19) 0.020(2) 0.029(2) 
N2 0.085(3) 0.079(3) 0.064(2) 0.026(2) 0.017(2) 0.028(2) 
C7 0.123(5) 0.109(4) 0.086(4) 0.043(3) 0.032(3) 0.044(4) 
C11 0.159(6) 0.127(5) 0.132(6) 0.064(4) 0.043(5) 0.054(5) 
C12 0.211(8) 0.160(7) 0.105(5) 0.063(5) 0.029(5) 0.073(7) 
C13 0.338(15) 0.145(8) 0.121(6) 0.041(6) -0.050(7) 0.064(9) 
C14 0.242(8) 0.125(5) 0.079(4) 0.010(4) -0.022(4) 0.103(6) 
C15 0.185(7) 0.101(4) 0.082(4) 0.016(3) -0.008(4) 0.062(4) 
C16 0.149(7) 0.184(8) 0.168(7) 0.044(6) 0.042(6) 0.085(6) 
C17 0.220(9) 0.102(5) 0.217(9) 0.089(6) 0.047(7) 0.040(6) 
C21 0.120(5) 0.190(7) 0.089(4) 0.033(4) 0.013(3) 0.093(5) 
C22 0.186(7) 0.076(4) 0.134(5) 0.038(4) 0.064(5) 0.014(4) 
C23 0.062(3) 0.082(3) 0.063(3) 0.014(2) 0.008(2) 0.013(2) 
C24 0.079(3) 0.110(4) 0.068(3) 0.017(3) 0.015(3) 0.018(3) 
C25 0.089(4) 0.123(5) 0.075(4) -0.001(4) 0.015(3) 0.025(4) 
C26 0.067(3) 0.089(4) 0.121(5) -0.020(4) 0.022(3) 0.015(3) 
C27 0.062(3) 0.075(3) 0.104(4) 0.011(3) 0.016(3) 0.015(3) 
C28 0.092(4) 0.078(4) 0.157(6) 0.033(4) 0.030(4) 0.034(3) 
C29 0.117(5) 0.094(5) 0.176(7) 0.070(5) 0.034(5) 0.047(4) 
C30 0.114(5) 0.107(4) 0.114(4) 0.060(4) 0.029(3) 0.044(4) 
C31 0.070(3) 0.071(3) 0.082(3) 0.030(3) 0.009(2) 0.017(3) 
C32 0.060(3) 0.063(3) 0.076(3) 0.014(2) 0.014(2) 0.008(2) 
C33 0.148(6) 0.112(4) 0.081(4) 0.018(3) 0.013(4) 0.021(4) 
C34 0.101(4) 0.118(5) 0.143(5) 0.058(4) 0.050(4) 0.045(4) 
O1 0.180(5) 0.122(3) 0.104(3) 0.022(3) 0.038(3) 0.051(3) 
O2 0.214(5) 0.117(4) 0.123(3) 0.025(3) 0.012(3) 0.090(4) 
B1 0.116(6) 0.121(5) 0.066(4) 0.015(4) 0.005(3) 0.023(5) 
B2 0.131(6) 0.083(4) 0.102(5) 0.014(4) 0.048(4) 0.033(4) 
B3 0.119(5) 0.095(4) 0.062(3) 0.024(3) 0.006(3) 0.044(4) 
B4 0.134(6) 0.080(4) 0.088(4) 0.030(3) 0.008(4) 0.038(4) 
B5 0.139(7) 0.128(6) 0.094(5) 0.043(5) 0.026(5) 0.014(5) 
B6 0.113(5) 0.088(4) 0.086(4) -0.005(3) 0.026(4) 0.031(4) 
B8 0.142(6) 0.082(4) 0.072(4) 0.022(3) -0.010(4) 0.032(4) 
B9 0.138(7) 0.102(5) 0.109(6) 0.031(4) 0.004(5) 0.020(5) 
B10 0.130(7) 0.110(6) 0.164(8) 0.035(6) 0.041(6) 0.037(5) 
B11 0.137(7) 0.121(6) 0.117(6) 0.047(5) 0.046(5) 0.081(6) 
B12 0.142(7) 0.079(4) 0.075(4) 0.019(3) 0.020(4) 0.044(5) 
 
_geom_special_details 
; 
 All esds (except the esd in the dihedral angle between two l.s. planes) 
 are estimated using the full covariance matrix.  The cell esds are taken 
 into account individually in the estimation of esds in distances, angles 
 and torsion angles; correlations between esds in cell parameters are only 
 used when they are defined by crystal symmetry.  An approximate (isotropic) 
 treatment of cell esds is used for estimating esds involving l.s. planes. 
; 
 
loop_ 
 _geom_bond_atom_site_label_1 
 _geom_bond_atom_site_label_2 
 _geom_bond_distance 
 _geom_bond_site_symmetry_2 
 _geom_bond_publ_flag 
N1 C23 1.449(6) . ? 
N1 C21 1.463(6) . ? 
N1 C22 1.484(7) . ? 
N2 C31 1.456(6) . ? 
N2 C33 1.474(7) . ? 
N2 C34 1.480(6) . ? 
C7 C11 1.520(8) . ? 
C7 B8 1.615(9) . ? 
C7 B11 1.633(9) . ? 
C7 B3 1.697(7) . ? 
C7 B2 1.708(9) . ? 
C11 C12 1.534(9) . ? 
C12 C13 1.501(10) . ? 
C13 C14 1.368(9) . ? 
C14 C15 1.553(7) . ? 
C15 B12 1.531(10) . ? 
C15 B8 1.676(8) . ? 
C16 O1 1.472(8) . ? 
C17 O2 1.459(9) . ? 
C23 C24 1.373(6) . ? 
C23 C32 1.436(6) . ? 
C24 C25 1.376(7) . ? 
C25 C26 1.327(8) . ? 
C26 C27 1.433(7) . ? 
C27 C28 1.386(7) . ? 
C27 C32 1.426(6) . ? 
C28 C29 1.312(8) . ? 
C29 C30 1.413(8) . ? 
C30 C31 1.371(6) . ? 
C31 C32 1.416(6) . ? 
O1 B12 1.391(8) . ? 
O2 B12 1.321(7) . ? 
B1 B3 1.697(9) . ? 
B1 B2 1.708(10) . ? 
B1 B5 1.761(11) . ? 
B1 B4 1.779(9) . ? 
B1 B6 1.802(10) . ? 
B2 B6 1.709(10) . ? 
B2 B3 1.712(9) . ? 
B2 B11 1.771(12) . ? 
B3 B4 1.720(10) . ? 
B3 B8 1.831(9) . ? 
B4 B8 1.727(8) . ? 
B4 B5 1.748(11) . ? 
B4 B9 1.790(11) . ? 
B5 B9 1.670(11) . ? 
B5 B10 1.696(12) . ? 
B5 B6 1.820(10) . ? 
B6 B10 1.697(12) . ? 
B6 B11 1.706(9) . ? 
B8 B9 1.845(11) . ? 
B9 B10 1.886(11) . ? 
B10 B11 1.841(13) . ? 
 
loop_ 
 _geom_angle_atom_site_label_1 
 _geom_angle_atom_site_label_2 
 _geom_angle_atom_site_label_3 
 _geom_angle 
 _geom_angle_site_symmetry_1 
 _geom_angle_site_symmetry_3 
 _geom_angle_publ_flag 
C23 N1 C21 111.5(4) . . ? 
C23 N1 C22 111.5(4) . . ? 
C21 N1 C22 112.6(5) . . ? 
C31 N2 C33 113.9(4) . . ? 
C31 N2 C34 112.3(4) . . ? 
C33 N2 C34 111.3(4) . . ? 
C11 C7 B8 117.0(5) . . ? 
C11 C7 B11 119.3(5) . . ? 
B8 C7 B11 110.8(6) . . ? 
C11 C7 B3 117.9(5) . . ? 
B8 C7 B3 67.1(4) . . ? 
B11 C7 B3 113.7(5) . . ? 
C11 C7 B2 119.7(6) . . ? 
B8 C7 B2 115.1(4) . . ? 
B11 C7 B2 64.0(5) . . ? 
B3 C7 B2 60.4(3) . . ? 
C7 C11 C12 112.8(6) . . ? 
C13 C12 C11 114.2(6) . . ? 
C14 C13 C12 125.0(9) . . ? 
C13 C14 C15 122.0(6) . . ? 
B12 C15 C14 116.5(6) . . ? 
B12 C15 B8 112.6(5) . . ? 
C14 C15 B8 114.9(5) . . ? 
C24 C23 C32 120.2(5) . . ? 
C24 C23 N1 121.3(4) . . ? 
C32 C23 N1 118.5(4) . . ? 
C23 C24 C25 121.3(5) . . ? 
C26 C25 C24 120.3(5) . . ? 
C25 C26 C27 122.8(5) . . ? 
C28 C27 C32 119.2(5) . . ? 
C28 C27 C26 123.4(6) . . ? 
C32 C27 C26 117.3(5) . . ? 
C29 C28 C27 122.9(6) . . ? 
C28 C29 C30 119.8(6) . . ? 
C31 C30 C29 120.2(6) . . ? 
C30 C31 C32 120.4(5) . . ? 
C30 C31 N2 120.6(5) . . ? 
C32 C31 N2 119.0(4) . . ? 
C31 C32 C27 117.4(4) . . ? 
C31 C32 C23 124.6(4) . . ? 
C27 C32 C23 118.0(4) . . ? 
B12 O1 C16 120.0(6) . . ? 
B12 O2 C17 123.0(7) . . ? 
B3 B1 B2 60.4(4) . . ? 
B3 B1 B5 107.1(5) . . ? 
B2 B1 B5 107.5(5) . . ? 
B3 B1 B4 59.3(4) . . ? 
B2 B1 B4 107.0(5) . . ? 
B5 B1 B4 59.2(4) . . ? 
B3 B1 B6 106.9(4) . . ? 
B2 B1 B6 58.2(4) . . ? 
B5 B1 B6 61.4(4) . . ? 
B4 B1 B6 107.6(5) . . ? 
C7 B2 B1 104.6(5) . . ? 
C7 B2 B6 103.4(5) . . ? 
B1 B2 B6 63.7(4) . . ? 
C7 B2 B3 59.5(3) . . ? 
B1 B2 B3 59.5(4) . . ? 
B6 B2 B3 110.6(5) . . ? 
C7 B2 B11 55.9(4) . . ? 
B1 B2 B11 108.0(6) . . ? 
B6 B2 B11 58.7(4) . . ? 
B3 B2 B11 106.4(5) . . ? 
C7 B3 B1 105.6(5) . . ? 
C7 B3 B2 60.1(4) . . ? 
B1 B3 B2 60.1(4) . . ? 
C7 B3 B4 102.3(5) . . ? 
B1 B3 B4 62.7(4) . . ? 
B2 B3 B4 109.6(5) . . ? 
C7 B3 B8 54.3(3) . . ? 
B1 B3 B8 106.6(5) . . ? 
B2 B3 B8 104.6(5) . . ? 
B4 B3 B8 58.1(4) . . ? 
B3 B4 B8 64.2(4) . . ? 
B3 B4 B5 106.7(5) . . ? 
B8 B4 B5 104.1(5) . . ? 
B3 B4 B1 58.0(4) . . ? 
B8 B4 B1 107.6(5) . . ? 
B5 B4 B1 59.9(4) . . ? 
B3 B4 B9 115.9(4) . . ? 
B8 B4 B9 63.3(4) . . ? 
B5 B4 B9 56.3(4) . . ? 
B1 B4 B9 108.5(5) . . ? 
B9 B5 B10 68.1(5) . . ? 
B9 B5 B4 63.1(5) . . ? 
B10 B5 B4 115.9(6) . . ? 
B9 B5 B1 115.2(6) . . ? 
B10 B5 B1 111.4(6) . . ? 
B4 B5 B1 60.9(4) . . ? 
B9 B5 B6 112.8(5) . . ? 
B10 B5 B6 57.6(4) . . ? 
B4 B5 B6 108.2(5) . . ? 
B1 B5 B6 60.4(4) . . ? 
B10 B6 B11 65.5(5) . . ? 
B10 B6 B2 116.9(5) . . ? 
B11 B6 B2 62.5(5) . . ? 
B10 B6 B1 109.3(5) . . ? 
B11 B6 B1 106.7(4) . . ? 
B2 B6 B1 58.1(4) . . ? 
B10 B6 B5 57.5(4) . . ? 
B11 B6 B5 104.3(5) . . ? 
B2 B6 B5 104.8(5) . . ? 
B1 B6 B5 58.2(4) . . ? 
C7 B8 C15 118.9(5) . . ? 
C7 B8 B4 105.5(5) . . ? 
C15 B8 B4 123.9(4) . . ? 
C7 B8 B3 58.6(3) . . ? 
C15 B8 B3 120.0(5) . . ? 
B4 B8 B3 57.7(3) . . ? 
C7 B8 B9 111.7(5) . . ? 
C15 B8 B9 122.7(6) . . ? 
B4 B8 B9 60.0(4) . . ? 
B3 B8 B9 108.0(5) . . ? 
B5 B9 B4 60.6(5) . . ? 
B5 B9 B8 102.3(6) . . ? 
B4 B9 B8 56.7(4) . . ? 
B5 B9 B10 56.6(5) . . ? 
B4 B9 B10 105.1(6) . . ? 
B8 B9 B10 102.7(5) . . ? 
B5 B10 B6 64.9(5) . . ? 
B5 B10 B11 103.8(6) . . ? 
B6 B10 B11 57.5(5) . . ? 
B5 B10 B9 55.3(4) . . ? 
B6 B10 B9 108.4(6) . . ? 
B11 B10 B9 102.0(5) . . ? 
C7 B11 B6 106.9(5) . . ? 
C7 B11 B2 60.1(4) . . ? 
B6 B11 B2 58.8(4) . . ? 
C7 B11 B10 111.8(5) . . ? 
B6 B11 B10 57.0(4) . . ? 
B2 B11 B10 106.9(5) . . ? 
O2 B12 O1 114.7(7) . . ? 
O2 B12 C15 130.8(8) . . ? 
O1 B12 C15 114.4(6) . . ? 
 
_diffrn_measured_fraction_theta_max    0.978 
_diffrn_reflns_theta_full              27.68 
_diffrn_measured_fraction_theta_full   0.978 
_refine_diff_density_max    0.583 
_refine_diff_density_min   -0.281 
_refine_diff_density_rms    0.063 
#===END


data_[7][PSH] 
 
_audit_creation_method            SHELXL-97 
_chemical_name_systematic 
; 
 ? 
; 
_chemical_name_common             ? 
_chemical_melting_point           ? 
_chemical_formula_moiety          ? 
_chemical_formula_sum 
 'C20 H40 B10 N2 O' 
_chemical_formula_weight          432.64 
 
loop_ 
 _atom_type_symbol 
 _atom_type_description 
 _atom_type_scat_dispersion_real 
 _atom_type_scat_dispersion_imag 
 _atom_type_scat_source 
 'C'  'C'   0.0033   0.0016 
 'International Tables Vol C Tables 4.2.6.8 and 6.1.1.4' 
 'H'  'H'   0.0000   0.0000 
 'International Tables Vol C Tables 4.2.6.8 and 6.1.1.4' 
 'B'  'B'   0.0013   0.0007 
 'International Tables Vol C Tables 4.2.6.8 and 6.1.1.4' 
 'N'  'N'   0.0061   0.0033 
 'International Tables Vol C Tables 4.2.6.8 and 6.1.1.4' 
 'O'  'O'   0.0106   0.0060 
 'International Tables Vol C Tables 4.2.6.8 and 6.1.1.4' 
 
_symmetry_cell_setting            Monoclinic 
_symmetry_space_group_name_H-M    P2(1)/c 
 
loop_ 
 _symmetry_equiv_pos_as_xyz 
 'x, y, z' 
 '-x, y+1/2, -z+1/2' 
 '-x, -y, -z' 
 'x, -y-1/2, z-1/2' 
 
_cell_length_a                    13.5073(5) 
_cell_length_b                    12.4931(5) 
_cell_length_c                    15.3521(6) 
_cell_angle_alpha                 90.00 
_cell_angle_beta                  90.3520(10) 
_cell_angle_gamma                 90.00 
_cell_volume                      2590.59(17) 
_cell_formula_units_Z             4 
_cell_measurement_temperature     296(2) 
_cell_measurement_reflns_used     749 
_cell_measurement_theta_min       15 
_cell_measurement_theta_max       15 
 
_exptl_crystal_description        block 
_exptl_crystal_colour             colourless 
_exptl_crystal_size_max           0.50 
_exptl_crystal_size_mid           0.40 
_exptl_crystal_size_min           0.30 
_exptl_crystal_density_meas       ? 
_exptl_crystal_density_diffrn     1.109 
_exptl_crystal_density_method     'not measured' 
_exptl_crystal_F_000              928 
_exptl_absorpt_coefficient_mu     0.061 
_exptl_absorpt_correction_type    multi-scan 
_exptl_absorpt_correction_T_min   0.6642  
_exptl_absorpt_correction_T_max   0.7456
_exptl_absorpt_process_details    ? 
 
_exptl_special_details 
; 
 ? 
; 
 
_diffrn_ambient_temperature       296(2) 
_diffrn_radiation_wavelength      0.71073 
_diffrn_radiation_type            MoK\a 
_diffrn_radiation_source          'fine-focus sealed tube' 
_diffrn_radiation_monochromator   graphite 
_diffrn_measurement_device_type   'BRUKER KAPPA APEXII DUO DIFFRACTOMETER' 
_diffrn_measurement_method        'PHI & OMEGA SCAN' 
_diffrn_detector_area_resol_mean  ? 
_diffrn_reflns_number             22155 
_diffrn_reflns_av_R_equivalents   0.0371 
_diffrn_reflns_av_sigmaI/netI     0.0287 
_diffrn_reflns_limit_h_min        -16 
_diffrn_reflns_limit_h_max        15 
_diffrn_reflns_limit_k_min        -14 
_diffrn_reflns_limit_k_max        8 
_diffrn_reflns_limit_l_min        -17 
_diffrn_reflns_limit_l_max        18 
_diffrn_reflns_theta_min          2.10 
_diffrn_reflns_theta_max          25.25 
_reflns_number_total              4680 
_reflns_number_gt                 3547 
_reflns_threshold_expression      >2sigma(I) 
 
_computing_data_collection        'BRUKER KAPPA APEXII DUO DIFFRACTOMETER'  
_computing_cell_refinement        'BRUKER KAPPA APEXII DUO DIFFRACTOMETER' 
_computing_data_reduction         'BRUKER KAPPA APEXII DUO DIFFRACTOMETER'  
_computing_structure_solution     'SHELXS-97 (Sheldrick, 2008)' 
_computing_structure_refinement   'SHELXL-97 (Sheldrick, 2008)' 
_computing_molecular_graphics     'SIEMENS SHELXTL' 
_computing_publication_material   'SIEMENS SHELXTL' 
 
_refine_special_details 
; 
 Refinement of F^2^ against ALL reflections.  The weighted R-factor wR and 
 goodness of fit S are based on F^2^, conventional R-factors R are based 
 on F, with F set to zero for negative F^2^. The threshold expression of 
 F^2^ > 2sigma(F^2^) is used only for calculating R-factors(gt) etc. and is 
 not relevant to the choice of reflections for refinement.  R-factors based 
 on F^2^ are statistically about twice as large as those based on F, and R- 
 factors based on ALL data will be even larger. 
; 
 
_refine_ls_structure_factor_coef  Fsqd  
_refine_ls_matrix_type            full 
_refine_ls_weighting_scheme       calc  
_refine_ls_weighting_details 
 'calc w=1/[\s^2^(Fo^2^)+(0.0961P)^2^+1.1851P] where P=(Fo^2^+2Fc^2^)/3' 
_atom_sites_solution_primary      direct 
_atom_sites_solution_secondary    difmap 
_atom_sites_solution_hydrogens    geom 
_refine_ls_hydrogen_treatment     riding 
_refine_ls_extinction_method      none 
_refine_ls_extinction_coef        ? 
_refine_ls_number_reflns          4680 
_refine_ls_number_parameters      310 
_refine_ls_number_restraints      0 
_refine_ls_R_factor_all           0.0753 
_refine_ls_R_factor_gt            0.0562 
_refine_ls_wR_factor_ref          0.1830 
_refine_ls_wR_factor_gt           0.1608 
_refine_ls_goodness_of_fit_ref    1.041 
_refine_ls_restrained_S_all       1.041 
_refine_ls_shift/su_max           0.000 
_refine_ls_shift/su_mean          0.000 
 
loop_ 
 _atom_site_label 
 _atom_site_type_symbol 
 _atom_site_fract_x 
 _atom_site_fract_y 
 _atom_site_fract_z 
 _atom_site_U_iso_or_equiv 
 _atom_site_adp_type 
 _atom_site_occupancy 
 _atom_site_symmetry_multiplicity 
 _atom_site_calc_flag 
 _atom_site_refinement_flags 
 _atom_site_disorder_assembly 
 _atom_site_disorder_group 
O1 O 0.34498(14) 0.41577(15) 0.27829(14) 0.0761(6) Uani 1 1 d . . . 
H1A H 0.3444 0.3508 0.2856 0.114 Uiso 1 1 calc R . . 
N1 N 0.34848(12) 0.12578(13) 0.10407(10) 0.0369(4) Uani 1 1 d . . . 
N2 N 0.39064(12) 0.28858(13) 0.00695(11) 0.0396(4) Uani 1 1 d . . . 
B1 B 0.3596(2) 0.7899(2) 0.28972(17) 0.0511(6) Uani 1 1 d . . . 
H1 H 0.4294 0.8344 0.2832 0.061 Uiso 1 1 calc R . . 
B2 B 0.2789(2) 0.7682(2) 0.20097(16) 0.0472(6) Uani 1 1 d . . . 
H2 H 0.2955 0.7985 0.1354 0.057 Uiso 1 1 calc R . . 
B3 B 0.34307(18) 0.6610(2) 0.24553(15) 0.0442(6) Uani 1 1 d . . . 
H3 H 0.4026 0.6204 0.2098 0.053 Uiso 1 1 calc R . . 
B4 B 0.34874(18) 0.6767(2) 0.35968(16) 0.0453(6) Uani 1 1 d . . . 
H4 H 0.4119 0.6444 0.3969 0.054 Uiso 1 1 calc R . . 
B5 B 0.28804(19) 0.7994(2) 0.38507(16) 0.0454(6) Uani 1 1 d . . . 
H5 H 0.3129 0.8502 0.4395 0.054 Uiso 1 1 calc R . . 
B6 B 0.2425(2) 0.8551(2) 0.28594(17) 0.0497(6) Uani 1 1 d . . . 
H6 H 0.2350 0.9415 0.2738 0.060 Uiso 1 1 calc R . . 
B8 B 0.25592(17) 0.59110(18) 0.31237(14) 0.0380(5) Uani 1 1 d . . . 
B9 B 0.23035(19) 0.6773(2) 0.40937(16) 0.0429(6) Uani 1 1 d . . . 
H9 H 0.1947 0.6374 0.4648 0.052 Uiso 1 1 calc R . . 
B10 B 0.1612(2) 0.7949(2) 0.36187(17) 0.0459(6) Uani 1 1 d . . . 
H10 H 0.0907 0.8153 0.3933 0.055 Uiso 1 1 calc R . . 
B11 B 0.15586(19) 0.7607(2) 0.24315(17) 0.0476(6) Uani 1 1 d . . . 
H11 H 0.0792 0.7562 0.2187 0.057 Uiso 1 1 calc R . . 
C7 C 0.22113(15) 0.65092(16) 0.22140(12) 0.0378(5) Uani 1 1 d . . . 
C11 C 0.18960(17) 0.58382(18) 0.14228(14) 0.0492(6) Uani 1 1 d . . . 
H11A H 0.1676 0.6318 0.0964 0.059 Uiso 1 1 calc R . . 
H11B H 0.2469 0.5453 0.1209 0.059 Uiso 1 1 calc R . . 
C12 C 0.10758(18) 0.5037(2) 0.16049(17) 0.0569(6) Uani 1 1 d . . . 
H12A H 0.0597 0.5374 0.1985 0.068 Uiso 1 1 calc R . . 
H12B H 0.0740 0.4876 0.1060 0.068 Uiso 1 1 calc R . . 
C13 C 0.1404(2) 0.39915(19) 0.20182(18) 0.0616(7) Uani 1 1 d . . . 
H13A H 0.0871 0.3478 0.1945 0.074 Uiso 1 1 calc R . . 
H13B H 0.1966 0.3725 0.1693 0.074 Uiso 1 1 calc R . . 
C14 C 0.1691(2) 0.40099(19) 0.29744(18) 0.0592(6) Uani 1 1 d . . . 
H14A H 0.1780 0.3276 0.3165 0.071 Uiso 1 1 calc R . . 
H14B H 0.1139 0.4303 0.3298 0.071 Uiso 1 1 calc R . . 
C15 C 0.26142(18) 0.46333(18) 0.32277(14) 0.0501(6) Uani 1 1 d . . . 
H15A H 0.2722 0.4497 0.3850 0.060 Uiso 1 1 calc R . . 
C21 C 0.24454(14) 0.13603(16) 0.07639(12) 0.0366(4) Uani 1 1 d . . . 
C22 C 0.17607(17) 0.0643(2) 0.10427(16) 0.0542(6) Uani 1 1 d . . . 
H22A H 0.1954 0.0077 0.1398 0.065 Uiso 1 1 calc R . . 
C23 C 0.07648(18) 0.0753(2) 0.07983(18) 0.0632(7) Uani 1 1 d . . . 
H23A H 0.0302 0.0253 0.0985 0.076 Uiso 1 1 calc R . . 
C24 C 0.04752(17) 0.1582(2) 0.02910(16) 0.0545(6) Uani 1 1 d . . . 
H24A H -0.0190 0.1653 0.0142 0.065 Uiso 1 1 calc R . . 
C25 C 0.11606(15) 0.23391(17) -0.00154(14) 0.0426(5) Uani 1 1 d . . . 
C26 C 0.08561(18) 0.3204(2) -0.05452(17) 0.0550(6) Uani 1 1 d . . . 
H26A H 0.0190 0.3277 -0.0689 0.066 Uiso 1 1 calc R . . 
C27 C 0.15119(19) 0.3926(2) -0.08464(18) 0.0605(7) Uani 1 1 d . . . 
H27A H 0.1295 0.4495 -0.1189 0.073 Uiso 1 1 calc R . . 
C28 C 0.25184(18) 0.38199(18) -0.06440(16) 0.0527(6) Uani 1 1 d . . . 
H28A H 0.2967 0.4318 -0.0859 0.063 Uiso 1 1 calc R . . 
C29 C 0.28535(14) 0.29984(16) -0.01372(12) 0.0371(4) Uani 1 1 d . . . 
C30 C 0.21828(14) 0.22298(15) 0.02079(12) 0.0343(4) Uani 1 1 d . . . 
C31 C 0.39154(18) 0.02009(18) 0.08266(19) 0.0592(6) Uani 1 1 d . . . 
H31A H 0.3818 0.0055 0.0218 0.089 Uiso 1 1 calc R . . 
H31B H 0.3596 -0.0344 0.1165 0.089 Uiso 1 1 calc R . . 
H31C H 0.4611 0.0206 0.0958 0.089 Uiso 1 1 calc R . . 
C32 C 0.36202(18) 0.1516(2) 0.19822(14) 0.0531(6) Uani 1 1 d . . . 
H32A H 0.3335 0.2204 0.2102 0.080 Uiso 1 1 calc R . . 
H32B H 0.4314 0.1531 0.2121 0.080 Uiso 1 1 calc R . . 
H32C H 0.3299 0.0981 0.2329 0.080 Uiso 1 1 calc R . . 
C33 C 0.45114(19) 0.2663(3) -0.07095(16) 0.0674(7) Uani 1 1 d . . . 
H33A H 0.4244 0.2055 -0.1013 0.101 Uiso 1 1 calc R . . 
H33B H 0.5180 0.2513 -0.0534 0.101 Uiso 1 1 calc R . . 
H33C H 0.4503 0.3275 -0.1087 0.101 Uiso 1 1 calc R . . 
C34 C 0.42897(19) 0.3818(2) 0.05614(18) 0.0609(7) Uani 1 1 d . . . 
H34A H 0.3882 0.3941 0.1061 0.091 Uiso 1 1 calc R . . 
H34B H 0.4279 0.4440 0.0194 0.091 Uiso 1 1 calc R . . 
H34C H 0.4957 0.3678 0.0748 0.091 Uiso 1 1 calc R . . 
H8 H 0.1835(17) 0.6218(19) 0.3650(15) 0.053(6) Uiso 1 1 d . . . 
H10A H 0.1114(17) 0.7294(19) 0.3180(15) 0.056(7) Uiso 1 1 d . . . 
H1B H 0.386(2) 0.192(2) 0.0635(18) 0.075(8) Uiso 1 1 d . . . 
 
loop_ 
 _atom_site_aniso_label 
 _atom_site_aniso_U_11 
 _atom_site_aniso_U_22 
 _atom_site_aniso_U_33 
 _atom_site_aniso_U_23 
 _atom_site_aniso_U_13 
 _atom_site_aniso_U_12 
O1 0.0741(13) 0.0577(11) 0.0966(15) -0.0044(10) 0.0027(11) 0.0272(9) 
N1 0.0397(9) 0.0339(9) 0.0370(9) 0.0039(7) -0.0021(7) -0.0033(7) 
N2 0.0364(9) 0.0420(9) 0.0403(9) 0.0058(7) 0.0019(7) -0.0078(7) 
B1 0.0468(15) 0.0588(16) 0.0476(14) 0.0019(12) 0.0001(11) -0.0165(12) 
B2 0.0582(16) 0.0434(13) 0.0400(12) 0.0084(11) 0.0006(11) -0.0088(11) 
B3 0.0391(13) 0.0542(15) 0.0395(12) 0.0019(11) 0.0047(10) -0.0024(10) 
B4 0.0406(13) 0.0554(15) 0.0399(12) 0.0004(11) -0.0065(10) 0.0048(11) 
B5 0.0517(15) 0.0426(13) 0.0417(12) -0.0020(11) -0.0028(11) -0.0042(11) 
B6 0.0638(17) 0.0356(13) 0.0494(14) 0.0071(11) -0.0032(12) -0.0049(11) 
B8 0.0416(13) 0.0393(12) 0.0332(11) 0.0023(10) 0.0023(9) 0.0065(9) 
B9 0.0500(14) 0.0407(13) 0.0381(12) 0.0033(10) 0.0041(10) 0.0017(10) 
B10 0.0486(14) 0.0391(13) 0.0501(14) -0.0004(11) 0.0027(11) 0.0047(10) 
B11 0.0466(14) 0.0469(14) 0.0493(14) 0.0042(11) -0.0095(11) 0.0035(11) 
C7 0.0408(11) 0.0379(10) 0.0347(10) 0.0046(8) -0.0023(8) -0.0009(8) 
C11 0.0572(14) 0.0513(13) 0.0391(11) -0.0022(10) -0.0060(10) 0.0026(10) 
C12 0.0519(14) 0.0581(14) 0.0606(14) -0.0114(12) -0.0119(11) -0.0009(11) 
C13 0.0634(16) 0.0451(13) 0.0763(17) -0.0101(12) 0.0002(13) -0.0083(11) 
C14 0.0717(17) 0.0389(12) 0.0673(16) 0.0041(11) 0.0166(13) 0.0002(11) 
C15 0.0644(15) 0.0435(12) 0.0425(11) 0.0043(10) 0.0003(10) 0.0163(10) 
C21 0.0369(11) 0.0381(10) 0.0349(10) 0.0006(8) 0.0015(8) -0.0057(8) 
C22 0.0521(14) 0.0555(14) 0.0550(13) 0.0150(11) 0.0001(11) -0.0153(11) 
C23 0.0463(14) 0.0733(17) 0.0701(16) 0.0110(14) 0.0063(12) -0.0232(12) 
C24 0.0332(11) 0.0697(16) 0.0607(14) -0.0063(13) 0.0010(10) -0.0065(10) 
C25 0.0378(11) 0.0453(11) 0.0447(11) -0.0090(9) -0.0001(9) 0.0010(9) 
C26 0.0450(13) 0.0537(14) 0.0663(15) -0.0049(12) -0.0126(11) 0.0108(10) 
C27 0.0623(16) 0.0486(13) 0.0705(16) 0.0109(12) -0.0157(13) 0.0083(11) 
C28 0.0590(15) 0.0411(12) 0.0580(14) 0.0123(11) -0.0056(11) -0.0059(10) 
C29 0.0399(11) 0.0358(10) 0.0356(10) 0.0008(8) -0.0021(8) -0.0024(8) 
C30 0.0367(10) 0.0345(10) 0.0318(9) -0.0051(8) 0.0010(8) -0.0019(8) 
C31 0.0536(14) 0.0394(12) 0.0846(18) -0.0039(12) 0.0005(12) 0.0015(10) 
C32 0.0579(14) 0.0622(15) 0.0390(11) 0.0036(11) -0.0068(10) -0.0102(11) 
C33 0.0514(15) 0.097(2) 0.0540(14) 0.0069(14) 0.0140(12) 0.0029(14) 
C34 0.0580(15) 0.0508(14) 0.0737(17) 0.0013(12) -0.0131(13) -0.0172(11) 
 
_geom_special_details 
; 
 All esds (except the esd in the dihedral angle between two l.s. planes) 
 are estimated using the full covariance matrix.  The cell esds are taken 
 into account individually in the estimation of esds in distances, angles 
 and torsion angles; correlations between esds in cell parameters are only 
 used when they are defined by crystal symmetry.  An approximate (isotropic) 
 treatment of cell esds is used for estimating esds involving l.s. planes. 
; 
 
loop_ 
 _geom_bond_atom_site_label_1 
 _geom_bond_atom_site_label_2 
 _geom_bond_distance 
 _geom_bond_site_symmetry_2 
 _geom_bond_publ_flag 
O1 C15 1.450(3) . ? 
N1 C21 1.470(2) . ? 
N1 C31 1.481(3) . ? 
N1 C32 1.491(3) . ? 
N2 C29 1.462(3) . ? 
N2 C33 1.479(3) . ? 
N2 C34 1.480(3) . ? 
B1 B3 1.761(4) . ? 
B1 B2 1.761(4) . ? 
B1 B5 1.763(4) . ? 
B1 B6 1.781(4) . ? 
B1 B4 1.783(4) . ? 
B2 C7 1.690(3) . ? 
B2 B3 1.733(4) . ? 
B2 B6 1.770(4) . ? 
B2 B11 1.789(4) . ? 
B3 C7 1.691(3) . ? 
B3 B4 1.765(3) . ? 
B3 B8 1.793(3) . ? 
B4 B9 1.776(4) . ? 
B4 B5 1.783(4) . ? 
B4 B8 1.797(3) . ? 
B5 B10 1.749(4) . ? 
B5 B9 1.754(3) . ? 
B5 B6 1.780(3) . ? 
B6 B10 1.774(4) . ? 
B6 B11 1.784(4) . ? 
B8 C15 1.606(3) . ? 
B8 C7 1.650(3) . ? 
B8 B9 1.871(3) . ? 
B9 B10 1.885(3) . ? 
B10 B11 1.873(4) . ? 
B11 C7 1.665(3) . ? 
C7 C11 1.534(3) . ? 
C11 C12 1.520(3) . ? 
C12 C13 1.517(3) . ? 
C13 C14 1.516(4) . ? 
C14 C15 1.519(4) . ? 
C21 C22 1.358(3) . ? 
C21 C30 1.425(3) . ? 
C22 C23 1.401(3) . ? 
C23 C24 1.352(4) . ? 
C24 C25 1.407(3) . ? 
C25 C26 1.412(3) . ? 
C25 C30 1.427(3) . ? 
C26 C27 1.348(4) . ? 
C27 C28 1.399(3) . ? 
C28 C29 1.364(3) . ? 
C29 C30 1.424(3) . ? 
 
loop_ 
 _geom_angle_atom_site_label_1 
 _geom_angle_atom_site_label_2 
 _geom_angle_atom_site_label_3 
 _geom_angle 
 _geom_angle_site_symmetry_1 
 _geom_angle_site_symmetry_3 
 _geom_angle_publ_flag 
C21 N1 C31 112.92(16) . . ? 
C21 N1 C32 111.87(16) . . ? 
C31 N1 C32 111.25(18) . . ? 
C29 N2 C33 112.59(17) . . ? 
C29 N2 C34 111.83(17) . . ? 
C33 N2 C34 111.57(19) . . ? 
B3 B1 B2 58.97(14) . . ? 
B3 B1 B5 108.22(18) . . ? 
B2 B1 B5 108.22(18) . . ? 
B3 B1 B6 107.17(17) . . ? 
B2 B1 B6 59.95(15) . . ? 
B5 B1 B6 60.29(15) . . ? 
B3 B1 B4 59.72(14) . . ? 
B2 B1 B4 106.91(17) . . ? 
B5 B1 B4 60.38(14) . . ? 
B6 B1 B4 107.84(18) . . ? 
C7 B2 B3 59.18(13) . . ? 
C7 B2 B1 105.92(17) . . ? 
B3 B2 B1 60.51(15) . . ? 
C7 B2 B6 105.34(17) . . ? 
B3 B2 B6 108.90(17) . . ? 
B1 B2 B6 60.57(15) . . ? 
C7 B2 B11 57.11(13) . . ? 
B3 B2 B11 106.28(17) . . ? 
B1 B2 B11 107.46(18) . . ? 
B6 B2 B11 60.15(15) . . ? 
C7 B3 B2 59.12(13) . . ? 
C7 B3 B1 105.88(18) . . ? 
B2 B3 B1 60.52(15) . . ? 
C7 B3 B4 105.20(16) . . ? 
B2 B3 B4 108.96(18) . . ? 
B1 B3 B4 60.75(15) . . ? 
C7 B3 B8 56.43(12) . . ? 
B2 B3 B8 105.87(17) . . ? 
B1 B3 B8 107.88(17) . . ? 
B4 B3 B8 60.68(14) . . ? 
B3 B4 B9 113.17(17) . . ? 
B3 B4 B1 59.53(15) . . ? 
B9 B4 B1 109.45(18) . . ? 
B3 B4 B5 107.17(17) . . ? 
B9 B4 B5 59.07(14) . . ? 
B1 B4 B5 59.26(15) . . ? 
B3 B4 B8 60.45(13) . . ? 
B9 B4 B8 63.16(14) . . ? 
B1 B4 B8 106.76(16) . . ? 
B5 B4 B8 106.22(16) . . ? 
B10 B5 B9 65.11(14) . . ? 
B10 B5 B1 111.73(18) . . ? 
B9 B5 B1 111.37(18) . . ? 
B10 B5 B6 60.34(15) . . ? 
B9 B5 B6 111.72(17) . . ? 
B1 B5 B6 60.34(15) . . ? 
B10 B5 B4 112.25(17) . . ? 
B9 B5 B4 60.26(14) . . ? 
B1 B5 B4 60.35(15) . . ? 
B6 B5 B4 107.85(17) . . ? 
B2 B6 B10 113.57(18) . . ? 
B2 B6 B5 107.10(18) . . ? 
B10 B6 B5 58.96(14) . . ? 
B2 B6 B1 59.47(15) . . ? 
B10 B6 B1 109.74(18) . . ? 
B5 B6 B1 59.37(15) . . ? 
B2 B6 B11 60.48(15) . . ? 
B10 B6 B11 63.54(15) . . ? 
B5 B6 B11 106.20(17) . . ? 
B1 B6 B11 106.86(18) . . ? 
C15 B8 C7 123.17(18) . . ? 
C15 B8 B3 120.72(18) . . ? 
C7 B8 B3 58.64(13) . . ? 
C15 B8 B4 121.28(18) . . ? 
C7 B8 B4 105.49(16) . . ? 
B3 B8 B4 58.87(13) . . ? 
C15 B8 B9 120.09(17) . . ? 
C7 B8 B9 111.10(16) . . ? 
B3 B8 B9 107.46(16) . . ? 
B4 B8 B9 57.86(13) . . ? 
B5 B9 B4 60.67(15) . . ? 
B5 B9 B8 104.29(16) . . ? 
B4 B9 B8 58.98(13) . . ? 
B5 B9 B10 57.30(14) . . ? 
B4 B9 B10 106.41(17) . . ? 
B8 B9 B10 103.53(15) . . ? 
B5 B10 B6 60.70(15) . . ? 
B5 B10 B11 103.74(17) . . ? 
B6 B10 B11 58.49(14) . . ? 
B5 B10 B9 57.60(14) . . ? 
B6 B10 B9 106.13(18) . . ? 
B11 B10 B9 102.41(16) . . ? 
C7 B11 B6 105.77(17) . . ? 
C7 B11 B2 58.43(14) . . ? 
B6 B11 B2 59.38(15) . . ? 
C7 B11 B10 111.44(17) . . ? 
B6 B11 B10 57.97(14) . . ? 
B2 B11 B10 108.06(17) . . ? 
C11 C7 B8 119.94(17) . . ? 
C11 C7 B11 117.65(17) . . ? 
B8 C7 B11 110.59(16) . . ? 
C11 C7 B2 116.93(17) . . ? 
B8 C7 B2 114.86(16) . . ? 
B11 C7 B2 64.46(15) . . ? 
C11 C7 B3 118.66(18) . . ? 
B8 C7 B3 64.93(13) . . ? 
B11 C7 B3 114.26(17) . . ? 
B2 C7 B3 61.70(14) . . ? 
C12 C11 C7 114.40(19) . . ? 
C13 C12 C11 115.6(2) . . ? 
C14 C13 C12 117.7(2) . . ? 
C13 C14 C15 117.4(2) . . ? 
O1 C15 C14 108.02(19) . . ? 
O1 C15 B8 113.34(19) . . ? 
C14 C15 B8 116.55(19) . . ? 
C22 C21 C30 121.58(19) . . ? 
C22 C21 N1 120.16(18) . . ? 
C30 C21 N1 118.25(16) . . ? 
C21 C22 C23 120.4(2) . . ? 
C24 C23 C22 120.2(2) . . ? 
C23 C24 C25 121.3(2) . . ? 
C24 C25 C26 121.1(2) . . ? 
C24 C25 C30 119.5(2) . . ? 
C26 C25 C30 119.3(2) . . ? 
C27 C26 C25 121.3(2) . . ? 
C26 C27 C28 120.0(2) . . ? 
C29 C28 C27 121.1(2) . . ? 
C28 C29 C30 120.66(19) . . ? 
C28 C29 N2 121.02(18) . . ? 
C30 C29 N2 118.33(16) . . ? 
C29 C30 C21 125.45(17) . . ? 
C29 C30 C25 117.57(17) . . ? 
C21 C30 C25 116.98(17) . . ? 
 
_diffrn_measured_fraction_theta_max    0.999 
_diffrn_reflns_theta_full              25.25 
_diffrn_measured_fraction_theta_full   0.999 
_refine_diff_density_max    0.471 
_refine_diff_density_min   -0.355 
_refine_diff_density_rms    0.043 
#===END


data_[9][PPN]
 
_audit_creation_method            SHELXL-97 
_chemical_name_systematic 
; 
 ? 
; 
_chemical_name_common             ? 
_chemical_melting_point           ? 
_chemical_formula_moiety          ? 
_chemical_formula_sum 
 'C53 H64 B11 N O P2 S' 
_chemical_formula_weight          943.96 
 
loop_ 
 _atom_type_symbol 
 _atom_type_description 
 _atom_type_scat_dispersion_real 
 _atom_type_scat_dispersion_imag 
 _atom_type_scat_source 
 'C'  'C'   0.0033   0.0016 
 'International Tables Vol C Tables 4.2.6.8 and 6.1.1.4' 
 'H'  'H'   0.0000   0.0000 
 'International Tables Vol C Tables 4.2.6.8 and 6.1.1.4' 
 'B'  'B'   0.0013   0.0007 
 'International Tables Vol C Tables 4.2.6.8 and 6.1.1.4' 
 'N'  'N'   0.0061   0.0033 
 'International Tables Vol C Tables 4.2.6.8 and 6.1.1.4' 
 'O'  'O'   0.0106   0.0060 
 'International Tables Vol C Tables 4.2.6.8 and 6.1.1.4' 
 'P'  'P'   0.1023   0.0942 
 'International Tables Vol C Tables 4.2.6.8 and 6.1.1.4' 
 'S'  'S'   0.1246   0.1234 
 'International Tables Vol C Tables 4.2.6.8 and 6.1.1.4' 
 
_symmetry_cell_setting            Triclinic 
_symmetry_space_group_name_H-M    P-1 
 
loop_ 
 _symmetry_equiv_pos_as_xyz 
 'x, y, z' 
 '-x, -y, -z' 
 
_cell_length_a                    11.125(8) 
_cell_length_b                    14.248(11) 
_cell_length_c                    17.751(14) 
_cell_angle_alpha                 98.412(17) 
_cell_angle_beta                  104.365(14) 
_cell_angle_gamma                 98.182(15) 
_cell_volume                      2649(3) 
_cell_formula_units_Z             2 
_cell_measurement_temperature     296(2) 
_cell_measurement_reflns_used     202 
_cell_measurement_theta_min       15 
_cell_measurement_theta_max       15 
 
_exptl_crystal_description        block 
_exptl_crystal_colour             colourless 
_exptl_crystal_size_max           0.50 
_exptl_crystal_size_mid           0.40 
_exptl_crystal_size_min           0.20 
_exptl_crystal_density_meas       ? 
_exptl_crystal_density_diffrn     1.183 
_exptl_crystal_density_method     'not measured' 
_exptl_crystal_F_000              996 
_exptl_absorpt_coefficient_mu     0.161 
_exptl_absorpt_correction_type    multi-scan 
_exptl_absorpt_correction_T_min   0.6623  
_exptl_absorpt_correction_T_max   0.7456 
_exptl_absorpt_process_details    ? 
 
_exptl_special_details 
; 
 ? 
; 
 
_diffrn_ambient_temperature       296(2) 
_diffrn_radiation_wavelength      0.71073 
_diffrn_radiation_type            MoK\a 
_diffrn_radiation_source          'fine-focus sealed tube' 
_diffrn_radiation_monochromator   graphite 
_diffrn_measurement_device_type   'BRUKER KAPPA APEXII DUO DIFFRACTOMETER' 
_diffrn_measurement_method        'PHI & OMEGA SCAN' 
_diffrn_detector_area_resol_mean  ? 
_diffrn_reflns_number             31135 
_diffrn_reflns_av_R_equivalents   0.0374 
_diffrn_reflns_av_sigmaI/netI     0.0351 
_diffrn_reflns_limit_h_min        -13 
_diffrn_reflns_limit_h_max        5 
_diffrn_reflns_limit_k_min        -16 
_diffrn_reflns_limit_k_max        17 
_diffrn_reflns_limit_l_min        -20 
_diffrn_reflns_limit_l_max        21 
_diffrn_reflns_theta_min          1.21 
_diffrn_reflns_theta_max          25.25 
_reflns_number_total              9561 
_reflns_number_gt                 7362 
_reflns_threshold_expression      >2sigma(I) 
 
_computing_data_collection        'BRUKER KAPPA APEXII DUO DIFFRACTOMETER'  
_computing_cell_refinement        'BRUKER KAPPA APEXII DUO DIFFRACTOMETER'  
_computing_data_reduction         'BRUKER KAPPA APEXII DUO DIFFRACTOMETER'  
_computing_structure_solution     'SHELXS-97 (Sheldrick, 2008)' 
_computing_structure_refinement   'SHELXL-97 (Sheldrick, 2008)' 
_computing_molecular_graphics     'SIEMENS SHELXTL'
_computing_publication_material   'SIEMENS SHELXTL' 
 
_refine_special_details 
; 
 Refinement of F^2^ against ALL reflections.  The weighted R-factor wR and 
 goodness of fit S are based on F^2^, conventional R-factors R are based 
 on F, with F set to zero for negative F^2^. The threshold expression of 
 F^2^ > 2sigma(F^2^) is used only for calculating R-factors(gt) etc. and is 
 not relevant to the choice of reflections for refinement.  R-factors based 
 on F^2^ are statistically about twice as large as those based on F, and R- 
 factors based on ALL data will be even larger. 
; 
 
_refine_ls_structure_factor_coef  Fsqd  
_refine_ls_matrix_type            full 
_refine_ls_weighting_scheme       calc  
_refine_ls_weighting_details 
 'calc w=1/[\s^2^(Fo^2^)+(0.0873P)^2^+1.7280P] where P=(Fo^2^+2Fc^2^)/3' 
_atom_sites_solution_primary      direct 
_atom_sites_solution_secondary    difmap 
_atom_sites_solution_hydrogens    geom 
_refine_ls_hydrogen_treatment     riding
_refine_ls_extinction_method      none 
_refine_ls_extinction_coef        ? 
_refine_ls_number_reflns          9561 
_refine_ls_number_parameters      622 
_refine_ls_number_restraints      5 
_refine_ls_R_factor_all           0.0718 
_refine_ls_R_factor_gt            0.0528 
_refine_ls_wR_factor_ref          0.1699 
_refine_ls_wR_factor_gt           0.1466 
_refine_ls_goodness_of_fit_ref    1.022 
_refine_ls_restrained_S_all       1.042 
_refine_ls_shift/su_max           0.004 
_refine_ls_shift/su_mean          0.000 
 
loop_ 
 _atom_site_label 
 _atom_site_type_symbol 
 _atom_site_fract_x 
 _atom_site_fract_y 
 _atom_site_fract_z 
 _atom_site_U_iso_or_equiv 
 _atom_site_adp_type 
 _atom_site_occupancy 
 _atom_site_symmetry_multiplicity 
 _atom_site_calc_flag 
 _atom_site_refinement_flags 
 _atom_site_disorder_assembly 
 _atom_site_disorder_group 
S1 S 1.16721(8) 0.58763(5) 0.78821(5) 0.0585(2) Uani 1 1 d . . . 
O1 O 0.5526(5) 0.0879(4) 0.7686(3) 0.1625(17) Uani 1 1 d D . . 
N1 N 0.56110(19) 0.29955(15) 0.33765(12) 0.0409(5) Uani 1 1 d . . . 
P1 P 0.42310(6) 0.27227(4) 0.28009(4) 0.03672(17) Uani 1 1 d . . . 
P2 P 0.63704(6) 0.29284(4) 0.42362(4) 0.03539(17) Uani 1 1 d . . . 
C31 C 0.4287(2) 0.21198(18) 0.18529(15) 0.0420(6) Uani 1 1 d . . . 
C32 C 0.5420(3) 0.2079(2) 0.16949(17) 0.0548(7) Uani 1 1 d . . . 
H32A H 0.6168 0.2360 0.2081 0.066 Uiso 1 1 calc R . . 
C33 C 0.5453(4) 0.1620(3) 0.0958(2) 0.0722(9) Uani 1 1 d . . . 
H33A H 0.6225 0.1589 0.0850 0.087 Uiso 1 1 calc R . . 
C34 C 0.4359(4) 0.1214(3) 0.03916(19) 0.0746(10) Uani 1 1 d . . . 
H34A H 0.4384 0.0896 -0.0099 0.090 Uiso 1 1 calc R . . 
C35 C 0.3230(4) 0.1272(3) 0.05412(19) 0.0789(10) Uani 1 1 d . . . 
H35A H 0.2484 0.1004 0.0149 0.095 Uiso 1 1 calc R . . 
C36 C 0.3182(3) 0.1725(2) 0.12672(18) 0.0632(8) Uani 1 1 d . . . 
H36A H 0.2405 0.1765 0.1365 0.076 Uiso 1 1 calc R . . 
C41 C 0.3132(2) 0.19364(19) 0.31277(15) 0.0443(6) Uani 1 1 d . . . 
C42 C 0.3080(3) 0.0949(2) 0.2964(2) 0.0637(8) Uani 1 1 d . . . 
H42A H 0.3551 0.0694 0.2646 0.076 Uiso 1 1 calc R . . 
C43 C 0.2324(4) 0.0340(3) 0.3275(3) 0.0859(12) Uani 1 1 d . . . 
H43A H 0.2289 -0.0324 0.3166 0.103 Uiso 1 1 calc R . . 
C44 C 0.1629(4) 0.0713(3) 0.3741(2) 0.0849(12) Uani 1 1 d . . . 
H44A H 0.1115 0.0302 0.3943 0.102 Uiso 1 1 calc R . . 
C45 C 0.1688(3) 0.1679(3) 0.3910(2) 0.0726(9) Uani 1 1 d . . . 
H45A H 0.1221 0.1929 0.4232 0.087 Uiso 1 1 calc R . . 
C46 C 0.2437(3) 0.2296(2) 0.36063(18) 0.0551(7) Uani 1 1 d . . . 
H46A H 0.2471 0.2959 0.3726 0.066 Uiso 1 1 calc R . . 
C51 C 0.3624(2) 0.37932(18) 0.26275(15) 0.0405(5) Uani 1 1 d . . . 
C52 C 0.2346(2) 0.3785(2) 0.23475(18) 0.0530(7) Uani 1 1 d . . . 
H52A H 0.1764 0.3218 0.2267 0.064 Uiso 1 1 calc R . . 
C53 C 0.1942(3) 0.4621(2) 0.2189(2) 0.0614(8) Uani 1 1 d . . . 
H53A H 0.1082 0.4617 0.2006 0.074 Uiso 1 1 calc R . . 
C54 C 0.2788(3) 0.5457(2) 0.2298(2) 0.0639(8) Uani 1 1 d . . . 
H54A H 0.2502 0.6020 0.2197 0.077 Uiso 1 1 calc R . . 
C55 C 0.4056(3) 0.5467(2) 0.2554(2) 0.0772(11) Uani 1 1 d . . . 
H55A H 0.4632 0.6033 0.2616 0.093 Uiso 1 1 calc R . . 
C56 C 0.4473(3) 0.4637(2) 0.2721(2) 0.0635(9) Uani 1 1 d . . . 
H56A H 0.5335 0.4644 0.2898 0.076 Uiso 1 1 calc R . . 
C61 C 0.5421(2) 0.2683(2) 0.48942(15) 0.0487(6) Uani 1 1 d . . . 
C62 C 0.5214(4) 0.1788(3) 0.5099(2) 0.0778(10) Uani 1 1 d . . . 
H62A H 0.5614 0.1304 0.4921 0.093 Uiso 1 1 calc R . . 
C63 C 0.4415(5) 0.1607(5) 0.5568(3) 0.1205(19) Uani 1 1 d . . . 
H63A H 0.4287 0.1003 0.5705 0.145 Uiso 1 1 calc R . . 
C64 C 0.3827(5) 0.2284(6) 0.5824(3) 0.128(2) Uani 1 1 d . . . 
H64A H 0.3284 0.2151 0.6133 0.154 Uiso 1 1 calc R . . 
C65 C 0.4023(4) 0.3167(5) 0.5634(3) 0.1096(19) Uani 1 1 d . . . 
H65A H 0.3617 0.3641 0.5821 0.131 Uiso 1 1 calc R . . 
C66 C 0.4822(3) 0.3385(3) 0.5161(2) 0.0741(10) Uani 1 1 d . . . 
H66A H 0.4945 0.3994 0.5032 0.089 Uiso 1 1 calc R . . 
C71 C 0.7259(2) 0.19765(17) 0.42004(15) 0.0382(5) Uani 1 1 d . . . 
C72 C 0.6856(3) 0.1211(2) 0.35694(17) 0.0537(7) Uani 1 1 d . . . 
H72A H 0.6174 0.1222 0.3146 0.064 Uiso 1 1 calc R . . 
C73 C 0.7455(3) 0.0430(2) 0.3559(2) 0.0645(8) Uani 1 1 d . . . 
H73A H 0.7181 -0.0084 0.3131 0.077 Uiso 1 1 calc R . . 
C74 C 0.8446(3) 0.0413(2) 0.4178(2) 0.0683(9) Uani 1 1 d . . . 
H74A H 0.8845 -0.0118 0.4175 0.082 Uiso 1 1 calc R . . 
C75 C 0.8864(3) 0.1167(2) 0.4805(2) 0.0726(10) Uani 1 1 d . . . 
H75A H 0.9548 0.1148 0.5225 0.087 Uiso 1 1 calc R . . 
C76 C 0.8280(3) 0.1956(2) 0.48207(18) 0.0553(7) Uani 1 1 d . . . 
H76A H 0.8572 0.2472 0.5246 0.066 Uiso 1 1 calc R . . 
C81 C 0.7436(2) 0.40566(18) 0.46824(14) 0.0391(5) Uani 1 1 d . . . 
C82 C 0.7875(3) 0.4353(2) 0.55033(16) 0.0493(6) Uani 1 1 d . . . 
H82A H 0.7618 0.3964 0.5834 0.059 Uiso 1 1 calc R . . 
C83 C 0.8696(3) 0.5227(2) 0.58243(18) 0.0567(7) Uani 1 1 d . . . 
H83A H 0.8995 0.5421 0.6371 0.068 Uiso 1 1 calc R . . 
C84 C 0.9072(3) 0.5812(2) 0.53360(19) 0.0558(7) Uani 1 1 d . . . 
H84A H 0.9616 0.6401 0.5555 0.067 Uiso 1 1 calc R . . 
C85 C 0.8645(3) 0.5525(2) 0.45285(19) 0.0541(7) Uani 1 1 d . . . 
H85A H 0.8903 0.5919 0.4202 0.065 Uiso 1 1 calc R . . 
C86 C 0.7832(2) 0.46509(19) 0.41976(16) 0.0453(6) Uani 1 1 d . . . 
H86A H 0.7548 0.4459 0.3650 0.054 Uiso 1 1 calc R . . 
C1 C 1.1624(3) 0.3219(2) 0.88419(17) 0.0500(7) Uani 1 1 d . . . 
C11 C 1.1830(4) 0.3511(3) 0.97379(19) 0.0731(10) Uani 1 1 d . . . 
H11A H 1.1106 0.3774 0.9823 0.088 Uiso 1 1 calc R . . 
H11B H 1.1840 0.2930 0.9963 0.088 Uiso 1 1 calc R . . 
C12 C 1.3017(4) 0.4239(3) 1.0200(2) 0.0851(12) Uani 1 1 d . . . 
H12A H 1.3181 0.4189 1.0754 0.102 Uiso 1 1 calc R . . 
H12B H 1.3721 0.4056 1.0021 0.102 Uiso 1 1 calc R . . 
C13 C 1.2997(4) 0.5292(3) 1.0142(2) 0.0875(12) Uani 1 1 d . . . 
H13A H 1.3718 0.5683 1.0548 0.105 Uiso 1 1 calc R . . 
H13B H 1.2245 0.5452 1.0273 0.105 Uiso 1 1 calc R . . 
C14 C 1.3018(3) 0.5606(3) 0.9354(2) 0.0712(9) Uani 1 1 d . . . 
H14A H 1.3153 0.6305 0.9436 0.085 Uiso 1 1 calc R . . 
H14B H 1.3728 0.5404 0.9193 0.085 Uiso 1 1 calc R . . 
C15 C 1.1811(3) 0.51950(19) 0.86826(16) 0.0492(6) Uani 1 1 d . . . 
H15A H 1.1096 0.5262 0.8903 0.059 Uiso 1 1 calc R . . 
C16 C 1.1252(3) 0.69588(19) 0.82323(17) 0.0507(7) Uani 1 1 d . . . 
C17 C 1.0979(3) 0.7200(2) 0.89501(19) 0.0604(8) Uani 1 1 d . . . 
H17A H 1.1042 0.6775 0.9302 0.072 Uiso 1 1 calc R . . 
C18 C 1.0617(3) 0.8067(2) 0.9143(2) 0.0634(8) Uani 1 1 d . . . 
H18A H 1.0440 0.8219 0.9626 0.076 Uiso 1 1 calc R . . 
C19 C 1.0510(3) 0.8716(2) 0.8636(2) 0.0617(8) Uani 1 1 d . . . 
C20 C 1.0785(3) 0.8474(2) 0.7925(2) 0.0663(9) Uani 1 1 d . . . 
H20A H 1.0726 0.8903 0.7575 0.080 Uiso 1 1 calc R . . 
C21 C 1.1144(3) 0.7616(2) 0.77250(19) 0.0591(8) Uani 1 1 d . . . 
H21A H 1.1319 0.7469 0.7240 0.071 Uiso 1 1 calc R . . 
C22 C 1.0112(4) 0.9665(2) 0.8847(3) 0.0872(12) Uani 1 1 d . . . 
H22A H 0.9958 0.9714 0.9359 0.131 Uiso 1 1 calc R . . 
H22B H 0.9353 0.9698 0.8459 0.131 Uiso 1 1 calc R . . 
H22C H 1.0770 1.0186 0.8858 0.131 Uiso 1 1 calc R . . 
B2 B 1.1617(3) 0.4085(2) 0.82678(18) 0.0423(6) Uani 1 1 d . . . 
B3 B 1.2840(3) 0.3405(3) 0.84201(18) 0.0502(8) Uani 1 1 d . . . 
H3 H 1.3815 0.3747 0.8751 0.060 Uiso 1 1 calc R . . 
B4 B 1.2176(4) 0.2232(3) 0.8499(2) 0.0605(9) Uani 1 1 d . . . 
H4 H 1.2715 0.1812 0.8887 0.073 Uiso 1 1 calc R . . 
B5 B 1.0549(4) 0.2171(3) 0.8379(3) 0.0652(10) Uani 1 1 d . . . 
H5 H 1.0025 0.1717 0.8686 0.078 Uiso 1 1 calc R . . 
B6 B 1.0207(3) 0.3303(2) 0.8229(2) 0.0528(8) Uani 1 1 d . . . 
H6 H 0.9454 0.3585 0.8440 0.063 Uiso 1 1 calc R . . 
B7 B 1.2156(3) 0.3597(2) 0.74643(18) 0.0475(7) Uani 1 1 d . . . 
H7 H 1.2678 0.4066 0.7166 0.057 Uiso 1 1 calc R . . 
B8 B 1.2505(3) 0.2449(3) 0.7612(2) 0.0569(9) Uani 1 1 d . . . 
H8 H 1.3263 0.2165 0.7409 0.068 Uiso 1 1 calc R . . 
B9 B 1.1095(4) 0.1674(3) 0.7582(2) 0.0659(10) Uani 1 1 d . . . 
H9 H 1.0930 0.0891 0.7361 0.079 Uiso 1 1 calc R . . 
B10 B 0.9862(4) 0.2344(3) 0.7415(3) 0.0660(10) Uani 1 1 d . . . 
H10 H 0.8888 0.1996 0.7085 0.079 Uiso 1 1 calc R . . 
B11 B 1.0516(3) 0.3524(2) 0.7342(2) 0.0499(7) Uani 1 1 d . . . 
H11 H 0.9964 0.3944 0.6961 0.060 Uiso 1 1 calc R . . 
B12 B 1.1079(4) 0.2524(3) 0.6943(2) 0.0587(9) Uani 1 1 d . . . 
H12 H 1.0902 0.2293 0.6300 0.070 Uiso 1 1 calc R . . 
C91 C 0.6303(8) 0.1787(6) 0.7775(5) 0.193(4) Uani 1 1 d D . . 
H91A H 0.5807 0.2233 0.7544 0.232 Uiso 1 1 calc R . . 
H91B H 0.6963 0.1721 0.7513 0.232 Uiso 1 1 calc R . . 
C92 C 0.6866(10) 0.2149(5) 0.8643(5) 0.214(5) Uani 1 1 d D . . 
H92A H 0.7781 0.2275 0.8775 0.257 Uiso 1 1 calc R . . 
H92B H 0.6585 0.2737 0.8815 0.257 Uiso 1 1 calc R . . 
C93 C 0.6426(11) 0.1397(8) 0.8996(4) 0.331(10) Uani 1 1 d D . . 
H93A H 0.6159 0.1654 0.9452 0.398 Uiso 1 1 calc R . . 
H93B H 0.7086 0.1034 0.9167 0.398 Uiso 1 1 calc R . . 
C94 C 0.5357(7) 0.0778(5) 0.8389(3) 0.169(3) Uani 1 1 d D . . 
H94A H 0.5321 0.0110 0.8450 0.203 Uiso 1 1 calc R . . 
H94B H 0.4572 0.0969 0.8436 0.203 Uiso 1 1 calc R . . 
 
loop_ 
 _atom_site_aniso_label 
 _atom_site_aniso_U_11 
 _atom_site_aniso_U_22 
 _atom_site_aniso_U_33 
 _atom_site_aniso_U_23 
 _atom_site_aniso_U_13 
 _atom_site_aniso_U_12 
S1 0.0800(5) 0.0453(4) 0.0561(5) 0.0155(3) 0.0269(4) 0.0095(4) 
O1 0.162(4) 0.148(4) 0.155(4) -0.023(3) 0.056(3) -0.014(3) 
N1 0.0372(11) 0.0461(12) 0.0370(11) 0.0103(9) 0.0045(9) 0.0075(9) 
P1 0.0342(3) 0.0368(3) 0.0373(3) 0.0083(3) 0.0053(3) 0.0070(2) 
P2 0.0349(3) 0.0397(3) 0.0328(3) 0.0079(3) 0.0084(2) 0.0113(3) 
C31 0.0475(14) 0.0402(14) 0.0367(13) 0.0095(11) 0.0070(11) 0.0083(11) 
C32 0.0524(16) 0.0648(19) 0.0437(15) 0.0051(13) 0.0137(13) 0.0035(14) 
C33 0.076(2) 0.090(3) 0.0534(19) 0.0058(17) 0.0305(17) 0.0111(19) 
C34 0.102(3) 0.077(2) 0.0414(17) 0.0021(16) 0.0225(18) 0.012(2) 
C35 0.080(2) 0.092(3) 0.0431(18) -0.0023(17) -0.0057(16) 0.003(2) 
C36 0.0540(17) 0.078(2) 0.0473(17) 0.0020(15) 0.0020(13) 0.0081(15) 
C41 0.0412(13) 0.0444(15) 0.0433(14) 0.0108(11) 0.0061(11) 0.0026(11) 
C42 0.073(2) 0.0444(17) 0.073(2) 0.0091(15) 0.0253(17) 0.0019(14) 
C43 0.106(3) 0.0477(19) 0.099(3) 0.0181(19) 0.030(2) -0.0091(19) 
C44 0.082(3) 0.087(3) 0.089(3) 0.035(2) 0.035(2) -0.010(2) 
C45 0.065(2) 0.084(3) 0.080(2) 0.029(2) 0.0327(18) 0.0102(18) 
C46 0.0497(16) 0.0588(18) 0.0606(18) 0.0181(14) 0.0185(14) 0.0091(13) 
C51 0.0410(13) 0.0390(13) 0.0394(13) 0.0082(11) 0.0055(10) 0.0097(10) 
C52 0.0376(14) 0.0552(17) 0.0690(19) 0.0231(14) 0.0120(13) 0.0108(12) 
C53 0.0479(16) 0.070(2) 0.076(2) 0.0303(17) 0.0156(15) 0.0273(15) 
C54 0.071(2) 0.0491(17) 0.070(2) 0.0180(15) 0.0052(16) 0.0249(15) 
C55 0.068(2) 0.0416(17) 0.102(3) 0.0200(17) -0.0131(19) 0.0028(15) 
C56 0.0429(15) 0.0478(17) 0.086(2) 0.0196(16) -0.0099(15) 0.0044(13) 
C61 0.0414(14) 0.0690(19) 0.0358(14) 0.0065(13) 0.0127(11) 0.0109(13) 
C62 0.082(2) 0.093(3) 0.078(2) 0.038(2) 0.045(2) 0.016(2) 
C63 0.111(4) 0.167(5) 0.109(4) 0.064(4) 0.066(3) 0.007(4) 
C64 0.082(3) 0.238(8) 0.066(3) 0.016(4) 0.045(2) 0.004(4) 
C65 0.060(2) 0.192(6) 0.067(3) -0.029(3) 0.024(2) 0.035(3) 
C66 0.0553(18) 0.099(3) 0.064(2) -0.0089(19) 0.0199(16) 0.0226(18) 
C71 0.0357(12) 0.0395(13) 0.0424(13) 0.0116(11) 0.0121(10) 0.0104(10) 
C72 0.0550(16) 0.0542(17) 0.0498(16) 0.0046(13) 0.0080(13) 0.0202(13) 
C73 0.068(2) 0.0531(18) 0.071(2) -0.0010(15) 0.0170(16) 0.0243(15) 
C74 0.0587(19) 0.0514(18) 0.099(3) 0.0160(18) 0.0186(18) 0.0263(15) 
C75 0.0561(18) 0.061(2) 0.091(3) 0.0154(18) -0.0077(17) 0.0249(15) 
C76 0.0484(15) 0.0471(16) 0.0606(18) 0.0055(13) -0.0029(13) 0.0135(12) 
C81 0.0376(12) 0.0417(13) 0.0372(13) 0.0065(10) 0.0057(10) 0.0142(10) 
C82 0.0546(16) 0.0515(16) 0.0404(14) 0.0073(12) 0.0103(12) 0.0116(13) 
C83 0.0551(17) 0.0590(18) 0.0449(16) -0.0062(14) 0.0024(13) 0.0112(14) 
C84 0.0488(16) 0.0414(15) 0.068(2) 0.0019(14) 0.0039(14) 0.0089(12) 
C85 0.0495(15) 0.0486(16) 0.0653(19) 0.0193(14) 0.0122(14) 0.0107(12) 
C86 0.0446(14) 0.0509(15) 0.0387(14) 0.0108(12) 0.0051(11) 0.0119(12) 
C1 0.0649(17) 0.0492(16) 0.0508(16) 0.0195(13) 0.0282(14) 0.0261(13) 
C11 0.113(3) 0.077(2) 0.0528(19) 0.0257(17) 0.043(2) 0.044(2) 
C12 0.118(3) 0.103(3) 0.0385(17) 0.0139(18) 0.0135(19) 0.047(3) 
C13 0.110(3) 0.086(3) 0.051(2) -0.0043(18) -0.0009(19) 0.026(2) 
C14 0.070(2) 0.065(2) 0.063(2) -0.0014(16) 0.0022(16) 0.0028(16) 
C15 0.0542(16) 0.0443(15) 0.0494(16) 0.0115(12) 0.0143(12) 0.0075(12) 
C16 0.0528(16) 0.0396(14) 0.0555(17) 0.0114(12) 0.0109(13) -0.0006(12) 
C17 0.079(2) 0.0460(17) 0.0565(18) 0.0167(14) 0.0173(16) 0.0087(15) 
C18 0.078(2) 0.0492(17) 0.0579(19) 0.0059(14) 0.0143(16) 0.0083(15) 
C19 0.0593(18) 0.0406(16) 0.075(2) 0.0099(15) 0.0047(15) 0.0023(13) 
C20 0.074(2) 0.0524(18) 0.071(2) 0.0266(16) 0.0114(17) 0.0087(15) 
C21 0.0638(18) 0.0555(18) 0.0581(18) 0.0204(14) 0.0147(14) 0.0056(14) 
C22 0.095(3) 0.0483(19) 0.108(3) 0.0083(19) 0.011(2) 0.0166(18) 
B2 0.0411(15) 0.0442(16) 0.0428(16) 0.0137(13) 0.0099(12) 0.0094(12) 
B3 0.0435(16) 0.069(2) 0.0421(17) 0.0126(15) 0.0119(13) 0.0223(15) 
B4 0.084(3) 0.059(2) 0.057(2) 0.0226(17) 0.0300(18) 0.0409(19) 
B5 0.084(3) 0.0419(18) 0.089(3) 0.0239(18) 0.048(2) 0.0204(17) 
B6 0.0452(17) 0.0415(17) 0.078(2) 0.0172(16) 0.0240(16) 0.0111(13) 
B7 0.0461(16) 0.0588(19) 0.0392(16) 0.0138(14) 0.0123(13) 0.0092(14) 
B8 0.064(2) 0.069(2) 0.0480(18) 0.0132(16) 0.0228(16) 0.0316(18) 
B9 0.088(3) 0.0463(19) 0.071(2) 0.0095(17) 0.030(2) 0.0241(18) 
B10 0.057(2) 0.0451(19) 0.090(3) 0.0076(18) 0.0147(19) 0.0028(15) 
B11 0.0415(16) 0.0462(17) 0.0566(19) 0.0121(15) 0.0031(14) 0.0067(13) 
B12 0.067(2) 0.056(2) 0.0478(19) 0.0057(16) 0.0083(16) 0.0116(17) 
C91 0.183(8) 0.176(8) 0.214(9) 0.063(7) 0.067(7) -0.037(6) 
C92 0.303(12) 0.107(5) 0.208(9) -0.034(5) 0.120(9) -0.067(6) 
C93 0.398(16) 0.364(15) 0.094(5) 0.017(7) 0.021(7) -0.265(14) 
C94 0.237(8) 0.132(5) 0.100(4) -0.004(4) 0.061(5) -0.088(5) 
 
_geom_special_details 
; 
 All esds (except the esd in the dihedral angle between two l.s. planes) 
 are estimated using the full covariance matrix.  The cell esds are taken 
 into account individually in the estimation of esds in distances, angles 
 and torsion angles; correlations between esds in cell parameters are only 
 used when they are defined by crystal symmetry.  An approximate (isotropic) 
 treatment of cell esds is used for estimating esds involving l.s. planes. 
; 
 
loop_ 
 _geom_bond_atom_site_label_1 
 _geom_bond_atom_site_label_2 
 _geom_bond_distance 
 _geom_bond_site_symmetry_2 
 _geom_bond_publ_flag 
S1 C16 1.747(3) . ? 
S1 C15 1.823(3) . ? 
O1 C94 1.331(6) . ? 
O1 C91 1.415(6) . ? 
N1 P2 1.574(2) . ? 
N1 P1 1.577(2) . ? 
P1 C51 1.790(3) . ? 
P1 C31 1.794(3) . ? 
P1 C41 1.800(3) . ? 
P2 C71 1.791(3) . ? 
P2 C61 1.797(3) . ? 
P2 C81 1.799(3) . ? 
C31 C32 1.365(4) . ? 
C31 C36 1.381(4) . ? 
C32 C33 1.387(4) . ? 
C33 C34 1.359(5) . ? 
C34 C35 1.358(5) . ? 
C35 C36 1.371(5) . ? 
C41 C46 1.376(4) . ? 
C41 C42 1.385(4) . ? 
C42 C43 1.390(5) . ? 
C43 C44 1.368(6) . ? 
C44 C45 1.354(6) . ? 
C45 C46 1.383(4) . ? 
C51 C56 1.380(4) . ? 
C51 C52 1.383(4) . ? 
C52 C53 1.373(4) . ? 
C53 C54 1.366(5) . ? 
C54 C55 1.367(5) . ? 
C55 C56 1.376(4) . ? 
C61 C66 1.369(4) . ? 
C61 C62 1.381(5) . ? 
C62 C63 1.384(5) . ? 
C63 C64 1.328(8) . ? 
C64 C65 1.352(8) . ? 
C65 C66 1.399(6) . ? 
C71 C72 1.378(4) . ? 
C71 C76 1.379(4) . ? 
C72 C73 1.376(4) . ? 
C73 C74 1.356(5) . ? 
C74 C75 1.364(5) . ? 
C75 C76 1.377(4) . ? 
C81 C86 1.395(4) . ? 
C81 C82 1.396(4) . ? 
C82 C83 1.386(4) . ? 
C83 C84 1.383(4) . ? 
C84 C85 1.372(4) . ? 
C85 C86 1.384(4) . ? 
C1 C11 1.534(4) . ? 
C1 B4 1.703(4) . ? 
C1 B3 1.708(4) . ? 
C1 B6 1.710(5) . ? 
C1 B2 1.712(4) . ? 
C1 B5 1.726(5) . ? 
C11 C12 1.522(6) . ? 
C12 C13 1.522(6) . ? 
C13 C14 1.533(5) . ? 
C14 C15 1.531(4) . ? 
C15 B2 1.604(4) . ? 
C16 C17 1.388(4) . ? 
C16 C21 1.388(4) . ? 
C17 C18 1.375(4) . ? 
C18 C19 1.378(5) . ? 
C19 C20 1.379(5) . ? 
C19 C22 1.506(5) . ? 
C20 C21 1.364(5) . ? 
B2 B6 1.770(4) . ? 
B2 B7 1.770(4) . ? 
B2 B3 1.770(4) . ? 
B2 B11 1.783(4) . ? 
B3 B8 1.752(5) . ? 
B3 B7 1.757(4) . ? 
B3 B4 1.768(5) . ? 
B4 B5 1.757(6) . ? 
B4 B8 1.762(5) . ? 
B4 B9 1.763(6) . ? 
B5 B6 1.750(5) . ? 
B5 B10 1.760(6) . ? 
B5 B9 1.769(5) . ? 
B6 B11 1.756(5) . ? 
B6 B10 1.761(5) . ? 
B7 B11 1.769(5) . ? 
B7 B12 1.773(5) . ? 
B7 B8 1.776(5) . ? 
B8 B12 1.759(5) . ? 
B8 B9 1.770(6) . ? 
B9 B10 1.770(5) . ? 
B9 B12 1.776(5) . ? 
B10 B12 1.770(6) . ? 
B10 B11 1.771(5) . ? 
B11 B12 1.761(5) . ? 
C91 C92 1.493(8) . ? 
C92 C93 1.408(7) . ? 
C93 C94 1.463(7) . ? 
 
loop_ 
 _geom_angle_atom_site_label_1 
 _geom_angle_atom_site_label_2 
 _geom_angle_atom_site_label_3 
 _geom_angle 
 _geom_angle_site_symmetry_1 
 _geom_angle_site_symmetry_3 
 _geom_angle_publ_flag 
C16 S1 C15 105.97(14) . . ? 
C94 O1 C91 108.3(5) . . ? 
P2 N1 P1 140.85(15) . . ? 
N1 P1 C51 110.22(12) . . ? 
N1 P1 C31 109.08(12) . . ? 
C51 P1 C31 105.73(12) . . ? 
N1 P1 C41 114.65(12) . . ? 
C51 P1 C41 109.60(13) . . ? 
C31 P1 C41 107.14(13) . . ? 
N1 P2 C71 110.46(12) . . ? 
N1 P2 C61 115.11(13) . . ? 
C71 P2 C61 105.76(13) . . ? 
N1 P2 C81 108.89(12) . . ? 
C71 P2 C81 109.21(13) . . ? 
C61 P2 C81 107.23(13) . . ? 
C32 C31 C36 119.5(3) . . ? 
C32 C31 P1 120.3(2) . . ? 
C36 C31 P1 120.2(2) . . ? 
C31 C32 C33 119.9(3) . . ? 
C34 C33 C32 120.1(3) . . ? 
C35 C34 C33 120.1(3) . . ? 
C34 C35 C36 120.4(3) . . ? 
C35 C36 C31 120.0(3) . . ? 
C46 C41 C42 118.9(3) . . ? 
C46 C41 P1 121.5(2) . . ? 
C42 C41 P1 119.2(2) . . ? 
C41 C42 C43 119.8(3) . . ? 
C44 C43 C42 120.2(4) . . ? 
C45 C44 C43 120.1(3) . . ? 
C44 C45 C46 120.5(4) . . ? 
C41 C46 C45 120.4(3) . . ? 
C56 C51 C52 119.2(2) . . ? 
C56 C51 P1 118.3(2) . . ? 
C52 C51 P1 122.3(2) . . ? 
C53 C52 C51 119.6(3) . . ? 
C54 C53 C52 120.8(3) . . ? 
C53 C54 C55 120.2(3) . . ? 
C54 C55 C56 119.6(3) . . ? 
C55 C56 C51 120.6(3) . . ? 
C66 C61 C62 119.0(3) . . ? 
C66 C61 P2 119.1(3) . . ? 
C62 C61 P2 121.8(2) . . ? 
C61 C62 C63 120.2(4) . . ? 
C64 C63 C62 120.9(5) . . ? 
C63 C64 C65 119.7(4) . . ? 
C64 C65 C66 121.5(5) . . ? 
C61 C66 C65 118.6(4) . . ? 
C72 C71 C76 119.2(2) . . ? 
C72 C71 P2 119.4(2) . . ? 
C76 C71 P2 121.3(2) . . ? 
C73 C72 C71 120.6(3) . . ? 
C74 C73 C72 119.6(3) . . ? 
C73 C74 C75 120.7(3) . . ? 
C74 C75 C76 120.4(3) . . ? 
C75 C76 C71 119.6(3) . . ? 
C86 C81 C82 119.2(2) . . ? 
C86 C81 P2 119.32(19) . . ? 
C82 C81 P2 121.5(2) . . ? 
C83 C82 C81 119.8(3) . . ? 
C84 C83 C82 120.4(3) . . ? 
C85 C84 C83 120.1(3) . . ? 
C84 C85 C86 120.3(3) . . ? 
C85 C86 C81 120.3(3) . . ? 
C11 C1 B4 118.5(2) . . ? 
C11 C1 B3 121.4(3) . . ? 
B4 C1 B3 62.4(2) . . ? 
C11 C1 B6 117.9(2) . . ? 
B4 C1 B6 111.9(2) . . ? 
B3 C1 B6 112.6(2) . . ? 
C11 C1 B2 120.0(2) . . ? 
B4 C1 B2 113.8(2) . . ? 
B3 C1 B2 62.33(17) . . ? 
B6 C1 B2 62.29(17) . . ? 
C11 C1 B5 116.1(3) . . ? 
B4 C1 B5 61.6(2) . . ? 
B3 C1 B5 112.9(2) . . ? 
B6 C1 B5 61.3(2) . . ? 
B2 C1 B5 113.2(2) . . ? 
C12 C11 C1 117.2(3) . . ? 
C13 C12 C11 116.6(3) . . ? 
C12 C13 C14 118.6(3) . . ? 
C15 C14 C13 114.2(3) . . ? 
C14 C15 B2 117.3(2) . . ? 
C14 C15 S1 111.8(2) . . ? 
B2 C15 S1 105.65(19) . . ? 
C17 C16 C21 117.9(3) . . ? 
C17 C16 S1 126.1(2) . . ? 
C21 C16 S1 115.9(2) . . ? 
C18 C17 C16 120.2(3) . . ? 
C17 C18 C19 121.6(3) . . ? 
C18 C19 C20 117.9(3) . . ? 
C18 C19 C22 121.5(3) . . ? 
C20 C19 C22 120.5(3) . . ? 
C21 C20 C19 121.1(3) . . ? 
C20 C21 C16 121.2(3) . . ? 
C15 B2 C1 118.8(2) . . ? 
C15 B2 B6 118.2(2) . . ? 
C1 B2 B6 58.79(18) . . ? 
C15 B2 B7 128.4(2) . . ? 
C1 B2 B7 105.0(2) . . ? 
B6 B2 B7 106.9(2) . . ? 
C15 B2 B3 122.8(2) . . ? 
C1 B2 B3 58.72(17) . . ? 
B6 B2 B3 106.9(2) . . ? 
B7 B2 B3 59.52(17) . . ? 
C15 B2 B11 125.6(2) . . ? 
C1 B2 B11 104.7(2) . . ? 
B6 B2 B11 59.23(19) . . ? 
B7 B2 B11 59.72(19) . . ? 
B3 B2 B11 106.8(2) . . ? 
C1 B3 B8 105.6(3) . . ? 
C1 B3 B7 105.8(2) . . ? 
B8 B3 B7 60.81(19) . . ? 
C1 B3 B4 58.65(18) . . ? 
B8 B3 B4 60.0(2) . . ? 
B7 B3 B4 108.6(2) . . ? 
C1 B3 B2 58.94(16) . . ? 
B8 B3 B2 108.8(2) . . ? 
B7 B3 B2 60.23(17) . . ? 
B4 B3 B2 107.9(2) . . ? 
C1 B4 B5 59.81(19) . . ? 
C1 B4 B8 105.4(2) . . ? 
B5 B4 B8 108.3(3) . . ? 
C1 B4 B9 106.7(2) . . ? 
B5 B4 B9 60.3(2) . . ? 
B8 B4 B9 60.3(2) . . ? 
C1 B4 B3 58.91(18) . . ? 
B5 B4 B3 108.5(2) . . ? 
B8 B4 B3 59.5(2) . . ? 
B9 B4 B3 108.4(2) . . ? 
C1 B5 B6 58.92(19) . . ? 
C1 B5 B4 58.5(2) . . ? 
B6 B5 B4 107.4(3) . . ? 
C1 B5 B10 105.8(2) . . ? 
B6 B5 B10 60.2(2) . . ? 
B4 B5 B10 108.0(3) . . ? 
C1 B5 B9 105.4(3) . . ? 
B6 B5 B9 108.1(3) . . ? 
B4 B5 B9 60.0(2) . . ? 
B10 B5 B9 60.2(2) . . ? 
C1 B6 B5 59.8(2) . . ? 
C1 B6 B11 106.0(2) . . ? 
B5 B6 B11 108.8(2) . . ? 
C1 B6 B10 106.4(2) . . ? 
B5 B6 B10 60.2(2) . . ? 
B11 B6 B10 60.5(2) . . ? 
C1 B6 B2 58.92(17) . . ? 
B5 B6 B2 109.3(2) . . ? 
B11 B6 B2 60.76(18) . . ? 
B10 B6 B2 109.5(2) . . ? 
B3 B7 B11 108.0(2) . . ? 
B3 B7 B2 60.25(17) . . ? 
B11 B7 B2 60.51(18) . . ? 
B3 B7 B12 107.2(2) . . ? 
B11 B7 B12 59.62(19) . . ? 
B2 B7 B12 108.1(2) . . ? 
B3 B7 B8 59.47(19) . . ? 
B11 B7 B8 107.1(2) . . ? 
B2 B7 B8 107.8(2) . . ? 
B12 B7 B8 59.4(2) . . ? 
B3 B8 B12 108.1(2) . . ? 
B3 B8 B4 60.4(2) . . ? 
B12 B8 B4 107.9(3) . . ? 
B3 B8 B9 108.7(2) . . ? 
B12 B8 B9 60.5(2) . . ? 
B4 B8 B9 59.9(2) . . ? 
B3 B8 B7 59.72(19) . . ? 
B12 B8 B7 60.22(19) . . ? 
B4 B8 B7 108.0(2) . . ? 
B9 B8 B7 108.9(2) . . ? 
B4 B9 B5 59.7(2) . . ? 
B4 B9 B8 59.8(2) . . ? 
B5 B9 B8 107.4(3) . . ? 
B4 B9 B10 107.3(3) . . ? 
B5 B9 B10 59.6(2) . . ? 
B8 B9 B10 107.4(3) . . ? 
B4 B9 B12 107.1(3) . . ? 
B5 B9 B12 107.2(3) . . ? 
B8 B9 B12 59.5(2) . . ? 
B10 B9 B12 59.9(2) . . ? 
B5 B10 B6 59.6(2) . . ? 
B5 B10 B12 107.8(3) . . ? 
B6 B10 B12 107.0(3) . . ? 
B5 B10 B9 60.1(2) . . ? 
B6 B10 B9 107.6(3) . . ? 
B12 B10 B9 60.2(2) . . ? 
B5 B10 B11 107.7(3) . . ? 
B6 B10 B11 59.6(2) . . ? 
B12 B10 B11 59.6(2) . . ? 
B9 B10 B11 108.1(3) . . ? 
B6 B11 B12 107.6(2) . . ? 
B6 B11 B7 107.6(2) . . ? 
B12 B11 B7 60.3(2) . . ? 
B6 B11 B10 59.9(2) . . ? 
B12 B11 B10 60.1(2) . . ? 
B7 B11 B10 108.6(2) . . ? 
B6 B11 B2 60.01(19) . . ? 
B12 B11 B2 108.1(2) . . ? 
B7 B11 B2 59.77(17) . . ? 
B10 B11 B2 108.5(2) . . ? 
B8 B12 B11 108.2(2) . . ? 
B8 B12 B10 108.0(3) . . ? 
B11 B12 B10 60.2(2) . . ? 
B8 B12 B7 60.4(2) . . ? 
B11 B12 B7 60.07(19) . . ? 
B10 B12 B7 108.4(3) . . ? 
B8 B12 B9 60.1(2) . . ? 
B11 B12 B9 108.3(3) . . ? 
B10 B12 B9 59.9(2) . . ? 
B7 B12 B9 108.7(3) . . ? 
O1 C91 C92 106.9(6) . . ? 
C93 C92 C91 104.5(6) . . ? 
C92 C93 C94 106.1(7) . . ? 
O1 C94 C93 107.6(5) . . ? 
 
_diffrn_measured_fraction_theta_max    0.997 
_diffrn_reflns_theta_full              25.25 
_diffrn_measured_fraction_theta_full   0.997 
_refine_diff_density_max    0.694 
_refine_diff_density_min   -0.404 
_refine_diff_density_rms    0.051 
#===END
